# Supplementary material for: Air pollution emission inventory using national high-resolution spatial parameters for the Nordic countries and analysis of PM 2.5 spatial distribution for road transport and machinery and off-road sectors
Source: Copernicus journal article supplement (doi:10.5194/essd-16-1453-2024), 2024-03-15
Supplement: Supplementary file 1 [file essd-16-1453-2024-supplement.zip]

Archive with 3 entries (3 files):
- essd-2023-366_Supplement_S1_Proxy_table_S2_Emission_maps.pdf
- essd-16-1453-2024-supplement-title-page.pdf
- essd-2023-366_Supplement_S3_Emission_tables.xlsx
