# Supplementary material for: Air pollution emission inventory using national high-resolution spatial parameters for the Nordic countries and analysis of PM 2.5 spatial distribution for road transport and machinery and off-road sectors
Source: Copernicus journal article supplement (doi:10.5194/essd-16-1453-2024), 2024-03-15
Supplement: Supplementary file 1 [file essd-16-1453-2024-supplement.zip › essd-16-1453-2024-supplement-title-page.pdf]

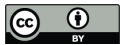

## *Supplement of*

# **Air pollution emission inventory using national high-resolution spatial parameters for the Nordic countries and analysis of PM<sub>2.5</sub> spatial distribution for road transport and machinery and off-road sectors**

**Ville-Veikko Paunu et al.**

*Correspondence to:* Ville-Veikko Paunu ([ville-veikko.paunu@syke.fi](mailto:ville-veikko.paunu@syke.fi))

- [essd-16-1453-2024-supplement-title-page.pdf](#)
- [essd-2023-366\\_Supplement\\_S1\\_Proxy\\_table\\_S2\\_Emission\\_maps.pdf](#)
- [essd-2023-366\\_Supplement\\_S3\\_Emission\\_tables.xlsx](#)

The copyright of individual parts of the supplement might differ from the article licence.
