# Supplementary material for: Air pollution emission inventory using national high-resolution spatial parameters for the Nordic countries and analysis of PM 2.5 spatial distribution for road transport and machinery and off-road sectors
Source: Copernicus journal article supplement (doi:10.5194/essd-16-1453-2024), 2024-03-15
Supplement: Supplementary file 1 [file essd-16-1453-2024-supplement.zip › essd-2023-366_Supplement_S1_Proxy_table_S2_Emission_maps.pdf]

## S1. Spatial proxies in the Nordic Countries

**Table S1 Main spatial proxies for all SNAP sectors used in the Nordic Countries.**

| SNAP sector                                   | Denmark                                                                                                                                                         | Finland                                                                          | Iceland              | Norway                                                                        | Sweden                                                                     |
|-----------------------------------------------|-----------------------------------------------------------------------------------------------------------------------------------------------------------------|----------------------------------------------------------------------------------|----------------------|-------------------------------------------------------------------------------|----------------------------------------------------------------------------|
| 01 Energy                                     | Point sources                                                                                                                                                   | Point sources<br>Municipal energy<br>production fuel use                         |                      | Point sources                                                                 | Point sources                                                              |
| 02 Non-ind.<br>combustion                     | Chimney sweeper<br>data<br>Building and<br>dwelling register                                                                                                    | Building data<br>Residential area type<br>Heating degree day<br>Average wood use |                      | Building number<br>and type<br>Wood<br>consumption                            | Building number and<br>type<br>Wood consumption                            |
| 03 Manufacturing<br>industry                  | Point sources<br>Land use                                                                                                                                       | Point sources<br>Municipal energy<br>production fuel use                         | Point sources        | Point sources                                                                 | Point sources                                                              |
| 04 Production<br>processes                    | Point sources<br>Land use<br>Employment<br>statistics<br>Building data                                                                                          | Point sources<br>Municipal energy<br>production fuel use                         |                      | Point sources                                                                 | Point sources                                                              |
| 05 Extraction and<br>distribution of<br>fuels | Point sources<br>Building data<br>Service stations<br>Gas network data                                                                                          | Land use<br>Population                                                           |                      |                                                                               |                                                                            |
| 06 Solvent and<br>product use                 | Population<br>Building data<br>Land use<br>Road network                                                                                                         | Land use<br>Population                                                           |                      | Population                                                                    | Population                                                                 |
| 07 Road transport                             | Road and traffic<br>data                                                                                                                                        | Road and traffic data<br>Municipal fuel use<br>and vehicle-<br>kilometres        | Traffic<br>modelling | Road and traffic<br>data<br>Share of HDV<br>CO2 emission at<br>regional level | Road and traffic data<br>Share of HDV<br>CO2 emission at<br>regional level |
| 08 Machinery<br>and off-road                  | Aviation data<br>Land use<br>Fishing areas and<br>catch statistics<br>Military training<br>areas<br>Construction<br>statistics<br>The Danish land<br>use matrix | Land use<br>Road and traffic data                                                |                      | Land use                                                                      | Land use                                                                   |
| 09 Waste                                      | Point sources<br>Building data<br>Population<br>Land use<br>Waste and<br>recycling data                                                                         | Population<br>Land use                                                           |                      |                                                                               |                                                                            |

|    |             |                                                                                                                                                                  |                                         |          |          |
|----|-------------|------------------------------------------------------------------------------------------------------------------------------------------------------------------|-----------------------------------------|----------|----------|
| 10 | Agriculture | General<br>Agricultural<br>Register<br>Central<br>Husbandry<br>Register<br>Fertilizer and<br>livestock<br>reporting<br>Land use<br>The Danish land<br>use matrix | Land use<br>Municipal animal<br>numbers | Land use | Land use |
|----|-------------|------------------------------------------------------------------------------------------------------------------------------------------------------------------|-----------------------------------------|----------|----------|

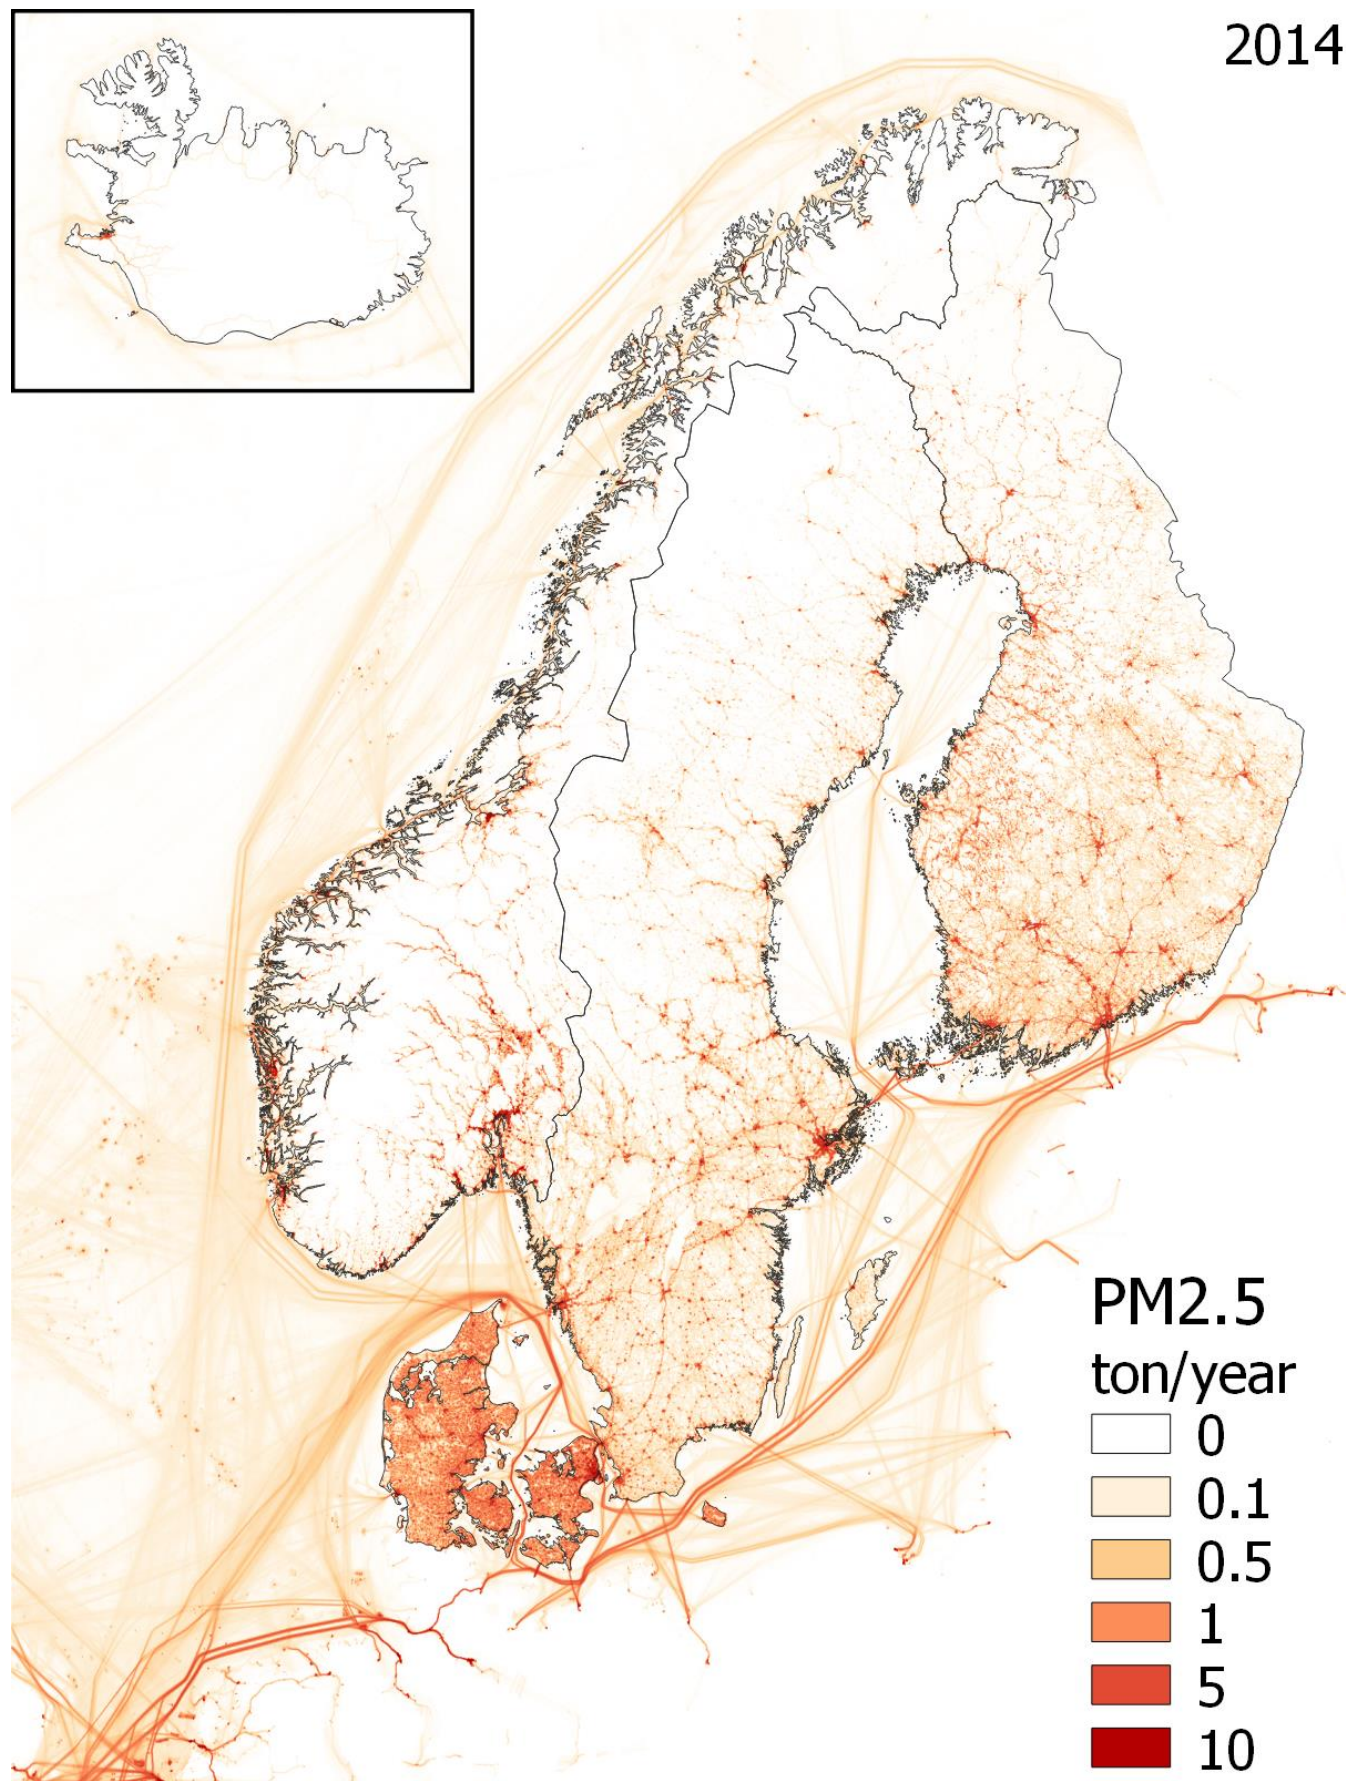

Figure S1 Total PM<sub>2.5</sub> emissions in the Nordic countries in 2014 (except shipping around Iceland in 2010) in 1 km x 1 km resolution. The map also shows the spatial extent of shipping emissions in the Nordic inventory. The legend shows the colours at the exact emissions values, and colours between these values are interpolated.

2014

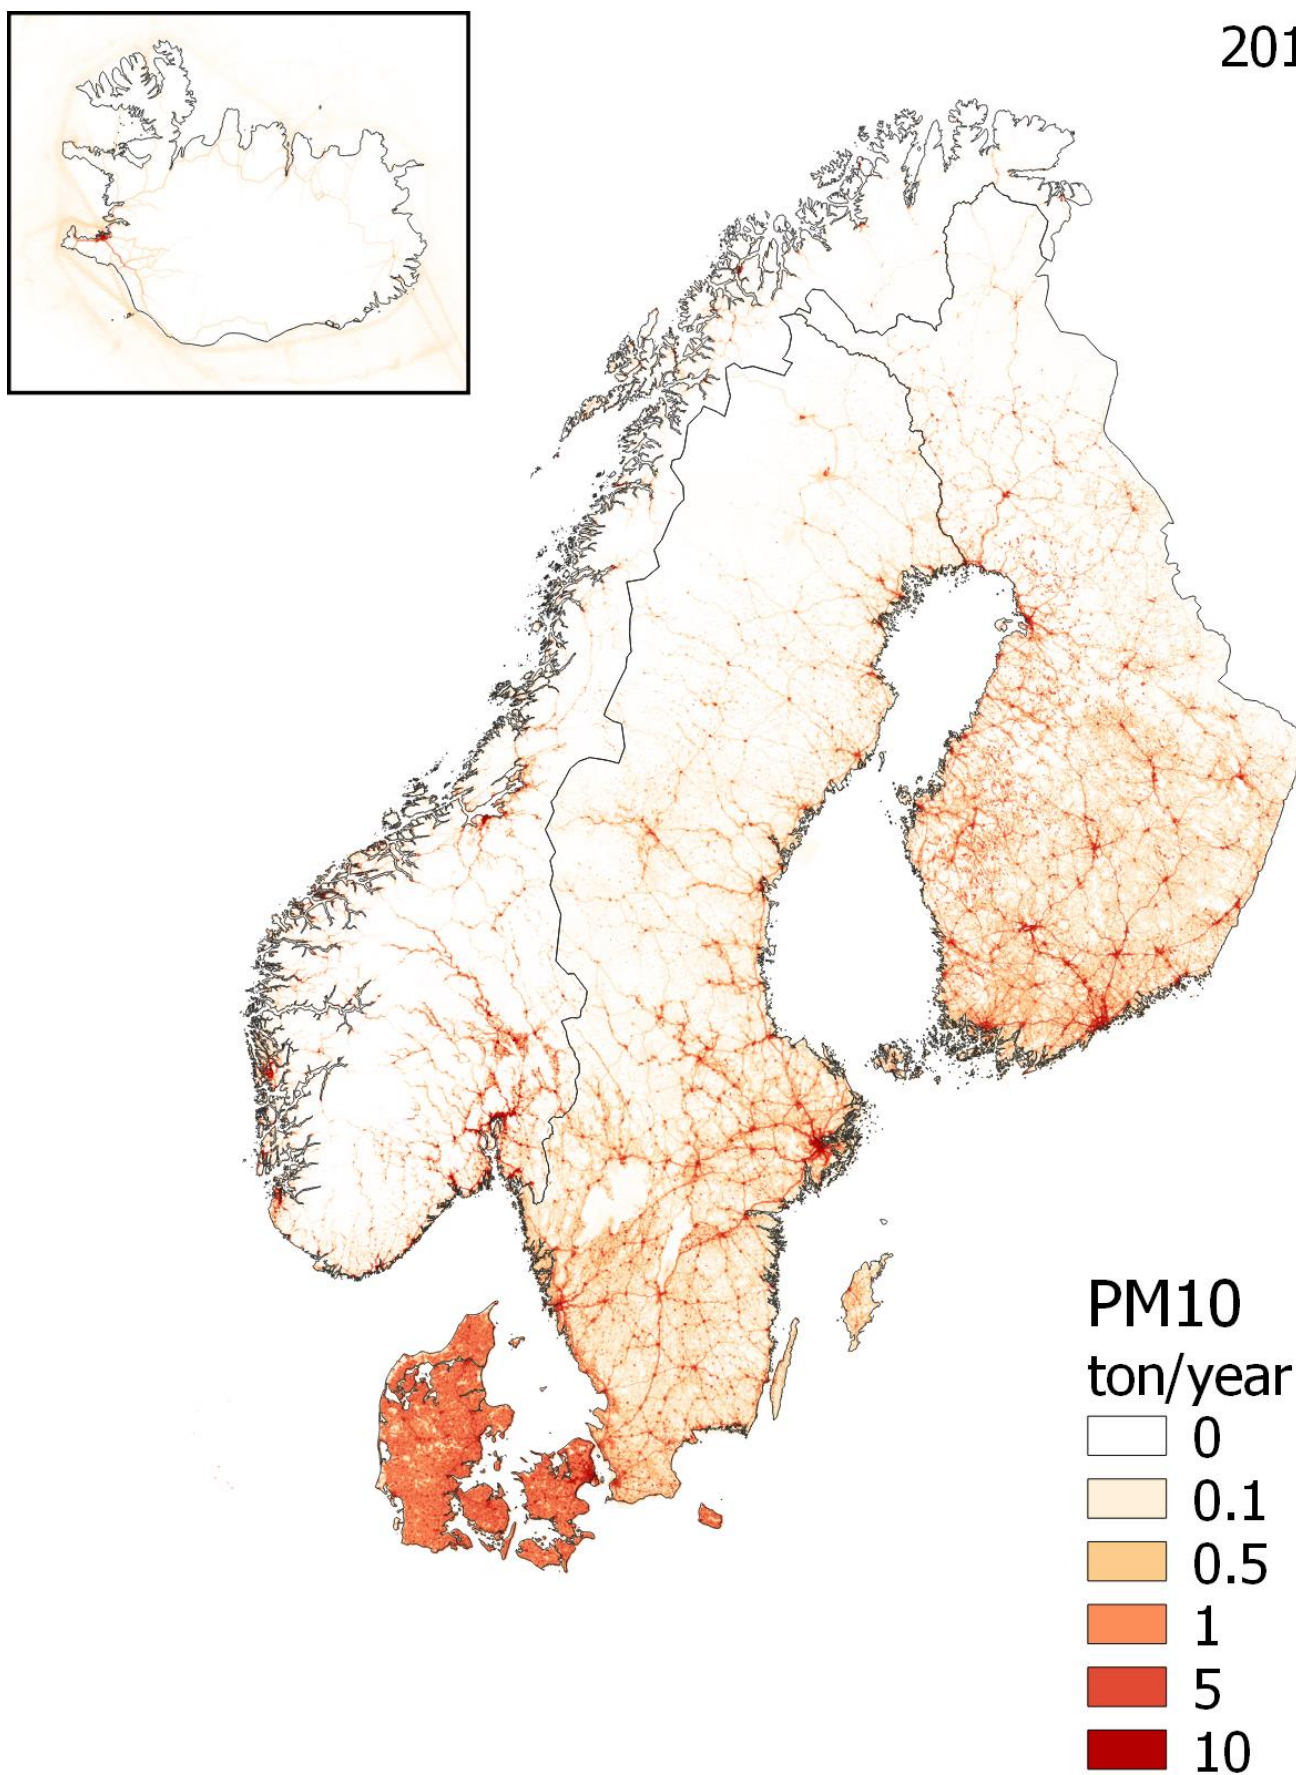

**Figure S2 Total PM<sub>10</sub> emissions in the Nordic countries in 2014 in 1 km x 1 km resolution. The map also shows the spatial extent of shipping emissions in the Nordic inventory. The legend shows the colours at the exact emissions values, and colours between these values are interpolated.**

2014

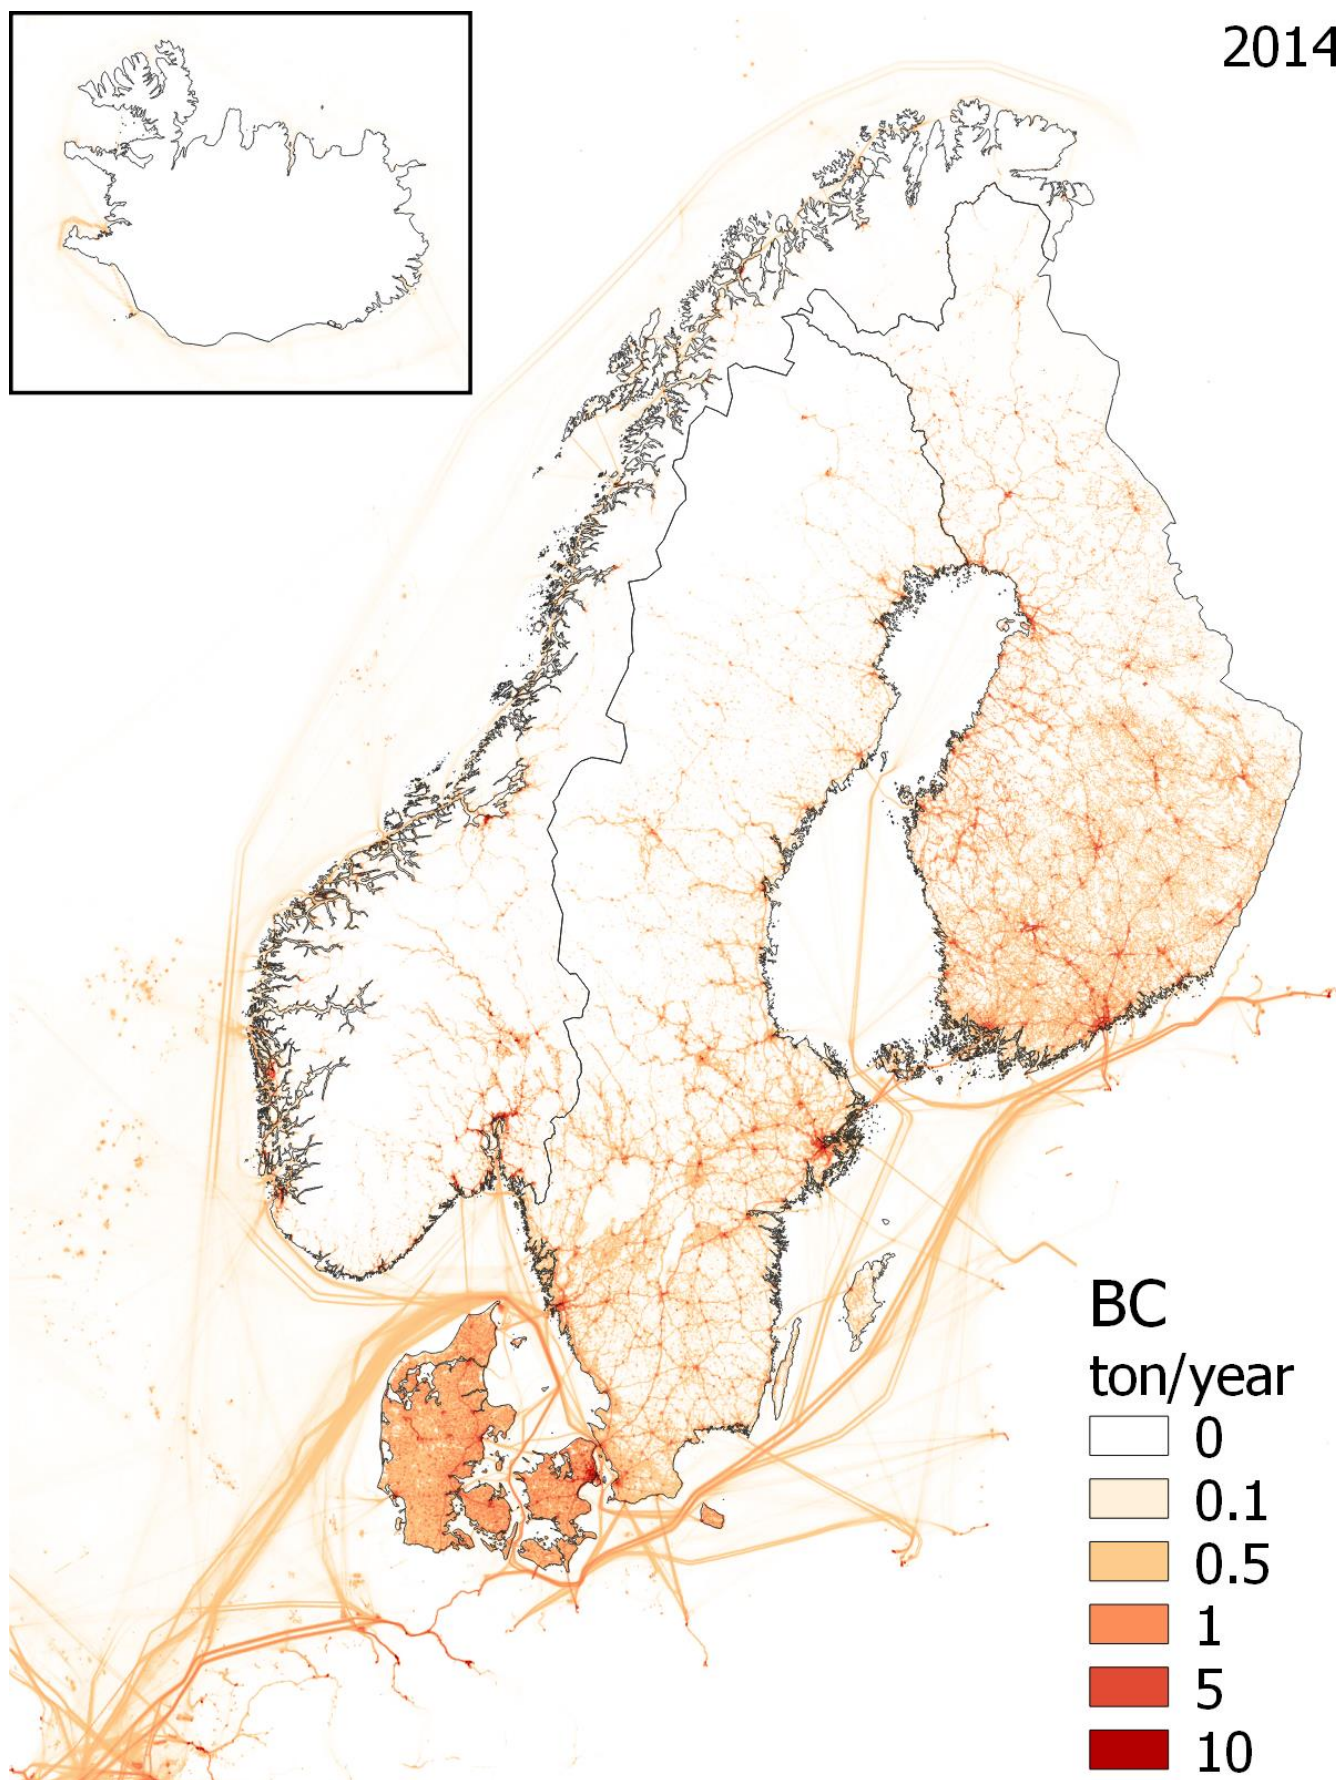

**Figure S3** Total black carbon emissions in the Nordic countries in 2014 (except shipping around Iceland in 2010) in 1 km x 1 km resolution. The map also shows the spatial extent of shipping emissions in the Nordic inventory. The legend shows the colours at the exact emissions values, and colours between these values are interpolated.

2014

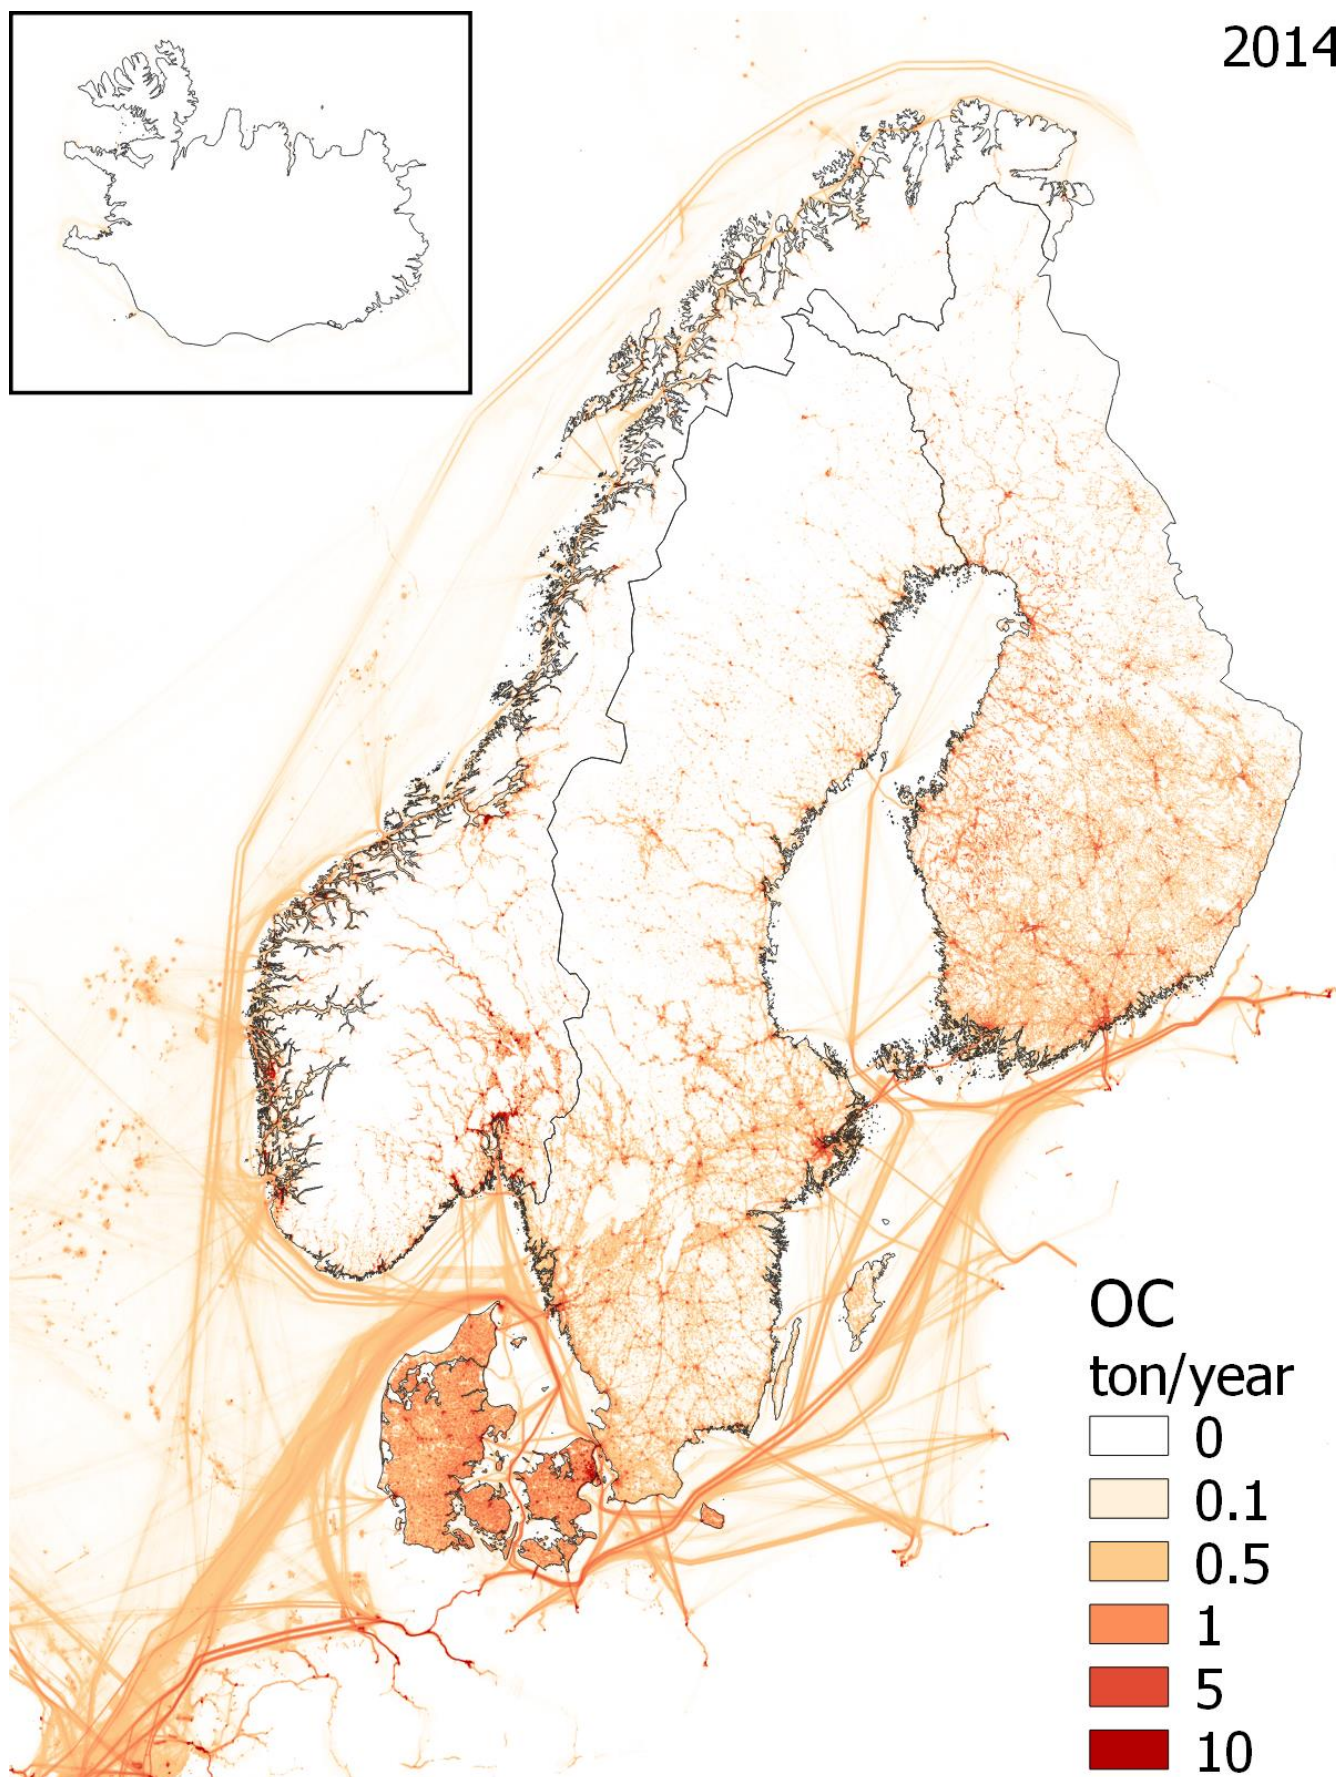

**Figure S4** Total organic carbon emissions in the Nordic countries in 2014 (except shipping around Iceland in 2010) in 1 km x 1 km resolution. The map also shows the spatial extent of shipping emissions in the Nordic inventory. The legend shows the colours at the exact emissions values, and colours between these values are interpolated.

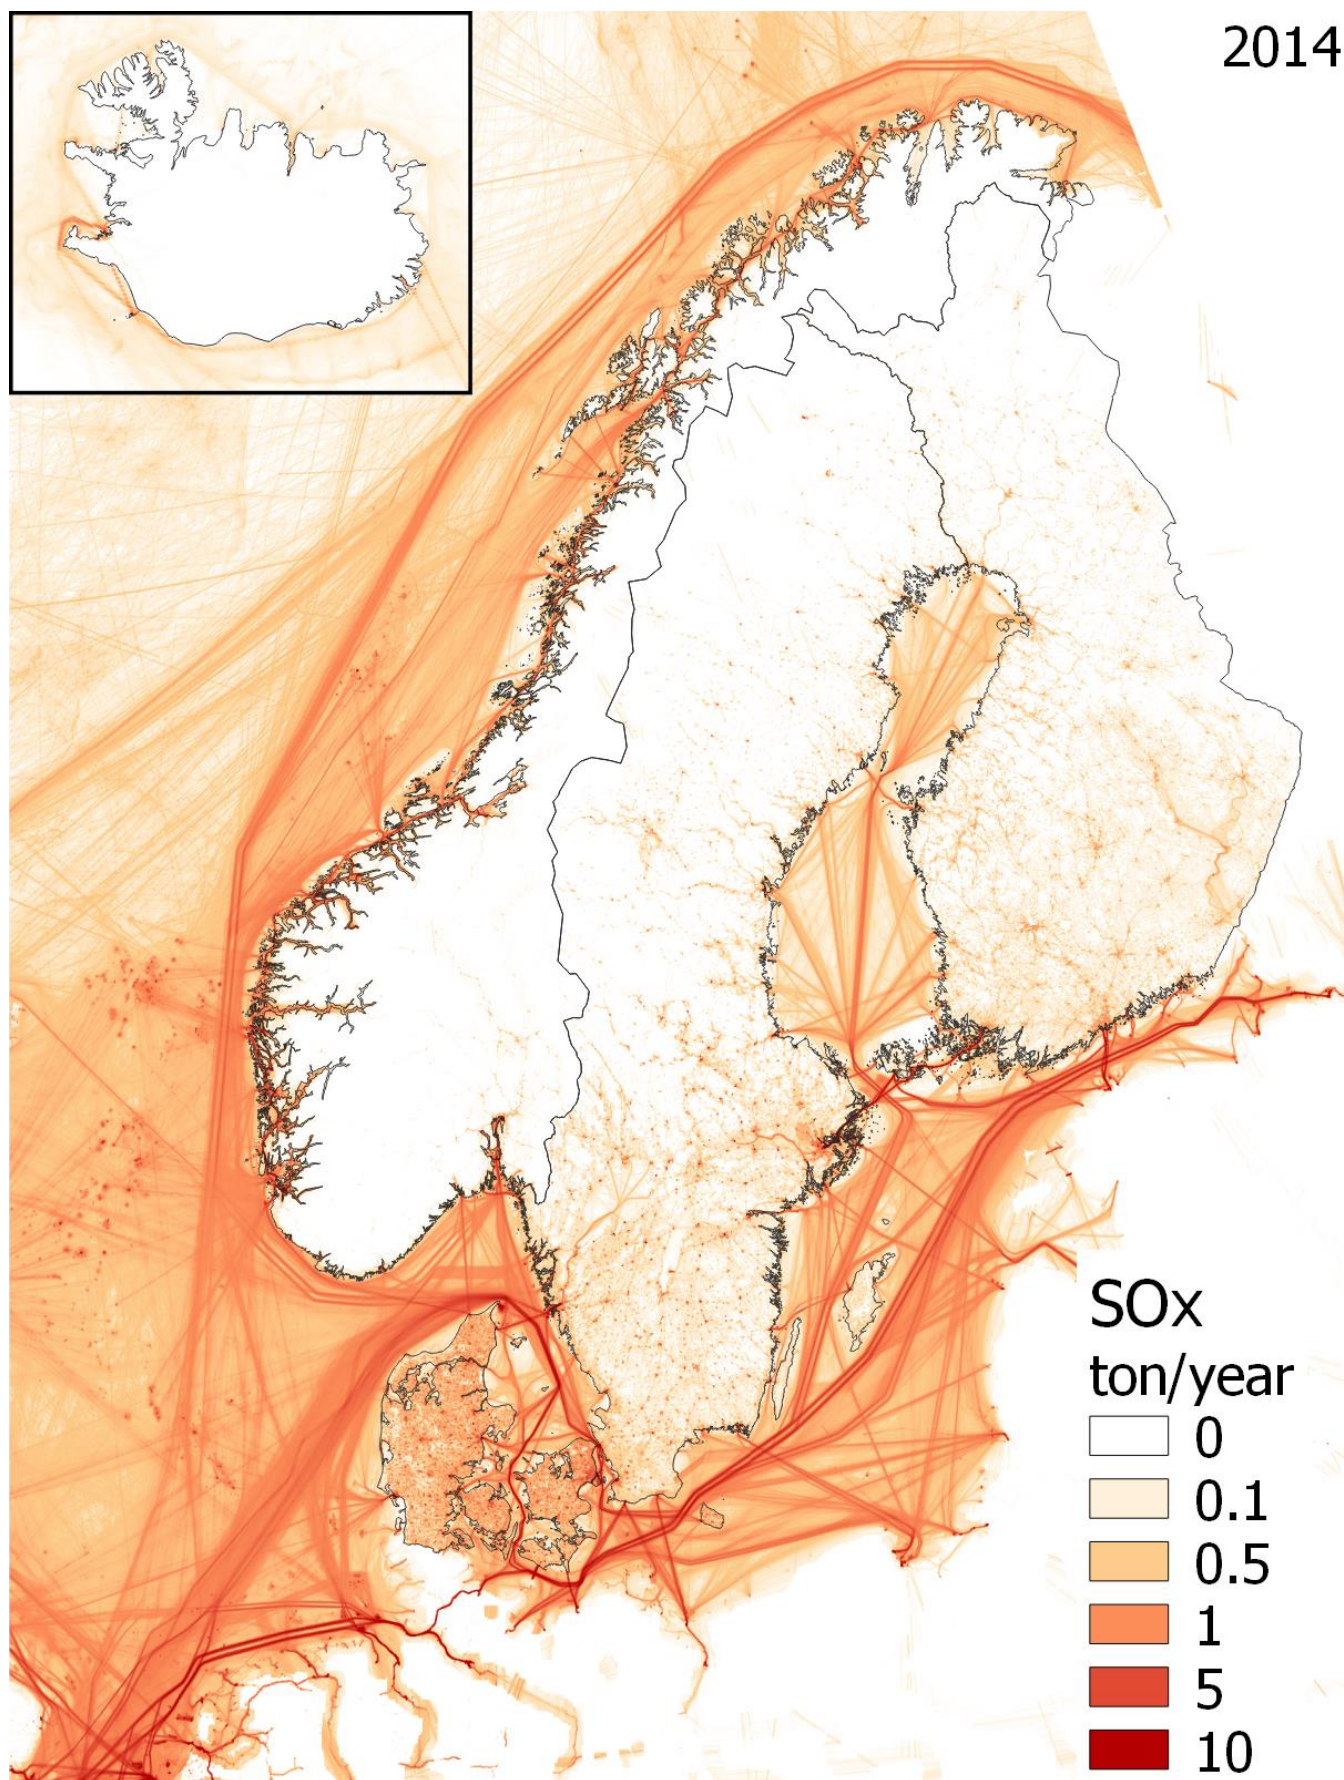

**Figure S5** Total sulphur oxides emissions in the Nordic countries in 2014 (except shipping around Iceland in 2010) in 1 km x 1 km resolution. The map also shows the spatial extent of shipping emissions in the Nordic inventory. The legend shows the colours at the exact emissions values, and colours between these values are interpolated.

2014

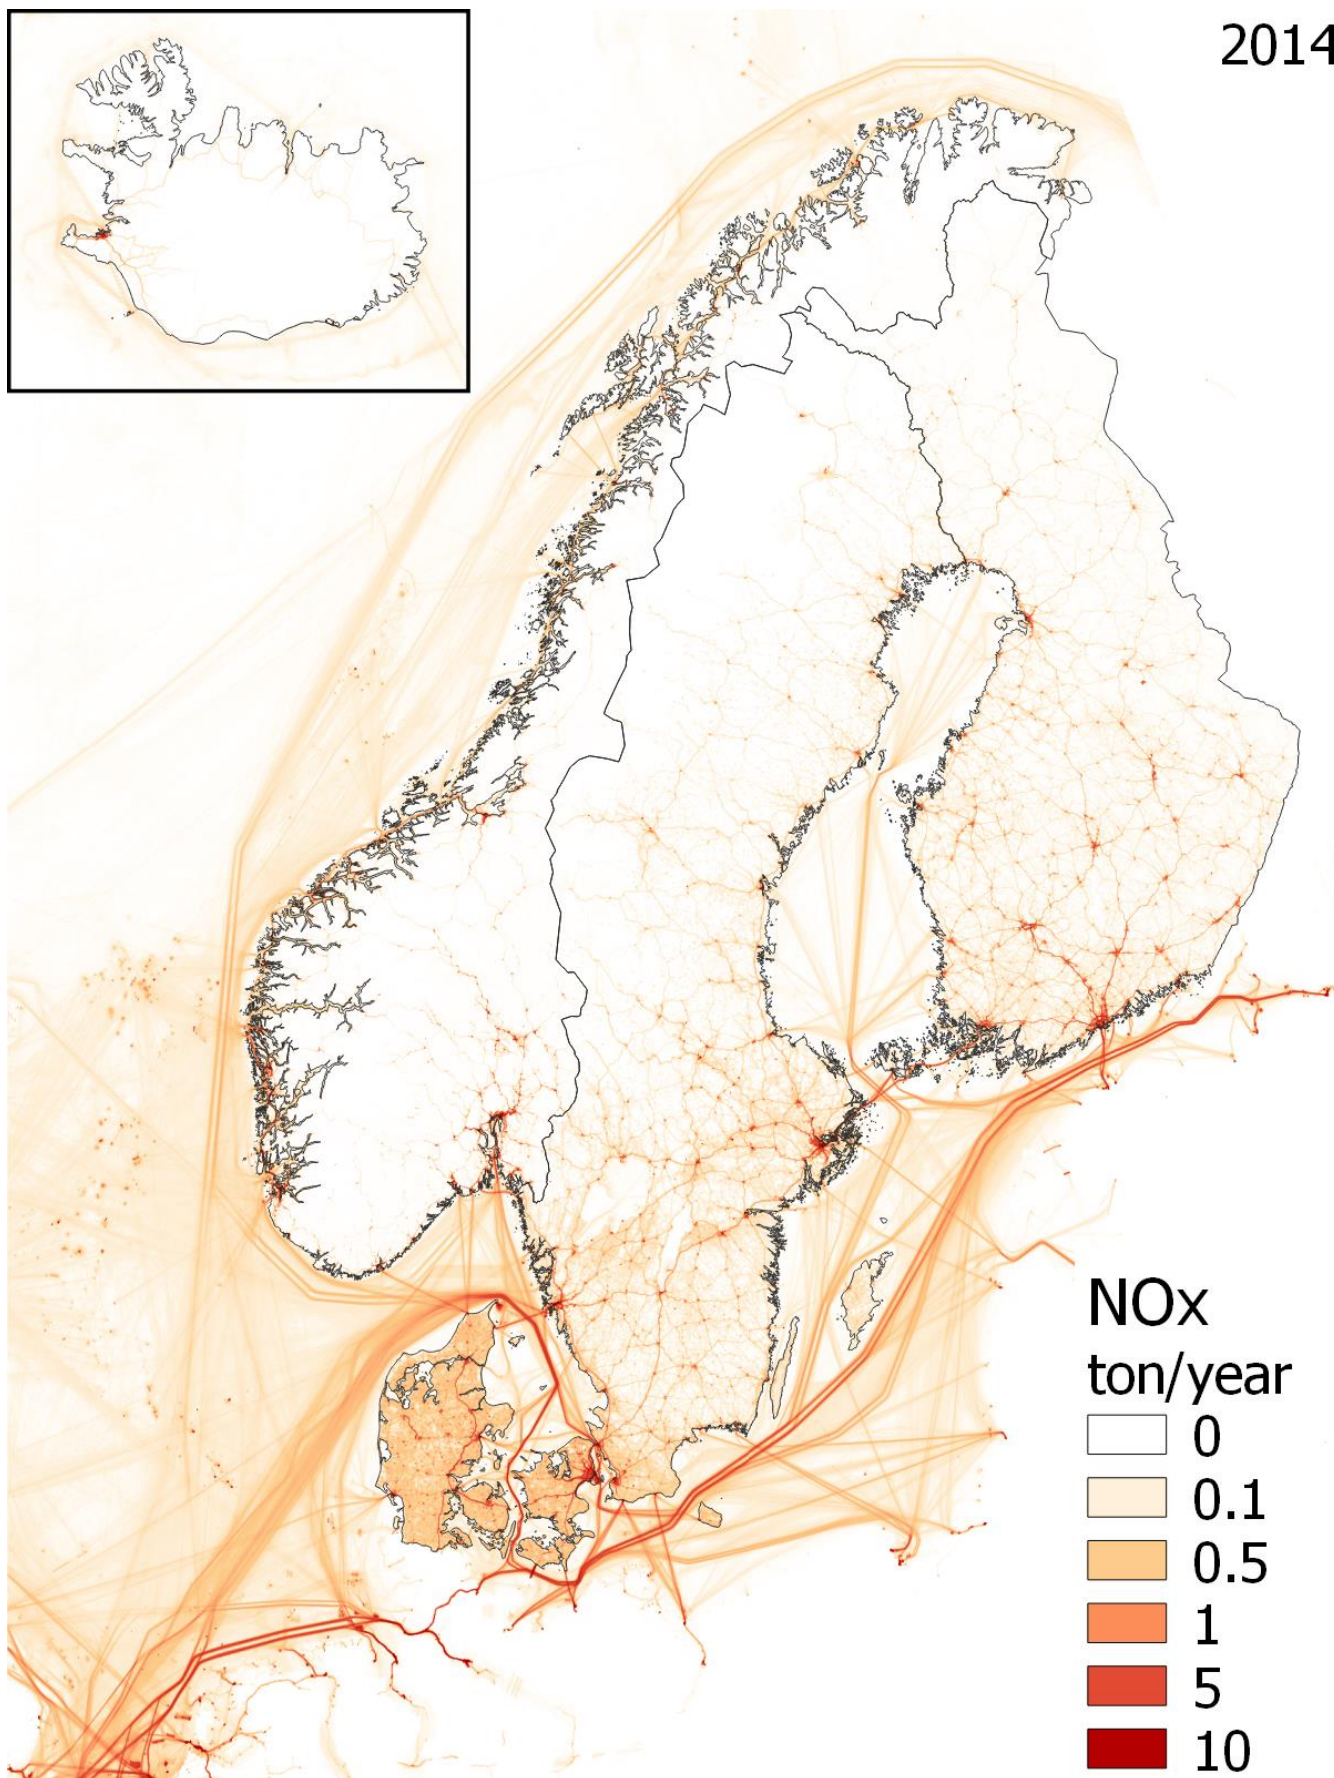

Figure S6 Total nitrogen oxides emissions in the Nordic countries in 2014 (except shipping around Iceland in 2010) in 1 km x 1 km resolution. The map also shows the spatial extent of shipping emissions in the Nordic inventory. The legend shows the colours at the exact emissions values, and colours between these values are interpolated.

2014

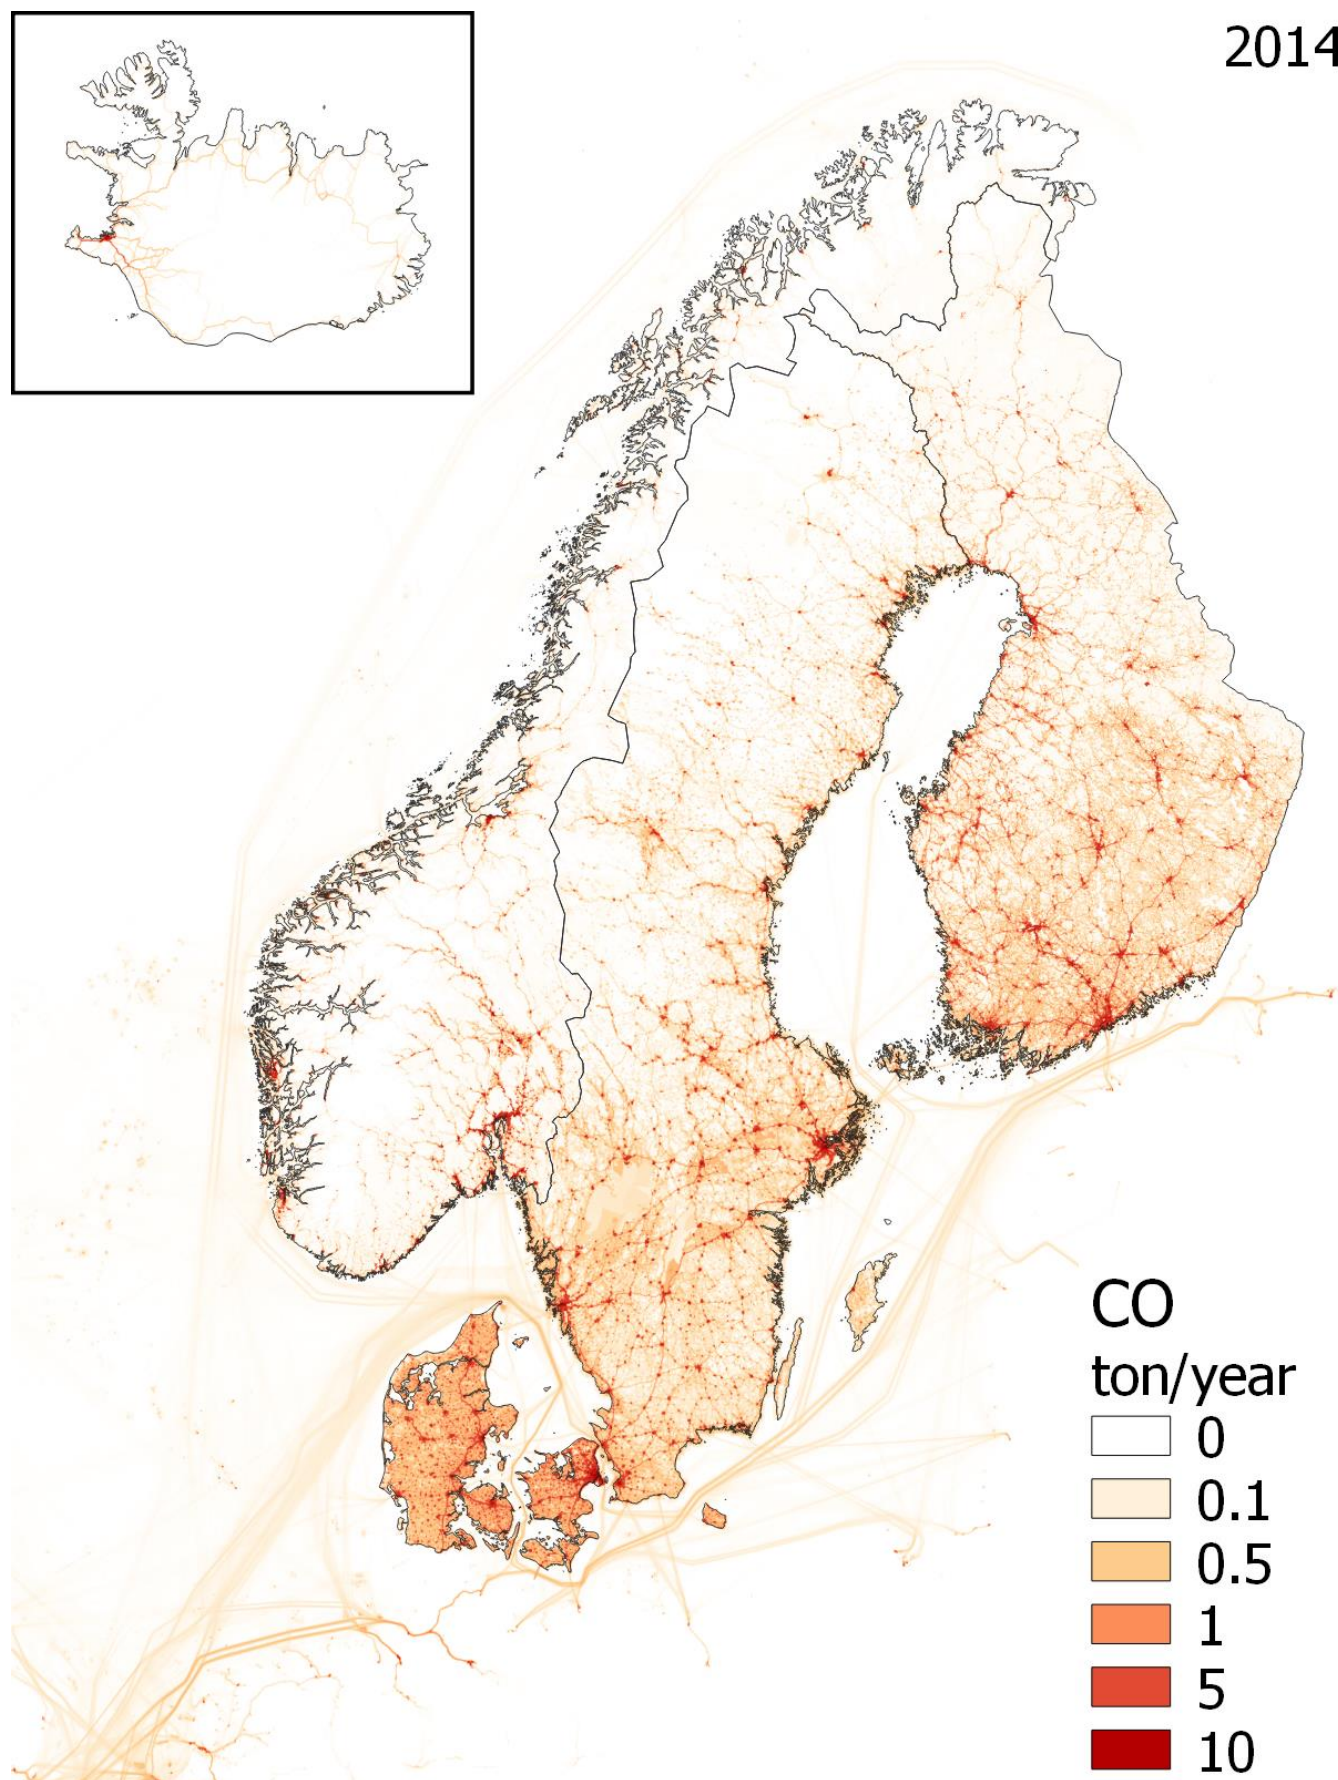

Figure S7 Total carbon monoxide emissions in the Nordic countries in 2014 (except shipping around Iceland in 2010) in 1 km x 1 km resolution. The map also shows the spatial extent of shipping emissions in the Nordic inventory. The legend shows the colours at the exact emissions values, and colours between these values are interpolated.

2014

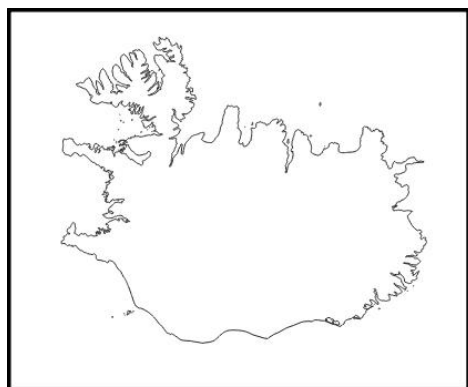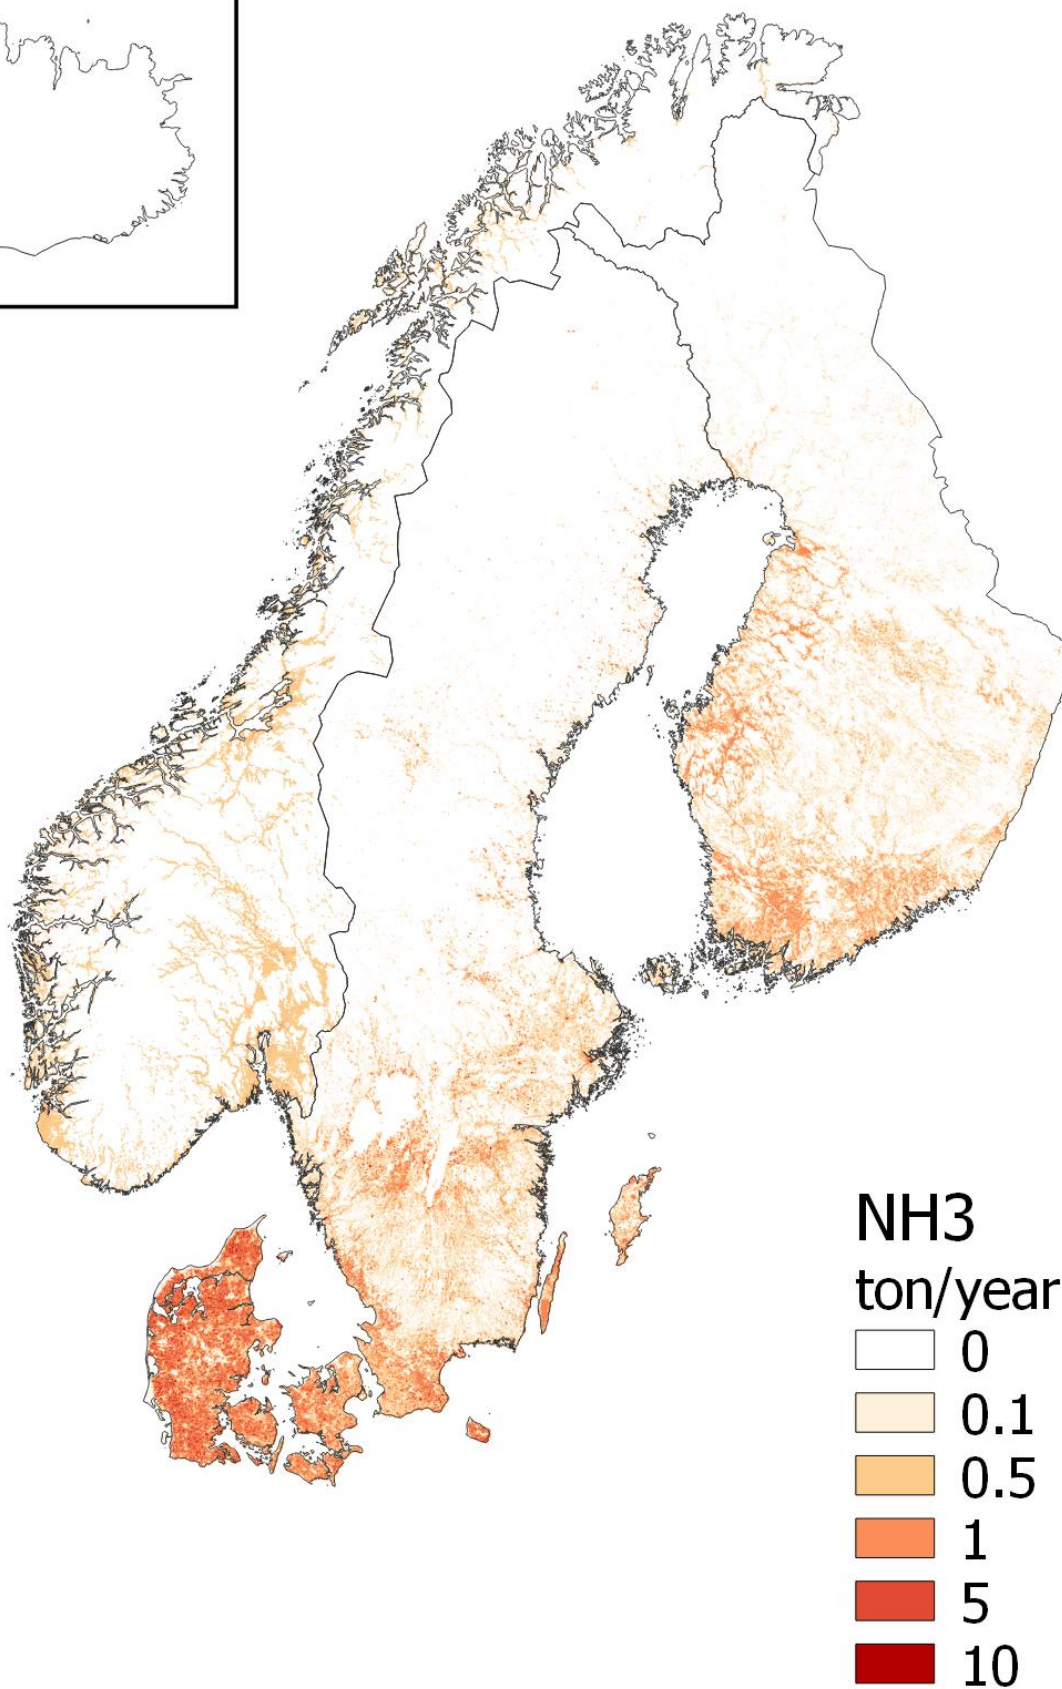

Figure S8 Total ammonia emissions in the Nordic countries in 2014 in 1 km x 1 km resolution. The map also shows the spatial extent of shipping emissions in the Nordic inventory. The legend shows the colours at the exact emissions values, and colours between these values are interpolated.

2014

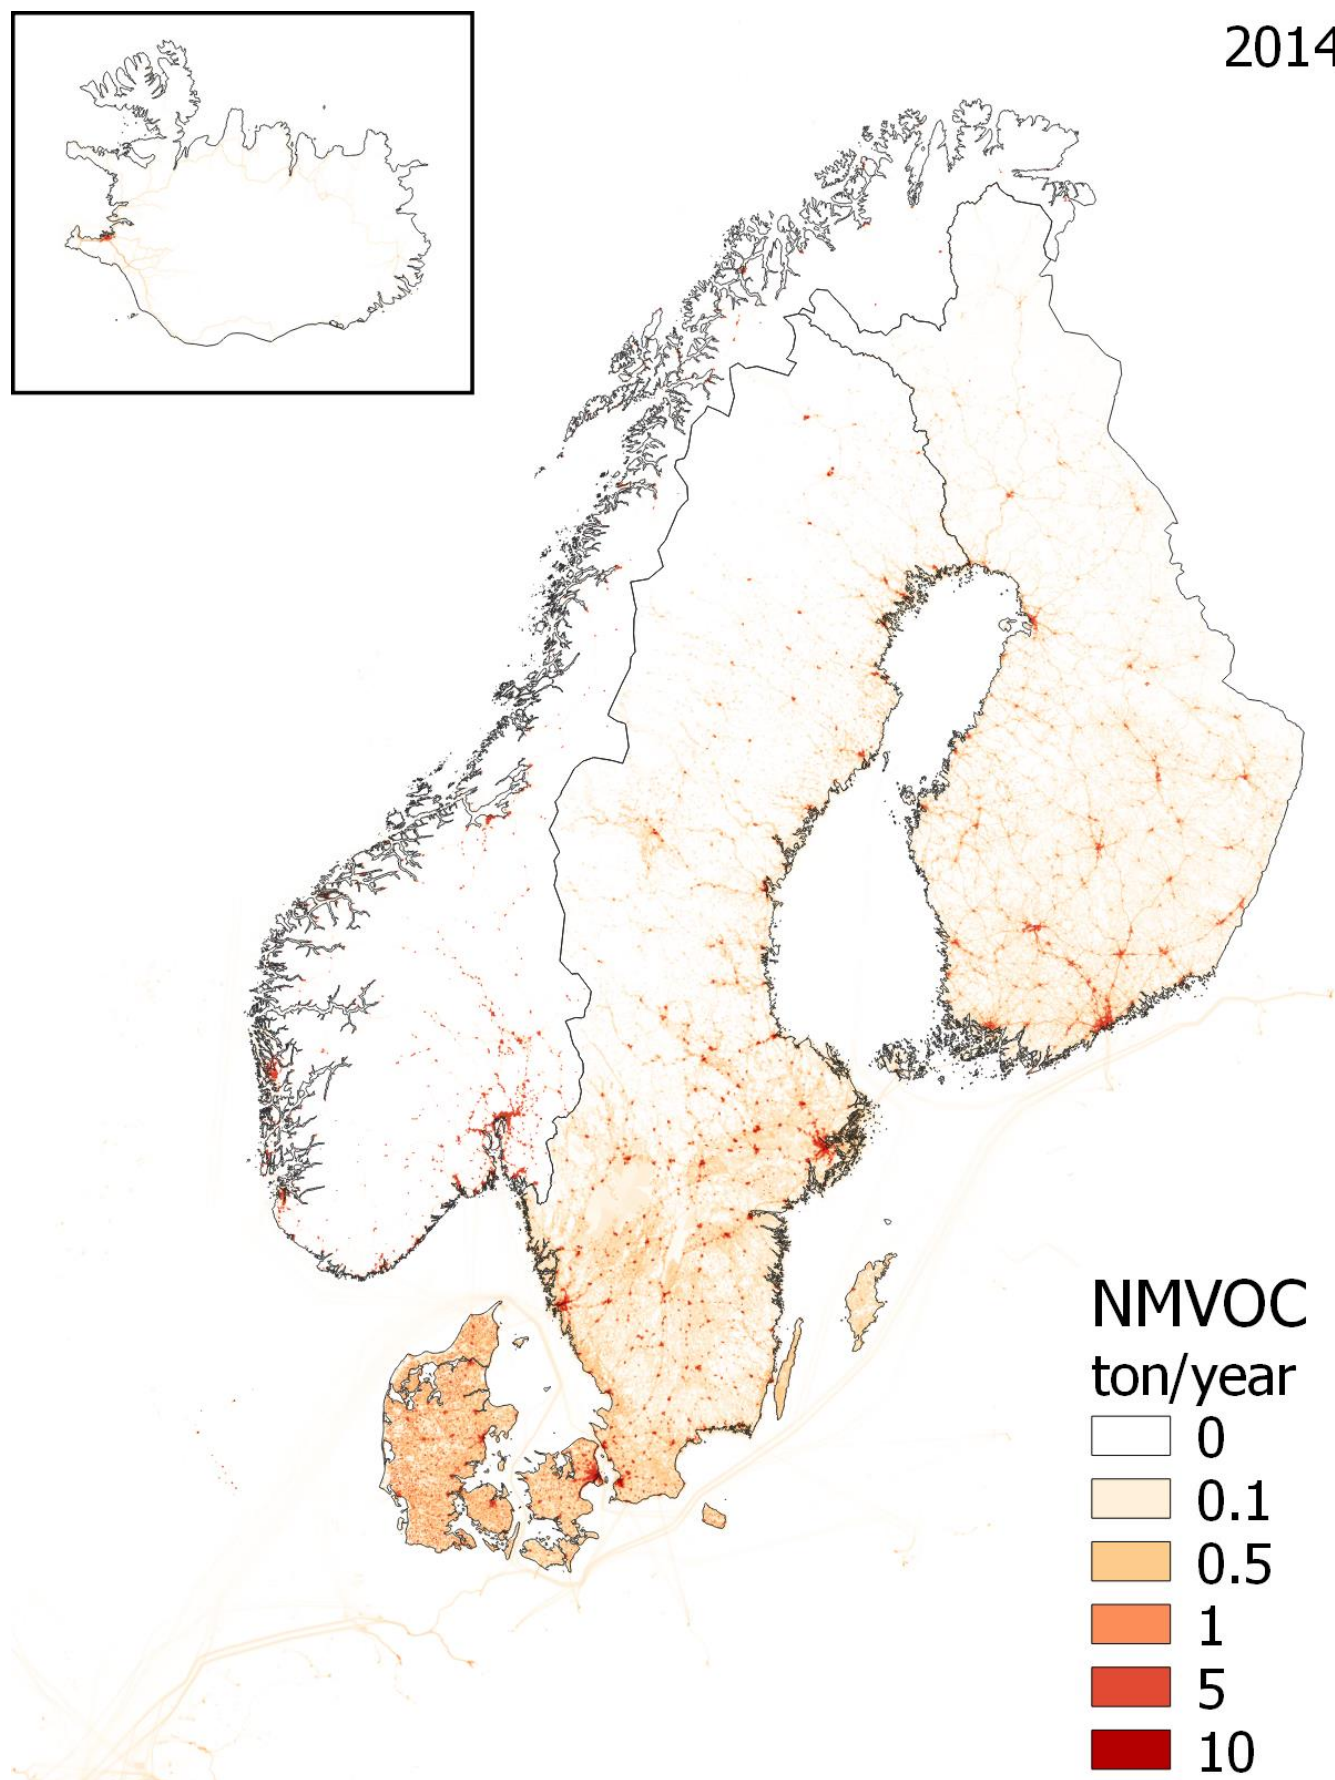

**Figure S9** Total non-methane volatile organic compounds emissions in the Nordic countries in 2014 in 1 km x 1 km resolution. The map also shows the spatial extent of shipping emissions in the Nordic inventory. The legend shows the colours at the exact emissions values, and colours between these values are interpolated.
