# Supplementary material for: Air pollution emission inventory using national high-resolution spatial parameters for the Nordic countries and analysis of PM 2.5 spatial distribution for road transport and machinery and off-road sectors
Source: Copernicus journal article supplement (doi:10.5194/essd-16-1453-2024), 2024-03-15
Supplement: Supplementary file 1 [file essd-16-1453-2024-supplement.zip › essd-2023-366_Supplement_S3_Emission_tables.xlsx]

## Sheet: RawEmissionData
Country	Year	SNAP sector	Pollutant	Emissions [ton/year]
DNK	1990	1	BC	36.8984
DNK	1995	1	BC	45.049
DNK	2000	1	BC	44.5802
DNK	2005	1	BC	35.9749
DNK	2010	1	BC	36.5093
DNK	2012	1	BC	30.4197
DNK	2014	1	BC	29.0099
DNK	1990	2	BC	2153.37
DNK	1995	2	BC	2134.19
DNK	2000	2	BC	1937.51
DNK	2005	2	BC	2398.89
DNK	2010	2	BC	2728.6
DNK	2012	2	BC	2385.02
DNK	2014	2	BC	2218.33
DNK	1990	3	BC	79.5341
DNK	1995	3	BC	65.8205
DNK	2000	3	BC	67.4904
DNK	2005	3	BC	41.0994
DNK	2010	3	BC	53.1223
DNK	2012	3	BC	50.8178
DNK	2014	3	BC	21.2538
DNK	1990	4	BC	8.23025
DNK	1995	4	BC	7.59208
DNK	2000	4	BC	7.95591
DNK	2005	4	BC	1.79789
DNK	2010	4	BC	1.48095
DNK	2012	4	BC	1.29519
DNK	2014	4	BC	1.42968
DNK	1990	5	BC	1025.53
DNK	1995	5	BC	1300.87
DNK	2000	5	BC	641.507
DNK	2005	5	BC	603.19
DNK	2010	5	BC	457.037
DNK	2012	5	BC	397.786
DNK	2014	5	BC	453.291
DNK	1990	6	BC	4.04428
DNK	1995	6	BC	4.28798
DNK	2000	6	BC	6.74931
DNK	2005	6	BC	7.40454
DNK	2010	6	BC	4.12846
DNK	2012	6	BC	6.97702
DNK	2014	6	BC	5.57204
DNK	1990	8	BC	2281.08
DNK	1995	8	BC	1933.84
DNK	2000	8	BC	1384.86
DNK	2005	8	BC	1136.22
DNK	2010	8	BC	874.232
DNK	2012	8	BC	747.52
DNK	2014	8	BC	591.957
DNK	1990	9	BC	0.9078
DNK	1995	9	BC	1.23597
DNK	2000	9	BC	1.95458
DNK	2005	9	BC	1.47997
DNK	2010	9	BC	0.976313
DNK	2012	9	BC	0.631839
DNK	2014	9	BC	0.72981
DNK	1990	10	BC	16.0816
DNK	1995	10	BC	19.0506
DNK	2000	10	BC	23.6567
DNK	2005	10	BC	26.45
DNK	2010	10	BC	18.4457
DNK	2012	10	BC	20.9817
DNK	2014	10	BC	22.3261
DNK	1990	7	BC	2075.33
DNK	1995	7	BC	2203.06
DNK	2000	7	BC	1714.44
DNK	2005	7	BC	1553.51
DNK	2010	7	BC	1174.26
DNK	2012	7	BC	908.594
DNK	2014	7	BC	705.205
DNK	1990	7	BC	105.65
DNK	1995	7	BC	121.925
DNK	2000	7	BC	134.055
DNK	2005	7	BC	148.787
DNK	2010	7	BC	150.317
DNK	2012	7	BC	149.353
DNK	2014	7	BC	152.88
DNK	1990	1	CO	8121.8
DNK	1995	1	CO	10838.1
DNK	2000	1	CO	11046.2
DNK	2005	1	CO	9392.62
DNK	2010	1	CO	11810.8
DNK	2012	1	CO	11134.2
DNK	2014	1	CO	10150.5
DNK	1990	2	CO	134423
DNK	1995	2	CO	121806
DNK	2000	2	CO	87417.8
DNK	2005	2	CO	110254
DNK	2010	2	CO	114334
DNK	2012	2	CO	93125.5
DNK	2014	2	CO	80496.1
DNK	1990	3	CO	16222.3
DNK	1995	3	CO	15990.3
DNK	2000	3	CO	18218.1
DNK	2005	3	CO	16189
DNK	2010	3	CO	4026.13
DNK	2012	3	CO	3892.85
DNK	2014	3	CO	3530.74
DNK	1990	4	CO	306.133
DNK	1995	4	CO	379.518
DNK	2000	4	CO	354.233
DNK	2005	4	CO	467.174
DNK	2010	4	CO	361.526
DNK	2012	4	CO	388.945
DNK	2014	4	CO	412.585
DNK	1990	5	CO	5.35387
DNK	1995	5	CO	0.0028645
DNK	2000	5	CO	0.105555
DNK	2005	5	CO	1.32265
DNK	2010	5	CO	0
DNK	2012	5	CO	0
DNK	2014	5	CO	0
DNK	1990	6	CO	2288.02
DNK	1995	6	CO	2388.13
DNK	2000	6	CO	3590.12
DNK	2005	6	CO	4029.07
DNK	2010	6	CO	2531.81
DNK	2012	6	CO	3720.75
DNK	2014	6	CO	3052.75
DNK	1990	8	CO	79311.7
DNK	1995	8	CO	63715.8
DNK	2000	8	CO	52261.2
DNK	2005	8	CO	59512.3
DNK	2010	8	CO	71280.1
DNK	2012	8	CO	65853
DNK	2014	8	CO	62513.7
DNK	1990	9	CO	1164.12
DNK	1995	9	CO	1383.41
DNK	2000	9	CO	1643.64
DNK	2005	9	CO	1549.41
DNK	2010	9	CO	1345.88
DNK	2012	9	CO	1168.1
DNK	2014	9	CO	1199.44
DNK	1990	10	CO	2145.29
DNK	1995	10	CO	2541.35
DNK	2000	10	CO	3155.8
DNK	2005	10	CO	3528.43
DNK	2010	10	CO	2460.65
DNK	2012	10	CO	2798.95
DNK	2014	10	CO	2978.31
DNK	1990	7	CO	462671
DNK	1995	7	CO	412056
DNK	2000	7	CO	279111
DNK	2005	7	CO	203925
DNK	2010	7	CO	131296
DNK	2012	7	CO	99140.2
DNK	2014	7	CO	80304.2
DNK	1990	7	CO	0
DNK	1995	7	CO	0
DNK	2000	7	CO	0
DNK	2005	7	CO	0
DNK	2010	7	CO	0
DNK	2012	7	CO	0
DNK	2014	7	CO	0
DNK	1990	1	NH3	0.2871
DNK	1995	1	NH3	3.05876
DNK	2000	1	NH3	8.65145
DNK	2005	1	NH3	10.2767
DNK	2010	1	NH3	10.8028
DNK	2012	1	NH3	14.8122
DNK	2014	1	NH3	14.3601
DNK	1990	2	NH3	1200.23
DNK	1995	2	NH3	1245.06
DNK	2000	2	NH3	1214.65
DNK	2005	2	NH3	1644.69
DNK	2010	2	NH3	1959.23
DNK	2012	2	NH3	1701.35
DNK	2014	2	NH3	1605.9
DNK	1990	3	NH3	768.702
DNK	1995	3	NH3	724.537
DNK	2000	3	NH3	685.009
DNK	2005	3	NH3	617.098
DNK	2010	3	NH3	547.637
DNK	2012	3	NH3	556.483
DNK	2014	3	NH3	490.3
DNK	1990	4	NH3	67.0487
DNK	1995	4	NH3	131.558
DNK	2000	4	NH3	72.1168
DNK	2005	4	NH3	128.87
DNK	2010	4	NH3	158.417
DNK	2012	4	NH3	47.5525
DNK	2014	4	NH3	43.2096
DNK	1990	5	NH3	0
DNK	1995	5	NH3	0
DNK	2000	5	NH3	0
DNK	2005	5	NH3	0
DNK	2010	5	NH3	0
DNK	2012	5	NH3	0
DNK	2014	5	NH3	0
DNK	1990	6	NH3	55.1571
DNK	1995	6	NH3	49.3936
DNK	2000	6	NH3	48.6184
DNK	2005	6	NH3	44.8806
DNK	2010	6	NH3	40.2623
DNK	2012	6	NH3	37.3143
DNK	2014	6	NH3	32.2025
DNK	1990	8	NH3	5.5129
DNK	1995	8	NH3	5.89011
DNK	2000	8	NH3	5.19658
DNK	2005	8	NH3	6.37728
DNK	2010	8	NH3	6.89315
DNK	2012	8	NH3	6.74692
DNK	2014	8	NH3	6.51513
DNK	1990	9	NH3	207.115
DNK	1995	9	NH3	273.961
DNK	2000	9	NH3	540.962
DNK	2005	9	NH3	529.533
DNK	2010	9	NH3	608.421
DNK	2012	9	NH3	563.584
DNK	2014	9	NH3	595.622
DNK	1990	10	NH3	123553
DNK	1995	10	NH3	104221
DNK	2000	10	NH3	91952.9
DNK	2005	10	NH3	83120.9
DNK	2010	10	NH3	74515.6
DNK	2012	10	NH3	72252.5
DNK	2014	10	NH3	70518.8
DNK	1990	7	NH3	71.3303
DNK	1995	7	NH3	1062.98
DNK	2000	7	NH3	2514.99
DNK	2005	7	NH3	2423.01
DNK	2010	7	NH3	1789.14
DNK	2012	7	NH3	1461.72
DNK	2014	7	NH3	1206.42
DNK	1990	7	NH3	0
DNK	1995	7	NH3	0
DNK	2000	7	NH3	0
DNK	2005	7	NH3	0
DNK	2010	7	NH3	0
DNK	2012	7	NH3	0
DNK	2014	7	NH3	0
DNK	1990	1	NMVOC	425.528
DNK	1995	1	NMVOC	2894.75
DNK	2000	1	NMVOC	3579.23
DNK	2005	1	NMVOC	2641.65
DNK	2010	1	NMVOC	2435.61
DNK	2012	1	NMVOC	1484.11
DNK	2014	1	NMVOC	983.979
DNK	1990	2	NMVOC	14964
DNK	1995	2	NMVOC	15438.9
DNK	2000	2	NMVOC	13993.5
DNK	2005	2	NMVOC	16852.9
DNK	2010	2	NMVOC	17700
DNK	2012	2	NMVOC	14649.2
DNK	2014	2	NMVOC	12791.1
DNK	1990	3	NMVOC	2031.72
DNK	1995	3	NMVOC	1693.98
DNK	2000	3	NMVOC	1324.24
DNK	2005	3	NMVOC	1002.76
DNK	2010	3	NMVOC	1220.26
DNK	2012	3	NMVOC	952.235
DNK	2014	3	NMVOC	653.483
DNK	1990	4	NMVOC	7927.05
DNK	1995	4	NMVOC	9094.05
DNK	2000	4	NMVOC	7787.17
DNK	2005	4	NMVOC	6942.13
DNK	2010	4	NMVOC	8344.53
DNK	2012	4	NMVOC	8331.65
DNK	2014	4	NMVOC	8307.91
DNK	1990	5	NMVOC	7903.84
DNK	1995	5	NMVOC	6098.89
DNK	2000	5	NMVOC	12530.3
DNK	2005	5	NMVOC	12584.7
DNK	2010	5	NMVOC	5291.87
DNK	2012	5	NMVOC	4632.33
DNK	2014	5	NMVOC	3629.71
DNK	1990	6	NMVOC	38493.6
DNK	1995	6	NMVOC	45718.4
DNK	2000	6	NMVOC	41674.8
DNK	2005	6	NMVOC	31866.9
DNK	2010	6	NMVOC	27304.6
DNK	2012	6	NMVOC	26938.3
DNK	2014	6	NMVOC	25300.1
DNK	1990	8	NMVOC	10297.1
DNK	1995	8	NMVOC	8531.61
DNK	2000	8	NMVOC	7217.67
DNK	2005	8	NMVOC	6853.54
DNK	2010	8	NMVOC	5616.9
DNK	2012	8	NMVOC	4934.49
DNK	2014	8	NMVOC	4434.65
DNK	1990	9	NMVOC	2170.85
DNK	1995	9	NMVOC	1716.01
DNK	2000	9	NMVOC	1555.92
DNK	2005	9	NMVOC	750.387
DNK	2010	9	NMVOC	659.836
DNK	2012	9	NMVOC	689.743
DNK	2014	9	NMVOC	682.368
DNK	1990	10	NMVOC	40014.5
DNK	1995	10	NMVOC	38333
DNK	2000	10	NMVOC	37129.6
DNK	2005	10	NMVOC	36444.2
DNK	2010	10	NMVOC	36964.7
DNK	2012	10	NMVOC	37346.9
DNK	2014	10	NMVOC	37681.1
DNK	1990	7	NMVOC	48265.9
DNK	1995	7	NMVOC	46470.9
DNK	2000	7	NMVOC	32859.3
DNK	2005	7	NMVOC	21863.2
DNK	2010	7	NMVOC	12861
DNK	2012	7	NMVOC	9235.56
DNK	2014	7	NMVOC	7137.09
DNK	1990	7	NMVOC	15815.2
DNK	1995	7	NMVOC	12988
DNK	2000	7	NMVOC	7413.4
DNK	2005	7	NMVOC	3711.73
DNK	2010	7	NMVOC	1842.95
DNK	2012	7	NMVOC	1449.14
DNK	2014	7	NMVOC	1347.11
DNK	1990	1	NOx	94454.7
DNK	1995	1	NOx	88466.6
DNK	2000	1	NOx	50659.6
DNK	2005	1	NOx	46010.6
DNK	2010	1	NOx	27329.9
DNK	2012	1	NOx	21023.7
DNK	2014	1	NOx	16685
DNK	1990	2	NOx	7664.99
DNK	1995	2	NOx	8066.27
DNK	2000	2	NOx	7291.8
DNK	2005	2	NOx	7182.54
DNK	2010	2	NOx	6993.68
DNK	2012	2	NOx	5833.19
DNK	2014	2	NOx	5198.52
DNK	1990	3	NOx	13822
DNK	1995	3	NOx	15607.1
DNK	2000	3	NOx	16452.7
DNK	2005	3	NOx	13489.4
DNK	2010	3	NOx	6335.29
DNK	2012	3	NOx	5105.47
DNK	2014	3	NOx	4634.37
DNK	1990	4	NOx	914.79
DNK	1995	4	NOx	742.182
DNK	2000	4	NOx	533.603
DNK	2005	4	NOx	68.95
DNK	2010	4	NOx	16.75
DNK	2012	4	NOx	19.47
DNK	2014	4	NOx	23.2
DNK	1990	5	NOx	3.5596
DNK	1995	5	NOx	0.0019045
DNK	2000	5	NOx	0.0701801
DNK	2005	5	NOx	0.879387
DNK	2010	5	NOx	0
DNK	2012	5	NOx	0
DNK	2014	5	NOx	0
DNK	1990	6	NOx	45.1439
DNK	1995	6	NOx	45.1902
DNK	2000	6	NOx	61.226
DNK	2005	6	NOx	63.8569
DNK	2010	6	NOx	41.6796
DNK	2012	6	NOx	58.4756
DNK	2014	6	NOx	47.7687
DNK	1990	8	NOx	27199.3
DNK	1995	8	NOx	28970.7
DNK	2000	8	NOx	26938.9
DNK	2005	8	NOx	25952.9
DNK	2010	8	NOx	19901.9
DNK	2012	8	NOx	17386
DNK	2014	8	NOx	15060.5
DNK	1990	9	NOx	228.893
DNK	1995	9	NOx	291.911
DNK	2000	9	NOx	405.661
DNK	2005	9	NOx	341.865
DNK	2010	9	NOx	255.429
DNK	2012	9	NOx	193.551
DNK	2014	9	NOx	209.228
DNK	1990	10	NOx	25236.9
DNK	1995	10	NOx	21455.3
DNK	2000	10	NOx	18676.2
DNK	2005	10	NOx	17326.9
DNK	2010	10	NOx	16831.8
DNK	2012	10	NOx	16748.2
DNK	2014	10	NOx	17079.9
DNK	1990	7	NOx	111405
DNK	1995	7	NOx	106426
DNK	2000	7	NOx	84767
DNK	2005	7	NOx	72770
DNK	2010	7	NOx	52795.7
DNK	2012	7	NOx	45358.4
DNK	2014	7	NOx	40598.5
DNK	1990	7	NOx	0
DNK	1995	7	NOx	0
DNK	2000	7	NOx	0
DNK	2005	7	NOx	0
DNK	2010	7	NOx	0
DNK	2012	7	NOx	0
DNK	2014	7	NOx	0
DNK	1990	1	OC	39.1123
DNK	1995	1	OC	36.4788
DNK	2000	1	OC	29.815
DNK	2005	1	OC	26.1193
DNK	2010	1	OC	25.9927
DNK	2012	1	OC	23.9875
DNK	2014	1	OC	24.7661
DNK	1990	2	OC	3608.06
DNK	1995	2	OC	3841.52
DNK	2000	2	OC	3587.82
DNK	2005	2	OC	4680.96
DNK	2010	2	OC	5042.11
DNK	2012	2	OC	4228.08
DNK	2014	2	OC	3789.52
DNK	1990	3	OC	26.5579
DNK	1995	3	OC	22.3187
DNK	2000	3	OC	21.8665
DNK	2005	3	OC	15.3845
DNK	2010	3	OC	12.614
DNK	2012	3	OC	11.4001
DNK	2014	3	OC	9.40811
DNK	1990	4	OC	42.2116
DNK	1995	4	OC	44.2716
DNK	2000	4	OC	51.4789
DNK	2005	4	OC	41.6801
DNK	2010	4	OC	33.5168
DNK	2012	4	OC	34.5247
DNK	2014	4	OC	33.6966
DNK	1990	5	OC	36.9913
DNK	1995	5	OC	46.8315
DNK	2000	5	OC	23.0957
DNK	2005	5	OC	21.7326
DNK	2010	5	OC	16.4533
DNK	2012	5	OC	14.3203
DNK	2014	5	OC	16.3185
DNK	1990	6	OC	47.4308
DNK	1995	6	OC	51.2931
DNK	2000	6	OC	63.2903
DNK	2005	6	OC	61.7468
DNK	2010	6	OC	61.8413
DNK	2012	6	OC	53.9073
DNK	2014	6	OC	49.9538
DNK	1990	8	OC	1510.38
DNK	1995	8	OC	1275.97
DNK	2000	8	OC	910.516
DNK	2005	8	OC	712.06
DNK	2010	8	OC	514.148
DNK	2012	8	OC	434.723
DNK	2014	8	OC	344.036
DNK	1990	9	OC	9.04837
DNK	1995	9	OC	10.0904
DNK	2000	9	OC	9.41676
DNK	2005	9	OC	9.13487
DNK	2010	9	OC	8.2428
DNK	2012	9	OC	6.78168
DNK	2014	9	OC	6.49128
DNK	1990	10	OC	197.154
DNK	1995	10	OC	189.841
DNK	2000	10	OC	190.372
DNK	2005	10	OC	175.748
DNK	2010	10	OC	171.189
DNK	2012	10	OC	173.342
DNK	2014	10	OC	175.766
DNK	1990	7	OC	879.384
DNK	1995	7	OC	907.164
DNK	2000	7	OC	648.995
DNK	2005	7	OC	515.543
DNK	2010	7	OC	355.115
DNK	2012	7	OC	272.16
DNK	2014	7	OC	213.209
DNK	1990	7	OC	124.67
DNK	1995	7	OC	143.534
DNK	2000	7	OC	156.705
DNK	2005	7	OC	172.477
DNK	2010	7	OC	173.286
DNK	2012	7	OC	172.235
DNK	2014	7	OC	176.021
DNK	1990	1	PM10	954.055
DNK	1995	1	PM10	1157.69
DNK	2000	1	PM10	962.068
DNK	2005	1	PM10	782.629
DNK	2010	1	PM10	695.833
DNK	2012	1	PM10	617.623
DNK	2014	1	PM10	650.185
DNK	1990	2	PM10	12790.5
DNK	1995	2	PM10	13600.5
DNK	2000	2	PM10	12694.6
DNK	2005	2	PM10	16545
DNK	2010	2	PM10	17768.3
DNK	2012	2	PM10	14894.5
DNK	2014	2	PM10	13342.7
DNK	1990	3	PM10	806.208
DNK	1995	3	PM10	769.442
DNK	2000	3	PM10	824.751
DNK	2005	3	PM10	558.039
DNK	2010	3	PM10	402.502
DNK	2012	3	PM10	405.803
DNK	2014	3	PM10	361.58
DNK	1990	4	PM10	2708.32
DNK	1995	4	PM10	2791.82
DNK	2000	4	PM10	3519.82
DNK	2005	4	PM10	3295.3
DNK	2010	4	PM10	2649.56
DNK	2012	4	PM10	2667.46
DNK	2014	4	PM10	2511.96
DNK	1990	5	PM10	615.427
DNK	1995	5	PM10	780.525
DNK	2000	5	PM10	384.906
DNK	2005	5	PM10	361.941
DNK	2010	5	PM10	274.222
DNK	2012	5	PM10	238.671
DNK	2014	5	PM10	271.975
DNK	1990	6	PM10	257.445
DNK	1995	6	PM10	304.024
DNK	2000	6	PM10	393.468
DNK	2005	6	PM10	367.174
DNK	2010	6	PM10	395.229
DNK	2012	6	PM10	324.808
DNK	2014	6	PM10	309.084
DNK	1990	8	PM10	4195.5
DNK	1995	8	PM10	3544.35
DNK	2000	8	PM10	2529.21
DNK	2005	8	PM10	1977.94
DNK	2010	8	PM10	1428.19
DNK	2012	8	PM10	1207.56
DNK	2014	8	PM10	955.657
DNK	1990	9	PM10	312.204
DNK	1995	9	PM10	348.159
DNK	2000	9	PM10	324.974
DNK	2005	9	PM10	315.321
DNK	2010	9	PM10	284.716
DNK	2012	9	PM10	234.125
DNK	2014	9	PM10	224.094
DNK	1990	10	PM10	9398.74
DNK	1995	10	PM10	9010.53
DNK	2000	10	PM10	9119.88
DNK	2005	10	PM10	8271.19
DNK	2010	10	PM10	8421.74
DNK	2012	10	PM10	8278.69
DNK	2014	10	PM10	8305.85
DNK	1990	7	PM10	3997.2
DNK	1995	7	PM10	4123.47
DNK	2000	7	PM10	2949.98
DNK	2005	7	PM10	2343.38
DNK	2010	7	PM10	1614.16
DNK	2012	7	PM10	1237.09
DNK	2014	7	PM10	969.13
DNK	1990	7	PM10	1142.43
DNK	1995	7	PM10	1314.06
DNK	2000	7	PM10	1432.32
DNK	2005	7	PM10	1573.46
DNK	2010	7	PM10	1577.27
DNK	2012	7	PM10	1565.94
DNK	2014	7	PM10	1597.15
DNK	1990	1	PM2.5	789.495
DNK	1995	1	PM2.5	964.615
DNK	2000	1	PM2.5	818.724
DNK	2005	1	PM2.5	644.393
DNK	2010	1	PM2.5	571.55
DNK	2012	1	PM2.5	506.653
DNK	2014	1	PM2.5	525.759
DNK	1990	2	PM2.5	12441.6
DNK	1995	2	PM2.5	13246.6
DNK	2000	2	PM2.5	12382.7
DNK	2005	2	PM2.5	16145.4
DNK	2010	2	PM2.5	17386.8
DNK	2012	2	PM2.5	14579.6
DNK	2014	2	PM2.5	13067.3
DNK	1990	3	PM2.5	495.156
DNK	1995	3	PM2.5	463.869
DNK	2000	3	PM2.5	484.479
DNK	2005	3	PM2.5	329.162
DNK	2010	3	PM2.5	257.078
DNK	2012	3	PM2.5	262.209
DNK	2014	3	PM2.5	208.947
DNK	1990	4	PM2.5	811.142
DNK	1995	4	PM2.5	809.594
DNK	2000	4	PM2.5	898.04
DNK	2005	4	PM2.5	538.724
DNK	2010	4	PM2.5	432.675
DNK	2012	4	PM2.5	435.512
DNK	2014	4	PM2.5	427.479
DNK	1990	5	PM2.5	61.6521
DNK	1995	5	PM2.5	78.0525
DNK	2000	5	PM2.5	38.4928
DNK	2005	5	PM2.5	36.2211
DNK	2010	5	PM2.5	27.4222
DNK	2012	5	PM2.5	23.8671
DNK	2014	5	PM2.5	27.1975
DNK	1990	6	PM2.5	237.154
DNK	1995	6	PM2.5	256.465
DNK	2000	6	PM2.5	316.451
DNK	2005	6	PM2.5	308.734
DNK	2010	6	PM2.5	309.207
DNK	2012	6	PM2.5	269.537
DNK	2014	6	PM2.5	249.769
DNK	1990	8	PM2.5	4195.5
DNK	1995	8	PM2.5	3544.35
DNK	2000	8	PM2.5	2529.21
DNK	2005	8	PM2.5	1977.94
DNK	2010	8	PM2.5	1428.19
DNK	2012	8	PM2.5	1207.56
DNK	2014	8	PM2.5	955.657
DNK	1990	9	PM2.5	312.013
DNK	1995	9	PM2.5	347.946
DNK	2000	9	PM2.5	324.716
DNK	2005	9	PM2.5	314.996
DNK	2010	9	PM2.5	284.235
DNK	2012	9	PM2.5	233.851
DNK	2014	9	PM2.5	223.837
DNK	1990	10	PM2.5	1408.24
DNK	1995	10	PM2.5	1356
DNK	2000	10	PM2.5	1359.8
DNK	2005	10	PM2.5	1255.34
DNK	2010	10	PM2.5	1222.77
DNK	2012	10	PM2.5	1238.16
DNK	2014	10	PM2.5	1255.47
DNK	1990	7	PM2.5	3997.2
DNK	1995	7	PM2.5	4123.47
DNK	2000	7	PM2.5	2949.98
DNK	2005	7	PM2.5	2343.38
DNK	2010	7	PM2.5	1614.16
DNK	2012	7	PM2.5	1237.09
DNK	2014	7	PM2.5	969.13
DNK	1990	7	PM2.5	623.35
DNK	1995	7	PM2.5	717.667
DNK	2000	7	PM2.5	783.525
DNK	2005	7	PM2.5	862.384
DNK	2010	7	PM2.5	866.432
DNK	2012	7	PM2.5	861.173
DNK	2014	7	PM2.5	880.105
DNK	1990	1	SOx	126849
DNK	1995	1	SOx	110382
DNK	2000	1	SOx	12585.2
DNK	2005	1	SOx	7925.72
DNK	2010	1	SOx	3852.33
DNK	2012	1	SOx	3046.85
DNK	2014	1	SOx	2463.86
DNK	1990	2	SOx	11101.6
DNK	1995	2	SOx	5528.27
DNK	2000	2	SOx	3067.22
DNK	2005	2	SOx	2951.36
DNK	2010	2	SOx	2419.48
DNK	2012	2	SOx	2175.02
DNK	2014	2	SOx	1691.91
DNK	1990	3	SOx	15163
DNK	1995	3	SOx	11576.3
DNK	2000	3	SOx	6949.45
DNK	2005	3	SOx	6022.76
DNK	2010	3	SOx	3530.23
DNK	2012	3	SOx	2502.01
DNK	2014	3	SOx	2587.22
DNK	1990	4	SOx	7344.48
DNK	1995	4	SOx	7162.99
DNK	2000	4	SOx	4653.29
DNK	2005	4	SOx	3935.48
DNK	2010	4	SOx	2527.72
DNK	2012	4	SOx	2310.24
DNK	2014	4	SOx	1166.76
DNK	1990	5	SOx	0.0376218
DNK	1995	5	SOx	2.01289e-05
DNK	2000	5	SOx	0.000741741
DNK	2005	5	SOx	0.00929433
DNK	2010	5	SOx	0
DNK	2012	5	SOx	0
DNK	2014	5	SOx	0
DNK	1990	6	SOx	30.0022
DNK	1995	6	SOx	35.0016
DNK	2000	6	SOx	55.4033
DNK	2005	6	SOx	57.6178
DNK	2010	6	SOx	38.6187
DNK	2012	6	SOx	54.3241
DNK	2014	6	SOx	45.2316
DNK	1990	8	SOx	2784.78
DNK	1995	8	SOx	2422.58
DNK	2000	8	SOx	502.913
DNK	2005	8	SOx	211.969
DNK	2010	8	SOx	180.261
DNK	2012	8	SOx	130.053
DNK	2014	8	SOx	137.305
DNK	1990	9	SOx	1690.52
DNK	1995	9	SOx	1059.2
DNK	2000	9	SOx	807.293
DNK	2005	9	SOx	1025.31
DNK	2010	9	SOx	857.996
DNK	2012	9	SOx	712.765
DNK	2014	9	SOx	897.984
DNK	1990	10	SOx	16.0816
DNK	1995	10	SOx	19.0506
DNK	2000	10	SOx	23.6567
DNK	2005	10	SOx	26.45
DNK	2010	10	SOx	18.4457
DNK	2012	10	SOx	20.9817
DNK	2014	10	SOx	22.3261
DNK	1990	7	SOx	5769.25
DNK	1995	7	SOx	1684.34
DNK	2000	7	SOx	354.723
DNK	2005	7	SOx	77.6917
DNK	2010	7	SOx	76.9696
DNK	2012	7	SOx	71.5733
DNK	2014	7	SOx	71.7263
DNK	1990	7	SOx	0
DNK	1995	7	SOx	0
DNK	2000	7	SOx	0
DNK	2005	7	SOx	0
DNK	2010	7	SOx	0
DNK	2012	7	SOx	0
DNK	2014	7	SOx	0
FIN	1990	1	BC	25.05
FIN	1995	1	BC	17.325
FIN	2000	1	BC	114.59
FIN	2005	1	BC	251.207
FIN	2010	1	BC	43.8246
FIN	2012	1	BC	22.5755
FIN	2014	1	BC	5.507
FIN	1990	2	BC	2211.7
FIN	1995	2	BC	2209.78
FIN	2000	2	BC	2207.85
FIN	2005	2	BC	2595.3
FIN	2010	2	BC	3145.99
FIN	2012	2	BC	3117.17
FIN	2014	2	BC	2849.1
FIN	1990	3	BC	174.745
FIN	1995	3	BC	142.325
FIN	2000	3	BC	79.7998
FIN	2005	3	BC	95.1573
FIN	2010	3	BC	22.1904
FIN	2012	3	BC	22.1904
FIN	2014	3	BC	18.2498
FIN	1990	4	BC	275.675
FIN	1995	4	BC	62.3
FIN	2000	4	BC	34.959
FIN	2005	4	BC	39.6681
FIN	2010	4	BC	92.1762
FIN	2012	4	BC	92.1762
FIN	2014	4	BC	75.8073
FIN	1990	5	BC	0
FIN	1995	5	BC	0
FIN	2000	5	BC	0
FIN	2005	5	BC	0
FIN	2010	5	BC	0
FIN	2012	5	BC	0
FIN	2014	5	BC	0
FIN	1990	6	BC	0
FIN	1995	6	BC	0
FIN	2000	6	BC	0.84191
FIN	2005	6	BC	0.699012
FIN	2010	6	BC	0.771991
FIN	2012	6	BC	0.672013
FIN	2014	6	BC	0.620857
FIN	1990	8	BC	2062.49
FIN	1995	8	BC	1960.8
FIN	2000	8	BC	1919.69
FIN	2005	8	BC	1234.82
FIN	2010	8	BC	791.506
FIN	2012	8	BC	742.843
FIN	2014	8	BC	616.205
FIN	1990	9	BC	0
FIN	1995	9	BC	0
FIN	2000	9	BC	0.000156018
FIN	2005	9	BC	0.000193956
FIN	2010	9	BC	1.54006
FIN	2012	9	BC	0.00380901
FIN	2014	9	BC	0.0157171
FIN	1990	10	BC	37.1509
FIN	1995	10	BC	30.9812
FIN	2000	10	BC	31.9718
FIN	2005	10	BC	26.8455
FIN	2010	10	BC	15.9603
FIN	2012	10	BC	18.0474
FIN	2014	10	BC	23.6982
FIN	1990	7	BC	4238.7
FIN	1995	7	BC	3340.92
FIN	2000	7	BC	2375.86
FIN	2005	7	BC	1601.89
FIN	2010	7	BC	931.294
FIN	2012	7	BC	752.072
FIN	2014	7	BC	624.128
FIN	1990	7	BC	0
FIN	1995	7	BC	0
FIN	2000	7	BC	209.998
FIN	2005	7	BC	232.998
FIN	2010	7	BC	241.998
FIN	2012	7	BC	243.998
FIN	2014	7	BC	227.791
FIN	1990	1	CO	46410
FIN	1995	1	CO	39010
FIN	2000	1	CO	67154.1
FIN	2005	1	CO	71715.4
FIN	2010	1	CO	61782
FIN	2012	1	CO	57656.8
FIN	2014	1	CO	52387.5
FIN	1990	2	CO	146281
FIN	1995	2	CO	144023
FIN	2000	2	CO	141766
FIN	2005	2	CO	166023
FIN	2010	2	CO	208608
FIN	2012	2	CO	206697
FIN	2014	2	CO	188743
FIN	1990	3	CO	0
FIN	1995	3	CO	0
FIN	2000	3	CO	0
FIN	2005	3	CO	0
FIN	2010	3	CO	0
FIN	2012	3	CO	0
FIN	2014	3	CO	0
FIN	1990	4	CO	0
FIN	1995	4	CO	0
FIN	2000	4	CO	0
FIN	2005	4	CO	0
FIN	2010	4	CO	0
FIN	2012	4	CO	0
FIN	2014	4	CO	0
FIN	1990	5	CO	0
FIN	1995	5	CO	0
FIN	2000	5	CO	0
FIN	2005	5	CO	0
FIN	2010	5	CO	0
FIN	2012	5	CO	0
FIN	2014	5	CO	0
FIN	1990	6	CO	0
FIN	1995	6	CO	0
FIN	2000	6	CO	4915.9
FIN	2005	6	CO	0
FIN	2010	6	CO	1
FIN	2012	6	CO	12.2551
FIN	2014	6	CO	9.40878
FIN	1990	8	CO	103330
FIN	1995	8	CO	104209
FIN	2000	8	CO	82992.3
FIN	2005	8	CO	89609.3
FIN	2010	8	CO	82254.7
FIN	2012	8	CO	88151.6
FIN	2014	8	CO	85336.2
FIN	1990	9	CO	10
FIN	1995	9	CO	200
FIN	2000	9	CO	16.6
FIN	2005	9	CO	121.562
FIN	2010	9	CO	34
FIN	2012	9	CO	21.63
FIN	2014	9	CO	34.1322
FIN	1990	10	CO	3694.15
FIN	1995	10	CO	3079.94
FIN	2000	10	CO	3248.83
FIN	2005	10	CO	2689.42
FIN	2010	10	CO	1647.77
FIN	2012	10	CO	1881.39
FIN	2014	10	CO	2332.47
FIN	1990	7	CO	468067
FIN	1995	7	CO	372611
FIN	2000	7	CO	290695
FIN	2005	7	CO	187334
FIN	2010	7	CO	100835
FIN	2012	7	CO	77807.9
FIN	2014	7	CO	65367.8
FIN	1990	7	CO	0
FIN	1995	7	CO	0
FIN	2000	7	CO	0
FIN	2005	7	CO	0
FIN	2010	7	CO	0
FIN	2012	7	CO	0
FIN	2014	7	CO	0
FIN	1990	1	NH3	1215.99
FIN	1995	1	NH3	944.594
FIN	2000	1	NH3	1078.97
FIN	2005	1	NH3	1005.57
FIN	2010	1	NH3	633.308
FIN	2012	1	NH3	532.659
FIN	2014	1	NH3	568.605
FIN	1990	2	NH3	0
FIN	1995	2	NH3	0
FIN	2000	2	NH3	0
FIN	2005	2	NH3	0
FIN	2010	2	NH3	0
FIN	2012	2	NH3	0
FIN	2014	2	NH3	0
FIN	1990	3	NH3	0
FIN	1995	3	NH3	0
FIN	2000	3	NH3	0
FIN	2005	3	NH3	0
FIN	2010	3	NH3	0
FIN	2012	3	NH3	0
FIN	2014	3	NH3	0
FIN	1990	4	NH3	0
FIN	1995	4	NH3	0
FIN	2000	4	NH3	0
FIN	2005	4	NH3	0
FIN	2010	4	NH3	0
FIN	2012	4	NH3	0
FIN	2014	4	NH3	0
FIN	1990	5	NH3	0
FIN	1995	5	NH3	0
FIN	2000	5	NH3	0
FIN	2005	5	NH3	0
FIN	2010	5	NH3	0
FIN	2012	5	NH3	0
FIN	2014	5	NH3	0
FIN	1990	6	NH3	256.931
FIN	1995	6	NH3	249.431
FIN	2000	6	NH3	198.431
FIN	2005	6	NH3	238.361
FIN	2010	6	NH3	130.711
FIN	2012	6	NH3	164.781
FIN	2014	6	NH3	212.819
FIN	1990	8	NH3	3.60635
FIN	1995	8	NH3	3.61636
FIN	2000	8	NH3	4.36798
FIN	2005	8	NH3	4.35678
FIN	2010	8	NH3	4.10201
FIN	2012	8	NH3	4.44005
FIN	2014	8	NH3	4.35754
FIN	1990	9	NH3	309.539
FIN	1995	9	NH3	368.79
FIN	2000	9	NH3	421.385
FIN	2005	9	NH3	466.687
FIN	2010	9	NH3	480.167
FIN	2012	9	NH3	496.942
FIN	2014	9	NH3	491.347
FIN	1990	10	NH3	35143.1
FIN	1995	10	NH3	32825.2
FIN	2000	10	NH3	33210.2
FIN	2005	10	NH3	34654.2
FIN	2010	10	NH3	34277.3
FIN	2012	10	NH3	33567.4
FIN	2014	10	NH3	33547.4
FIN	1990	7	NH3	255.312
FIN	1995	7	NH3	955.617
FIN	2000	7	NH3	1918.26
FIN	2005	7	NH3	1995.64
FIN	2010	7	NH3	1613.27
FIN	2012	7	NH3	1424.86
FIN	2014	7	NH3	1292.58
FIN	1990	7	NH3	0
FIN	1995	7	NH3	0
FIN	2000	7	NH3	0
FIN	2005	7	NH3	0
FIN	2010	7	NH3	0
FIN	2012	7	NH3	0
FIN	2014	7	NH3	0
FIN	1990	1	NMVOC	28205.5
FIN	1995	1	NMVOC	21393.8
FIN	2000	1	NMVOC	16508.4
FIN	2005	1	NMVOC	14024.9
FIN	2010	1	NMVOC	8298.2
FIN	2012	1	NMVOC	5918.67
FIN	2014	1	NMVOC	5219.89
FIN	1990	2	NMVOC	15071.5
FIN	1995	2	NMVOC	14378.1
FIN	2000	2	NMVOC	13684.7
FIN	2005	2	NMVOC	15970.9
FIN	2010	2	NMVOC	18646.8
FIN	2012	2	NMVOC	18476
FIN	2014	2	NMVOC	16900.8
FIN	1990	3	NMVOC	0
FIN	1995	3	NMVOC	0
FIN	2000	3	NMVOC	0
FIN	2005	3	NMVOC	0
FIN	2010	3	NMVOC	0
FIN	2012	3	NMVOC	0
FIN	2014	3	NMVOC	0
FIN	1990	4	NMVOC	0
FIN	1995	4	NMVOC	0
FIN	2000	4	NMVOC	543.503
FIN	2005	4	NMVOC	629.85
FIN	2010	4	NMVOC	7336.12
FIN	2012	4	NMVOC	7336.12
FIN	2014	4	NMVOC	7336.12
FIN	1990	5	NMVOC	7755
FIN	1995	5	NMVOC	7472
FIN	2000	5	NMVOC	3608.3
FIN	2005	5	NMVOC	4054.41
FIN	2010	5	NMVOC	3627.62
FIN	2012	5	NMVOC	3122.57
FIN	2014	5	NMVOC	3002.86
FIN	1990	6	NMVOC	48247.5
FIN	1995	6	NMVOC	35592.8
FIN	2000	6	NMVOC	31983.6
FIN	2005	6	NMVOC	26716.8
FIN	2010	6	NMVOC	20445.4
FIN	2012	6	NMVOC	17876
FIN	2014	6	NMVOC	16225.6
FIN	1990	8	NMVOC	47927.8
FIN	1995	8	NMVOC	47875.6
FIN	2000	8	NMVOC	24585.6
FIN	2005	8	NMVOC	22438.2
FIN	2010	8	NMVOC	12177.6
FIN	2012	8	NMVOC	11550.1
FIN	2014	8	NMVOC	9700.45
FIN	1990	9	NMVOC	554.811
FIN	1995	9	NMVOC	569.378
FIN	2000	9	NMVOC	509.514
FIN	2005	9	NMVOC	517.042
FIN	2010	9	NMVOC	633.587
FIN	2012	9	NMVOC	609.724
FIN	2014	9	NMVOC	516.714
FIN	1990	10	NMVOC	252.998
FIN	1995	10	NMVOC	211.104
FIN	2000	10	NMVOC	205.809
FIN	2005	10	NMVOC	179.396
FIN	2010	10	NMVOC	98.3015
FIN	2012	10	NMVOC	108.049
FIN	2014	10	NMVOC	138.876
FIN	1990	7	NMVOC	82059.8
FIN	1995	7	NMVOC	66973.2
FIN	2000	7	NMVOC	51287.1
FIN	2005	7	NMVOC	31365
FIN	2010	7	NMVOC	16549.4
FIN	2012	7	NMVOC	13208.8
FIN	2014	7	NMVOC	11260
FIN	1990	7	NMVOC	0
FIN	1995	7	NMVOC	0
FIN	2000	7	NMVOC	0
FIN	2005	7	NMVOC	0
FIN	2010	7	NMVOC	0
FIN	2012	7	NMVOC	0
FIN	2014	7	NMVOC	0
FIN	1990	1	NOx	39471.1
FIN	1995	1	NOx	39985
FIN	2000	1	NOx	36117.6
FIN	2005	1	NOx	27976.3
FIN	2010	1	NOx	49905.9
FIN	2012	1	NOx	38051
FIN	2014	1	NOx	34667.5
FIN	1990	2	NOx	3835.56
FIN	1995	2	NOx	3756.6
FIN	2000	2	NOx	3677.63
FIN	2005	2	NOx	4353.78
FIN	2010	2	NOx	5467.38
FIN	2012	2	NOx	5417.3
FIN	2014	2	NOx	5022.84
FIN	1990	3	NOx	22216.2
FIN	1995	3	NOx	20738
FIN	2000	3	NOx	21716.6
FIN	2005	3	NOx	24691.3
FIN	2010	3	NOx	19309.9
FIN	2012	3	NOx	19309.9
FIN	2014	3	NOx	19500.7
FIN	1990	4	NOx	6219
FIN	1995	4	NOx	10587
FIN	2000	4	NOx	6449.17
FIN	2005	4	NOx	7739.91
FIN	2010	4	NOx	7435.86
FIN	2012	4	NOx	7435.86
FIN	2014	4	NOx	7435.86
FIN	1990	5	NOx	0
FIN	1995	5	NOx	0
FIN	2000	5	NOx	0
FIN	2005	5	NOx	17.56
FIN	2010	5	NOx	0
FIN	2012	5	NOx	0.0100053
FIN	2014	5	NOx	0.799994
FIN	1990	6	NOx	0
FIN	1995	6	NOx	0
FIN	2000	6	NOx	20
FIN	2005	6	NOx	0
FIN	2010	6	NOx	0
FIN	2012	6	NOx	0.00833811
FIN	2014	6	NOx	0.00682509
FIN	1990	8	NOx	56861.6
FIN	1995	8	NOx	54808.2
FIN	2000	8	NOx	35863.2
FIN	2005	8	NOx	30861.2
FIN	2010	8	NOx	24648.8
FIN	2012	8	NOx	23115.2
FIN	2014	8	NOx	20228
FIN	1990	9	NOx	100
FIN	1995	9	NOx	200
FIN	2000	9	NOx	173
FIN	2005	9	NOx	235.535
FIN	2010	9	NOx	293
FIN	2012	9	NOx	360.95
FIN	2014	9	NOx	563.871
FIN	1990	10	NOx	112.924
FIN	1995	10	NOx	94.1376
FIN	2000	10	NOx	100.382
FIN	2005	10	NOx	82.5184
FIN	2010	10	NOx	51.3031
FIN	2012	10	NOx	58.846
FIN	2014	10	NOx	72.639
FIN	1990	7	NOx	134325
FIN	1995	7	NOx	110167
FIN	2000	7	NOx	92963.9
FIN	2005	7	NOx	74740.2
FIN	2010	7	NOx	49406.2
FIN	2012	7	NOx	43280.6
FIN	2014	7	NOx	38048.8
FIN	1990	7	NOx	0
FIN	1995	7	NOx	0
FIN	2000	7	NOx	0
FIN	2005	7	NOx	0
FIN	2010	7	NOx	0
FIN	2012	7	NOx	0
FIN	2014	7	NOx	0
FIN	1990	1	OC	854.057
FIN	1995	1	OC	191.611
FIN	2000	1	OC	231.016
FIN	2005	1	OC	106.256
FIN	2010	1	OC	33.6834
FIN	2012	1	OC	66.7262
FIN	2014	1	OC	47.8083
FIN	1990	2	OC	1990.54
FIN	1995	2	OC	2033.43
FIN	2000	2	OC	2076.31
FIN	2005	2	OC	2440.53
FIN	2010	2	OC	3225.9
FIN	2012	2	OC	3196.35
FIN	2014	2	OC	2935.3
FIN	1990	3	OC	202.704
FIN	1995	3	OC	165.097
FIN	2000	3	OC	92.5677
FIN	2005	3	OC	110.382
FIN	2010	3	OC	59.915
FIN	2012	3	OC	59.915
FIN	2014	3	OC	59.915
FIN	1990	4	OC	319.783
FIN	1995	4	OC	72.268
FIN	2000	4	OC	40.5525
FIN	2005	4	OC	46.015
FIN	2010	4	OC	188.951
FIN	2012	4	OC	188.951
FIN	2014	4	OC	188.951
FIN	1990	5	OC	650.761
FIN	1995	5	OC	912.982
FIN	2000	5	OC	461.079
FIN	2005	5	OC	987.088
FIN	2010	5	OC	839.253
FIN	2012	5	OC	486.261
FIN	2014	5	OC	730.899
FIN	1990	6	OC	80.3833
FIN	1995	6	OC	71.8922
FIN	2000	6	OC	15
FIN	2005	6	OC	29.9032
FIN	2010	6	OC	72.2
FIN	2012	6	OC	82.4172
FIN	2014	6	OC	88.5673
FIN	1990	8	OC	1332.85
FIN	1995	8	OC	1278.95
FIN	2000	8	OC	1256.63
FIN	2005	8	OC	864.643
FIN	2010	8	OC	563.176
FIN	2012	8	OC	515.101
FIN	2014	8	OC	437.416
FIN	1990	9	OC	5.34305e-06
FIN	1995	9	OC	6.95066e-06
FIN	2000	9	OC	0.29001
FIN	2005	9	OC	0.355887
FIN	2010	9	OC	0.148007
FIN	2012	9	OC	0.00290092
FIN	2014	9	OC	0.0980671
FIN	1990	10	OC	78.8107
FIN	1995	10	OC	70.6353
FIN	2000	10	OC	90.6536
FIN	2005	10	OC	81.0776
FIN	2010	10	OC	63.2478
FIN	2012	10	OC	67.9853
FIN	2014	10	OC	76.4172
FIN	1990	7	OC	1496.37
FIN	1995	7	OC	1179
FIN	2000	7	OC	840.546
FIN	2005	7	OC	569.216
FIN	2010	7	OC	335.552
FIN	2012	7	OC	273.346
FIN	2014	7	OC	227.882
FIN	1990	7	OC	205.312
FIN	1995	7	OC	202.861
FIN	2000	7	OC	224.428
FIN	2005	7	OC	248.475
FIN	2010	7	OC	259.006
FIN	2012	7	OC	261.057
FIN	2014	7	OC	239.978
FIN	1990	1	PM10	17614.9
FIN	1995	1	PM10	5044.24
FIN	2000	1	PM10	10005.7
FIN	2005	1	PM10	4519.97
FIN	2010	1	PM10	4184.64
FIN	2012	1	PM10	3948.97
FIN	2014	1	PM10	3500.13
FIN	1990	2	PM10	7085.35
FIN	1995	2	PM10	7238.01
FIN	2000	2	PM10	7390.66
FIN	2005	2	PM10	8687.11
FIN	2010	2	PM10	11482.6
FIN	2012	2	PM10	11377.4
FIN	2014	2	PM10	10448.2
FIN	1990	3	PM10	9730.79
FIN	1995	3	PM10	6904
FIN	2000	3	PM10	4135.31
FIN	2005	3	PM10	6748.47
FIN	2010	3	PM10	2152.32
FIN	2012	3	PM10	2152.32
FIN	2014	3	PM10	2168.62
FIN	1990	4	PM10	14822
FIN	1995	4	PM10	4125
FIN	2000	4	PM10	1907.19
FIN	2005	4	PM10	2139.52
FIN	2010	4	PM10	2662.97
FIN	2012	4	PM10	2662.97
FIN	2014	4	PM10	2662.97
FIN	1990	5	PM10	1544.47
FIN	1995	5	PM10	2166.81
FIN	2000	5	PM10	1094.29
FIN	2005	5	PM10	2342.69
FIN	2010	5	PM10	1991.88
FIN	2012	5	PM10	1154.08
FIN	2014	5	PM10	1734.68
FIN	1990	6	PM10	401.917
FIN	1995	6	PM10	359.461
FIN	2000	6	PM10	700
FIN	2005	6	PM10	231.468
FIN	2010	6	PM10	363
FIN	2012	6	PM10	422.179
FIN	2014	6	PM10	454.58
FIN	1990	8	PM10	4003.9
FIN	1995	8	PM10	3842.37
FIN	2000	8	PM10	3773.82
FIN	2005	8	PM10	2595.04
FIN	2010	8	PM10	1685.88
FIN	2012	8	PM10	1546.62
FIN	2014	8	PM10	1313.82
FIN	1990	9	PM10	0.000184243
FIN	1995	9	PM10	0.000239678
FIN	2000	9	PM10	12.0003
FIN	2005	9	PM10	16.0275
FIN	2010	9	PM10	7.46205
FIN	2012	9	PM10	0.431656
FIN	2014	9	PM10	3.9775
FIN	1990	10	PM10	1213.59
FIN	1995	10	PM10	1243.6
FIN	2000	10	PM10	2023.87
FIN	2005	10	PM10	1853.31
FIN	2010	10	PM10	1605.05
FIN	2012	10	PM10	1737.35
FIN	2014	10	PM10	1932.39
FIN	1990	7	PM10	7765.37
FIN	1995	7	PM10	6118.42
FIN	2000	7	PM10	4362
FIN	2005	7	PM10	2953.94
FIN	2010	7	PM10	1741.34
FIN	2012	7	PM10	1418.52
FIN	2014	7	PM10	1182.59
FIN	1990	7	PM10	6647.93
FIN	1995	7	PM10	6567.94
FIN	2000	7	PM10	7267.56
FIN	2005	7	PM10	8046.02
FIN	2010	7	PM10	8386.92
FIN	2012	7	PM10	8453.04
FIN	2014	7	PM10	7769.7
FIN	1990	1	PM2.5	11314.5
FIN	1995	1	PM2.5	2836.93
FIN	2000	1	PM2.5	3183.89
FIN	2005	1	PM2.5	1849.14
FIN	2010	1	PM2.5	1031.08
FIN	2012	1	PM2.5	1435.84
FIN	2014	1	PM2.5	1213.13
FIN	1990	2	PM2.5	6863.94
FIN	1995	2	PM2.5	7011.82
FIN	2000	2	PM2.5	7159.7
FIN	2005	2	PM2.5	8415.64
FIN	2010	2	PM2.5	11123.8
FIN	2012	2	PM2.5	11021.9
FIN	2014	2	PM2.5	10121.7
FIN	1990	3	PM2.5	6989.79
FIN	1995	3	PM2.5	5693
FIN	2000	3	PM2.5	3191.99
FIN	2005	3	PM2.5	3806.29
FIN	2010	3	PM2.5	1714.44
FIN	2012	3	PM2.5	1714.44
FIN	2014	3	PM2.5	1722.4
FIN	1990	4	PM2.5	11027
FIN	1995	4	PM2.5	2492
FIN	2000	4	PM2.5	1398.36
FIN	2005	4	PM2.5	1586.72
FIN	2010	4	PM2.5	1509.14
FIN	2012	4	PM2.5	1509.14
FIN	2014	4	PM2.5	1509.14
FIN	1990	5	PM2.5	1084.6
FIN	1995	5	PM2.5	1521.64
FIN	2000	5	PM2.5	768.465
FIN	2005	5	PM2.5	1645.15
FIN	2010	5	PM2.5	1398.75
FIN	2012	5	PM2.5	810.435
FIN	2014	5	PM2.5	1218.17
FIN	1990	6	PM2.5	401.917
FIN	1995	6	PM2.5	359.461
FIN	2000	6	PM2.5	75
FIN	2005	6	PM2.5	149.516
FIN	2010	6	PM2.5	361
FIN	2012	6	PM2.5	412.086
FIN	2014	6	PM2.5	442.837
FIN	1990	8	PM2.5	3702.37
FIN	1995	8	PM2.5	3552.65
FIN	2000	8	PM2.5	3490.65
FIN	2005	8	PM2.5	2401.79
FIN	2010	8	PM2.5	1564.38
FIN	2012	8	PM2.5	1430.84
FIN	2014	8	PM2.5	1215.05
FIN	1990	9	PM2.5	0.000184243
FIN	1995	9	PM2.5	0.000239678
FIN	2000	9	PM2.5	10.0003
FIN	2005	9	PM2.5	12.272
FIN	2010	9	PM2.5	5.10368
FIN	2012	9	PM2.5	0.100032
FIN	2014	9	PM2.5	3.38163
FIN	1990	10	PM2.5	562.933
FIN	1995	10	PM2.5	504.537
FIN	2000	10	PM2.5	647.525
FIN	2005	10	PM2.5	579.126
FIN	2010	10	PM2.5	451.77
FIN	2012	10	PM2.5	485.609
FIN	2014	10	PM2.5	545.837
FIN	1990	7	PM2.5	6801.67
FIN	1995	7	PM2.5	5359.11
FIN	2000	7	PM2.5	3820.66
FIN	2005	7	PM2.5	2587.35
FIN	2010	7	PM2.5	1525.24
FIN	2012	7	PM2.5	1242.48
FIN	2014	7	PM2.5	1035.83
FIN	1990	7	PM2.5	1026.56
FIN	1995	7	PM2.5	1014.3
FIN	2000	7	PM2.5	1122.14
FIN	2005	7	PM2.5	1242.38
FIN	2010	7	PM2.5	1295.03
FIN	2012	7	PM2.5	1305.29
FIN	2014	7	PM2.5	1199.89
FIN	1990	1	SOx	128351
FIN	1995	1	SOx	44502
FIN	2000	1	SOx	56839.8
FIN	2005	1	SOx	41227.5
FIN	2010	1	SOx	38078.6
FIN	2012	1	SOx	24211.4
FIN	2014	1	SOx	19635.3
FIN	1990	2	SOx	340.406
FIN	1995	2	SOx	333.398
FIN	2000	2	SOx	326.39
FIN	2005	2	SOx	386.398
FIN	2010	2	SOx	485.23
FIN	2012	2	SOx	480.785
FIN	2014	2	SOx	445.777
FIN	1990	3	SOx	25060.7
FIN	1995	3	SOx	11287
FIN	2000	3	SOx	9220.12
FIN	2005	3	SOx	12558.9
FIN	2010	3	SOx	6112.2
FIN	2012	3	SOx	6112.2
FIN	2014	3	SOx	5967.91
FIN	1990	4	SOx	54085
FIN	1995	4	SOx	19810
FIN	2000	4	SOx	4966.63
FIN	2005	4	SOx	8287.31
FIN	2010	4	SOx	14715
FIN	2012	4	SOx	14715
FIN	2014	4	SOx	14367.6
FIN	1990	5	SOx	0
FIN	1995	5	SOx	0
FIN	2000	5	SOx	0
FIN	2005	5	SOx	0.0463738
FIN	2010	5	SOx	0
FIN	2012	5	SOx	0.0399972
FIN	2014	5	SOx	0
FIN	1990	6	SOx	0
FIN	1995	6	SOx	0
FIN	2000	6	SOx	195
FIN	2005	6	SOx	0
FIN	2010	6	SOx	45.4
FIN	2012	6	SOx	36.28
FIN	2014	6	SOx	14.72
FIN	1990	8	SOx	4597.92
FIN	1995	8	SOx	3575.45
FIN	2000	8	SOx	2610.5
FIN	2005	8	SOx	488.914
FIN	2010	8	SOx	178.576
FIN	2012	8	SOx	116.964
FIN	2014	8	SOx	93.6671
FIN	1990	9	SOx	30
FIN	1995	9	SOx	60
FIN	2000	9	SOx	29
FIN	2005	9	SOx	39.3755
FIN	2010	9	SOx	70.3451
FIN	2012	9	SOx	24.73
FIN	2014	9	SOx	34.4952
FIN	1990	10	SOx	14.5383
FIN	1995	10	SOx	12.1111
FIN	2000	10	SOx	13.7602
FIN	2005	10	SOx	10.864
FIN	2010	10	SOx	7.33412
FIN	2012	10	SOx	8.61862
FIN	2014	10	SOx	10.3977
FIN	1990	7	SOx	5032.28
FIN	1995	7	SOx	1733.22
FIN	2000	7	SOx	211.352
FIN	2005	7	SOx	63.0414
FIN	2010	7	SOx	64.9774
FIN	2012	7	SOx	64.3304
FIN	2014	7	SOx	48.5245
FIN	1990	7	SOx	0
FIN	1995	7	SOx	0
FIN	2000	7	SOx	0
FIN	2005	7	SOx	0
FIN	2010	7	SOx	0
FIN	2012	7	SOx	0
FIN	2014	7	SOx	0
ISL	1990	1	BC	0
ISL	1995	1	BC	0
ISL	2000	1	BC	0
ISL	2005	1	BC	0
ISL	2010	1	BC	0
ISL	2012	1	BC	0
ISL	2014	1	BC	0
ISL	1990	2	BC	0
ISL	1995	2	BC	0
ISL	2000	2	BC	0
ISL	2005	2	BC	0
ISL	2010	2	BC	0
ISL	2012	2	BC	0
ISL	2014	2	BC	0
ISL	1990	3	BC	1.56527
ISL	1995	3	BC	1.78475
ISL	2000	3	BC	3.02917
ISL	2005	3	BC	3.93824
ISL	2010	3	BC	7.59739
ISL	2012	3	BC	8.247
ISL	2014	3	BC	7.3284
ISL	1990	4	BC	0
ISL	1995	4	BC	0
ISL	2000	4	BC	0
ISL	2005	4	BC	0
ISL	2010	4	BC	0
ISL	2012	4	BC	0
ISL	2014	4	BC	0
ISL	1990	5	BC	0
ISL	1995	5	BC	0
ISL	2000	5	BC	0
ISL	2005	5	BC	0
ISL	2010	5	BC	0
ISL	2012	5	BC	0
ISL	2014	5	BC	0
ISL	1990	6	BC	0
ISL	1995	6	BC	0
ISL	2000	6	BC	0
ISL	2005	6	BC	0
ISL	2010	6	BC	0
ISL	2012	6	BC	0
ISL	2014	6	BC	0
ISL	1990	8	BC	0
ISL	1995	8	BC	0
ISL	2000	8	BC	0
ISL	2005	8	BC	0
ISL	2010	8	BC	0
ISL	2012	8	BC	0
ISL	2014	8	BC	0
ISL	1990	9	BC	0
ISL	1995	9	BC	0
ISL	2000	9	BC	0
ISL	2005	9	BC	0
ISL	2010	9	BC	0
ISL	2012	9	BC	0
ISL	2014	9	BC	0
ISL	1990	10	BC	0
ISL	1995	10	BC	0
ISL	2000	10	BC	0
ISL	2005	10	BC	0
ISL	2010	10	BC	0
ISL	2012	10	BC	0
ISL	2014	10	BC	0
ISL	1990	7	BC	0
ISL	1995	7	BC	0
ISL	2000	7	BC	0
ISL	2005	7	BC	0
ISL	2010	7	BC	0
ISL	2012	7	BC	0
ISL	2014	7	BC	0
ISL	1990	7	BC	0
ISL	1995	7	BC	0
ISL	2000	7	BC	0
ISL	2005	7	BC	0
ISL	2010	7	BC	0
ISL	2012	7	BC	0
ISL	2014	7	BC	0
ISL	1990	1	CO	0
ISL	1995	1	CO	0
ISL	2000	1	CO	0
ISL	2005	1	CO	0
ISL	2010	1	CO	0
ISL	2012	1	CO	0
ISL	2014	1	CO	0
ISL	1990	2	CO	0
ISL	1995	2	CO	0
ISL	2000	2	CO	0
ISL	2005	2	CO	0
ISL	2010	2	CO	0
ISL	2012	2	CO	0
ISL	2014	2	CO	0
ISL	1990	3	CO	10642.4
ISL	1995	3	CO	12139.4
ISL	2000	3	CO	27339.5
ISL	2005	3	CO	32878.3
ISL	2010	3	CO	98428.7
ISL	2012	3	CO	98714.3
ISL	2014	3	CO	100908
ISL	1990	4	CO	0
ISL	1995	4	CO	0
ISL	2000	4	CO	0
ISL	2005	4	CO	0
ISL	2010	4	CO	0
ISL	2012	4	CO	0
ISL	2014	4	CO	0
ISL	1990	5	CO	0
ISL	1995	5	CO	0
ISL	2000	5	CO	0
ISL	2005	5	CO	0
ISL	2010	5	CO	0
ISL	2012	5	CO	0
ISL	2014	5	CO	0
ISL	1990	6	CO	0
ISL	1995	6	CO	0
ISL	2000	6	CO	0
ISL	2005	6	CO	0
ISL	2010	6	CO	0
ISL	2012	6	CO	0
ISL	2014	6	CO	0
ISL	1990	8	CO	0
ISL	1995	8	CO	0
ISL	2000	8	CO	0
ISL	2005	8	CO	0
ISL	2010	8	CO	0
ISL	2012	8	CO	0
ISL	2014	8	CO	0
ISL	1990	9	CO	0
ISL	1995	9	CO	0
ISL	2000	9	CO	0
ISL	2005	9	CO	0
ISL	2010	9	CO	0
ISL	2012	9	CO	0
ISL	2014	9	CO	0
ISL	1990	10	CO	0
ISL	1995	10	CO	0
ISL	2000	10	CO	0
ISL	2005	10	CO	0
ISL	2010	10	CO	0
ISL	2012	10	CO	0
ISL	2014	10	CO	0
ISL	1990	7	CO	42265.3
ISL	1995	7	CO	35415.9
ISL	2000	7	CO	17948
ISL	2005	7	CO	15083.6
ISL	2010	7	CO	14853.5
ISL	2012	7	CO	14017.9
ISL	2014	7	CO	13138.4
ISL	1990	7	CO	0
ISL	1995	7	CO	0
ISL	2000	7	CO	0
ISL	2005	7	CO	0
ISL	2010	7	CO	0
ISL	2012	7	CO	0
ISL	2014	7	CO	0
ISL	1990	1	NH3	0
ISL	1995	1	NH3	0
ISL	2000	1	NH3	0
ISL	2005	1	NH3	0
ISL	2010	1	NH3	0
ISL	2012	1	NH3	0
ISL	2014	1	NH3	0
ISL	1990	2	NH3	0
ISL	1995	2	NH3	0
ISL	2000	2	NH3	0
ISL	2005	2	NH3	0
ISL	2010	2	NH3	0
ISL	2012	2	NH3	0
ISL	2014	2	NH3	0
ISL	1990	3	NH3	0
ISL	1995	3	NH3	0
ISL	2000	3	NH3	0
ISL	2005	3	NH3	0
ISL	2010	3	NH3	0
ISL	2012	3	NH3	0
ISL	2014	3	NH3	0
ISL	1990	4	NH3	0
ISL	1995	4	NH3	0
ISL	2000	4	NH3	0
ISL	2005	4	NH3	0
ISL	2010	4	NH3	0
ISL	2012	4	NH3	0
ISL	2014	4	NH3	0
ISL	1990	5	NH3	0
ISL	1995	5	NH3	0
ISL	2000	5	NH3	0
ISL	2005	5	NH3	0
ISL	2010	5	NH3	0
ISL	2012	5	NH3	0
ISL	2014	5	NH3	0
ISL	1990	6	NH3	0
ISL	1995	6	NH3	0
ISL	2000	6	NH3	0
ISL	2005	6	NH3	0
ISL	2010	6	NH3	0
ISL	2012	6	NH3	0
ISL	2014	6	NH3	0
ISL	1990	8	NH3	0
ISL	1995	8	NH3	0
ISL	2000	8	NH3	0
ISL	2005	8	NH3	0
ISL	2010	8	NH3	0
ISL	2012	8	NH3	0
ISL	2014	8	NH3	0
ISL	1990	9	NH3	0
ISL	1995	9	NH3	0
ISL	2000	9	NH3	0
ISL	2005	9	NH3	0
ISL	2010	9	NH3	0
ISL	2012	9	NH3	0
ISL	2014	9	NH3	0
ISL	1990	10	NH3	0
ISL	1995	10	NH3	0
ISL	2000	10	NH3	0
ISL	2005	10	NH3	0
ISL	2010	10	NH3	0
ISL	2012	10	NH3	0
ISL	2014	10	NH3	0
ISL	1990	7	NH3	0
ISL	1995	7	NH3	0
ISL	2000	7	NH3	0
ISL	2005	7	NH3	0
ISL	2010	7	NH3	0
ISL	2012	7	NH3	0
ISL	2014	7	NH3	0
ISL	1990	7	NH3	0
ISL	1995	7	NH3	0
ISL	2000	7	NH3	0
ISL	2005	7	NH3	0
ISL	2010	7	NH3	0
ISL	2012	7	NH3	0
ISL	2014	7	NH3	0
ISL	1990	1	NMVOC	0
ISL	1995	1	NMVOC	0
ISL	2000	1	NMVOC	0
ISL	2005	1	NMVOC	0
ISL	2010	1	NMVOC	0
ISL	2012	1	NMVOC	0
ISL	2014	1	NMVOC	0
ISL	1990	2	NMVOC	0
ISL	1995	2	NMVOC	0
ISL	2000	2	NMVOC	0
ISL	2005	2	NMVOC	0
ISL	2010	2	NMVOC	0
ISL	2012	2	NMVOC	0
ISL	2014	2	NMVOC	0
ISL	1990	3	NMVOC	53.2824
ISL	1995	3	NMVOC	53.1797
ISL	2000	3	NMVOC	81.2351
ISL	2005	3	NMVOC	86.5474
ISL	2010	3	NMVOC	79.87
ISL	2012	3	NMVOC	97.1243
ISL	2014	3	NMVOC	94.0632
ISL	1990	4	NMVOC	0
ISL	1995	4	NMVOC	0
ISL	2000	4	NMVOC	0
ISL	2005	4	NMVOC	0
ISL	2010	4	NMVOC	0
ISL	2012	4	NMVOC	0
ISL	2014	4	NMVOC	0
ISL	1990	5	NMVOC	0
ISL	1995	5	NMVOC	0
ISL	2000	5	NMVOC	0
ISL	2005	5	NMVOC	0
ISL	2010	5	NMVOC	0
ISL	2012	5	NMVOC	0
ISL	2014	5	NMVOC	0
ISL	1990	6	NMVOC	0
ISL	1995	6	NMVOC	0
ISL	2000	6	NMVOC	0
ISL	2005	6	NMVOC	0
ISL	2010	6	NMVOC	0
ISL	2012	6	NMVOC	0
ISL	2014	6	NMVOC	0
ISL	1990	8	NMVOC	0
ISL	1995	8	NMVOC	0
ISL	2000	8	NMVOC	0
ISL	2005	8	NMVOC	0
ISL	2010	8	NMVOC	0
ISL	2012	8	NMVOC	0
ISL	2014	8	NMVOC	0
ISL	1990	9	NMVOC	0
ISL	1995	9	NMVOC	0
ISL	2000	9	NMVOC	0
ISL	2005	9	NMVOC	0
ISL	2010	9	NMVOC	0
ISL	2012	9	NMVOC	0
ISL	2014	9	NMVOC	0
ISL	1990	10	NMVOC	0
ISL	1995	10	NMVOC	0
ISL	2000	10	NMVOC	0
ISL	2005	10	NMVOC	0
ISL	2010	10	NMVOC	0
ISL	2012	10	NMVOC	0
ISL	2014	10	NMVOC	0
ISL	1990	7	NMVOC	9192.3
ISL	1995	7	NMVOC	7817.24
ISL	2000	7	NMVOC	3604.69
ISL	2005	7	NMVOC	2780.27
ISL	2010	7	NMVOC	2973.02
ISL	2012	7	NMVOC	2833.08
ISL	2014	7	NMVOC	2428.37
ISL	1990	7	NMVOC	0
ISL	1995	7	NMVOC	0
ISL	2000	7	NMVOC	0
ISL	2005	7	NMVOC	0
ISL	2010	7	NMVOC	0
ISL	2012	7	NMVOC	0
ISL	2014	7	NMVOC	0
ISL	1990	1	NOx	0
ISL	1995	1	NOx	0
ISL	2000	1	NOx	0
ISL	2005	1	NOx	0
ISL	2010	1	NOx	0
ISL	2012	1	NOx	0
ISL	2014	1	NOx	0
ISL	1990	2	NOx	0
ISL	1995	2	NOx	0
ISL	2000	2	NOx	0
ISL	2005	2	NOx	0
ISL	2010	2	NOx	0
ISL	2012	2	NOx	0
ISL	2014	2	NOx	0
ISL	1990	3	NOx	718.224
ISL	1995	3	NOx	819.47
ISL	2000	3	NOx	1280.62
ISL	2005	3	NOx	1413
ISL	2010	3	NOx	1902.45
ISL	2012	3	NOx	2041.16
ISL	2014	3	NOx	1990
ISL	1990	4	NOx	0
ISL	1995	4	NOx	0
ISL	2000	4	NOx	0
ISL	2005	4	NOx	0
ISL	2010	4	NOx	0
ISL	2012	4	NOx	0
ISL	2014	4	NOx	0
ISL	1990	5	NOx	0
ISL	1995	5	NOx	0
ISL	2000	5	NOx	0
ISL	2005	5	NOx	0
ISL	2010	5	NOx	0
ISL	2012	5	NOx	0
ISL	2014	5	NOx	0
ISL	1990	6	NOx	0
ISL	1995	6	NOx	0
ISL	2000	6	NOx	0
ISL	2005	6	NOx	0
ISL	2010	6	NOx	0
ISL	2012	6	NOx	0
ISL	2014	6	NOx	0
ISL	1990	8	NOx	0
ISL	1995	8	NOx	0
ISL	2000	8	NOx	0
ISL	2005	8	NOx	0
ISL	2010	8	NOx	0
ISL	2012	8	NOx	0
ISL	2014	8	NOx	0
ISL	1990	9	NOx	0
ISL	1995	9	NOx	0
ISL	2000	9	NOx	0
ISL	2005	9	NOx	0
ISL	2010	9	NOx	0
ISL	2012	9	NOx	0
ISL	2014	9	NOx	0
ISL	1990	10	NOx	0
ISL	1995	10	NOx	0
ISL	2000	10	NOx	0
ISL	2005	10	NOx	0
ISL	2010	10	NOx	0
ISL	2012	10	NOx	0
ISL	2014	10	NOx	0
ISL	1990	7	NOx	5777.34
ISL	1995	7	NOx	5192.75
ISL	2000	7	NOx	3554.58
ISL	2005	7	NOx	4119.81
ISL	2010	7	NOx	4613.14
ISL	2012	7	NOx	4550.77
ISL	2014	7	NOx	4186.67
ISL	1990	7	NOx	0
ISL	1995	7	NOx	0
ISL	2000	7	NOx	0
ISL	2005	7	NOx	0
ISL	2010	7	NOx	0
ISL	2012	7	NOx	0
ISL	2014	7	NOx	0
ISL	1990	1	OC	0
ISL	1995	1	OC	0
ISL	2000	1	OC	0
ISL	2005	1	OC	0
ISL	2010	1	OC	0
ISL	2012	1	OC	0
ISL	2014	1	OC	0
ISL	1990	2	OC	0
ISL	1995	2	OC	0
ISL	2000	2	OC	0
ISL	2005	2	OC	0
ISL	2010	2	OC	0
ISL	2012	2	OC	0
ISL	2014	2	OC	0
ISL	1990	3	OC	0
ISL	1995	3	OC	0
ISL	2000	3	OC	0
ISL	2005	3	OC	0
ISL	2010	3	OC	0
ISL	2012	3	OC	0
ISL	2014	3	OC	0
ISL	1990	4	OC	0
ISL	1995	4	OC	0
ISL	2000	4	OC	0
ISL	2005	4	OC	0
ISL	2010	4	OC	0
ISL	2012	4	OC	0
ISL	2014	4	OC	0
ISL	1990	5	OC	0
ISL	1995	5	OC	0
ISL	2000	5	OC	0
ISL	2005	5	OC	0
ISL	2010	5	OC	0
ISL	2012	5	OC	0
ISL	2014	5	OC	0
ISL	1990	6	OC	0
ISL	1995	6	OC	0
ISL	2000	6	OC	0
ISL	2005	6	OC	0
ISL	2010	6	OC	0
ISL	2012	6	OC	0
ISL	2014	6	OC	0
ISL	1990	8	OC	0
ISL	1995	8	OC	0
ISL	2000	8	OC	0
ISL	2005	8	OC	0
ISL	2010	8	OC	0
ISL	2012	8	OC	0
ISL	2014	8	OC	0
ISL	1990	9	OC	0
ISL	1995	9	OC	0
ISL	2000	9	OC	0
ISL	2005	9	OC	0
ISL	2010	9	OC	0
ISL	2012	9	OC	0
ISL	2014	9	OC	0
ISL	1990	10	OC	0
ISL	1995	10	OC	0
ISL	2000	10	OC	0
ISL	2005	10	OC	0
ISL	2010	10	OC	0
ISL	2012	10	OC	0
ISL	2014	10	OC	0
ISL	1990	7	OC	0
ISL	1995	7	OC	0
ISL	2000	7	OC	0
ISL	2005	7	OC	0
ISL	2010	7	OC	0
ISL	2012	7	OC	0
ISL	2014	7	OC	0
ISL	1990	7	OC	0
ISL	1995	7	OC	0
ISL	2000	7	OC	0
ISL	2005	7	OC	0
ISL	2010	7	OC	0
ISL	2012	7	OC	0
ISL	2014	7	OC	0
ISL	1990	1	PM10	0
ISL	1995	1	PM10	0
ISL	2000	1	PM10	0
ISL	2005	1	PM10	0
ISL	2010	1	PM10	0
ISL	2012	1	PM10	0
ISL	2014	1	PM10	0
ISL	1990	2	PM10	0
ISL	1995	2	PM10	0
ISL	2000	2	PM10	0
ISL	2005	2	PM10	0
ISL	2010	2	PM10	0
ISL	2012	2	PM10	0
ISL	2014	2	PM10	0
ISL	1990	3	PM10	168.158
ISL	1995	3	PM10	191.49
ISL	2000	3	PM10	302.876
ISL	2005	3	PM10	339.104
ISL	2010	3	PM10	518.459
ISL	2012	3	PM10	692.204
ISL	2014	3	PM10	622.273
ISL	1990	4	PM10	0
ISL	1995	4	PM10	0
ISL	2000	4	PM10	0
ISL	2005	4	PM10	0
ISL	2010	4	PM10	0
ISL	2012	4	PM10	0
ISL	2014	4	PM10	0
ISL	1990	5	PM10	0
ISL	1995	5	PM10	0
ISL	2000	5	PM10	0
ISL	2005	5	PM10	0
ISL	2010	5	PM10	0
ISL	2012	5	PM10	0
ISL	2014	5	PM10	0
ISL	1990	6	PM10	0
ISL	1995	6	PM10	0
ISL	2000	6	PM10	0
ISL	2005	6	PM10	0
ISL	2010	6	PM10	0
ISL	2012	6	PM10	0
ISL	2014	6	PM10	0
ISL	1990	8	PM10	0
ISL	1995	8	PM10	0
ISL	2000	8	PM10	0
ISL	2005	8	PM10	0
ISL	2010	8	PM10	0
ISL	2012	8	PM10	0
ISL	2014	8	PM10	0
ISL	1990	9	PM10	0
ISL	1995	9	PM10	0
ISL	2000	9	PM10	0
ISL	2005	9	PM10	0
ISL	2010	9	PM10	0
ISL	2012	9	PM10	0
ISL	2014	9	PM10	0
ISL	1990	10	PM10	0
ISL	1995	10	PM10	0
ISL	2000	10	PM10	0
ISL	2005	10	PM10	0
ISL	2010	10	PM10	0
ISL	2012	10	PM10	0
ISL	2014	10	PM10	0
ISL	1990	7	PM10	140
ISL	1995	7	PM10	140
ISL	2000	7	PM10	139.943
ISL	2005	7	PM10	176.158
ISL	2010	7	PM10	164.351
ISL	2012	7	PM10	178.956
ISL	2014	7	PM10	149.491
ISL	1990	7	PM10	290
ISL	1995	7	PM10	290
ISL	2000	7	PM10	290
ISL	2005	7	PM10	290
ISL	2010	7	PM10	460
ISL	2012	7	PM10	457.186
ISL	2014	7	PM10	460
ISL	1990	1	PM2.5	0
ISL	1995	1	PM2.5	0
ISL	2000	1	PM2.5	0
ISL	2005	1	PM2.5	0
ISL	2010	1	PM2.5	0
ISL	2012	1	PM2.5	0
ISL	2014	1	PM2.5	0
ISL	1990	2	PM2.5	0
ISL	1995	2	PM2.5	0
ISL	2000	2	PM2.5	0
ISL	2005	2	PM2.5	0
ISL	2010	2	PM2.5	0
ISL	2012	2	PM2.5	0
ISL	2014	2	PM2.5	0
ISL	1990	3	PM2.5	153.518
ISL	1995	3	PM2.5	174.791
ISL	2000	3	PM2.5	273.9
ISL	2005	3	PM2.5	299.87
ISL	2010	3	PM2.5	438.894
ISL	2012	3	PM2.5	609.534
ISL	2014	3	PM2.5	549.016
ISL	1990	4	PM2.5	0
ISL	1995	4	PM2.5	0
ISL	2000	4	PM2.5	0
ISL	2005	4	PM2.5	0
ISL	2010	4	PM2.5	0
ISL	2012	4	PM2.5	0
ISL	2014	4	PM2.5	0
ISL	1990	5	PM2.5	0
ISL	1995	5	PM2.5	0
ISL	2000	5	PM2.5	0
ISL	2005	5	PM2.5	0
ISL	2010	5	PM2.5	0
ISL	2012	5	PM2.5	0
ISL	2014	5	PM2.5	0
ISL	1990	6	PM2.5	0
ISL	1995	6	PM2.5	0
ISL	2000	6	PM2.5	0
ISL	2005	6	PM2.5	0
ISL	2010	6	PM2.5	0
ISL	2012	6	PM2.5	0
ISL	2014	6	PM2.5	0
ISL	1990	8	PM2.5	0
ISL	1995	8	PM2.5	0
ISL	2000	8	PM2.5	0
ISL	2005	8	PM2.5	0
ISL	2010	8	PM2.5	0
ISL	2012	8	PM2.5	0
ISL	2014	8	PM2.5	0
ISL	1990	9	PM2.5	0
ISL	1995	9	PM2.5	0
ISL	2000	9	PM2.5	0
ISL	2005	9	PM2.5	0
ISL	2010	9	PM2.5	0
ISL	2012	9	PM2.5	0
ISL	2014	9	PM2.5	0
ISL	1990	10	PM2.5	0
ISL	1995	10	PM2.5	0
ISL	2000	10	PM2.5	0
ISL	2005	10	PM2.5	0
ISL	2010	10	PM2.5	0
ISL	2012	10	PM2.5	0
ISL	2014	10	PM2.5	0
ISL	1990	7	PM2.5	121
ISL	1995	7	PM2.5	121
ISL	2000	7	PM2.5	120.902
ISL	2005	7	PM2.5	151.695
ISL	2010	7	PM2.5	138.475
ISL	2012	7	PM2.5	153.547
ISL	2014	7	PM2.5	125.276
ISL	1990	7	PM2.5	60
ISL	1995	7	PM2.5	60
ISL	2000	7	PM2.5	60
ISL	2005	7	PM2.5	60
[truncated: 1,529 more rows]

## Sheet: Table S2, Nordic Emissions
Emissions [ton/year]
	PM10	PM2.5	BC	OC	SOx	NOx	CO	NH3	NMVOC
Denmark	243133	162970	41943.6	41895.4	395462	1.28181e+06	3.06871e+06	650007	1.0197e+06
1990	37178	25372.5	7786.65	6521	170748	280975	706659	125928	188309
1	954.055	789.495	36.8984	39.1123	126849	94454.7	8121.8	0.2871	425.528
2	12790.5	12441.6	2153.37	3608.06	11101.6	7664.99	134423	1200.23	14964
3	806.208	495.156	79.5341	26.5579	15163	13822	16222.3	768.702	2031.72
4	2708.32	811.142	8.23025	42.2116	7344.48	914.79	306.133	67.0487	7927.05
5	615.427	61.6521	1025.53	36.9913	0.0376218	3.5596	5.35387	0	7903.84
6	257.445	237.154	4.04428	47.4308	30.0022	45.1439	2288.02	55.1571	38493.6
7	5139.63	4620.55	2180.98	1004.05	5769.25	111405	462671	71.3303	64081.1
8	4195.5	4195.5	2281.08	1510.38	2784.78	27199.3	79311.7	5.5129	10297.1
9	312.204	312.013	0.9078	9.04837	1690.52	228.893	1164.12	207.115	2170.85
10	9398.74	1408.24	16.0816	197.154	16.0816	25236.9	2145.29	123553	40014.5
1995	37744.6	25908.7	7836.92	6569.31	139870	270071	631098	107718	188978
1	1157.69	964.615	45.049	36.4788	110382	88466.6	10838.1	3.05876	2894.75
2	13600.5	13246.6	2134.19	3841.52	5528.27	8066.27	121806	1245.06	15438.9
3	769.442	463.869	65.8205	22.3187	11576.3	15607.1	15990.3	724.537	1693.98
4	2791.82	809.594	7.59208	44.2716	7162.99	742.182	379.518	131.558	9094.05
5	780.525	78.0525	1300.87	46.8315	2.01289e-05	0.0019045	0.0028645	0	6098.89
6	304.024	256.465	4.28798	51.2931	35.0016	45.1902	2388.13	49.3936	45718.4
7	5437.54	4841.14	2324.98	1050.7	1684.34	106426	412056	1062.98	59458.9
8	3544.35	3544.35	1933.84	1275.97	2422.58	28970.7	63715.8	5.89011	8531.61
9	348.159	347.946	1.23597	10.0904	1059.2	291.911	1383.41	273.961	1716.01
10	9010.53	1356	19.0506	189.841	19.0506	21455.3	2541.35	104221	38333
2000	35136	22886.1	5964.76	5693.37	28999.1	205787	456798	97043.1	167065
1	962.068	818.724	44.5802	29.815	12585.2	50659.6	11046.2	8.65145	3579.23
2	12694.6	12382.7	1937.51	3587.82	3067.22	7291.8	87417.8	1214.65	13993.5
3	824.751	484.479	67.4904	21.8665	6949.45	16452.7	18218.1	685.009	1324.24
4	3519.82	898.04	7.95591	51.4789	4653.29	533.603	354.233	72.1168	7787.17
5	384.906	38.4928	641.507	23.0957	0.000741741	0.0701801	0.105555	0	12530.3
6	393.468	316.451	6.74931	63.2903	55.4033	61.226	3590.12	48.6184	41674.8
7	4382.3	3733.5	1848.49	805.7	354.723	84767	279111	2514.99	40272.7
8	2529.21	2529.21	1384.86	910.516	502.913	26938.9	52261.2	5.19658	7217.67
9	324.974	324.716	1.95458	9.41676	807.293	405.661	1643.64	540.962	1555.92
10	9119.88	1359.8	23.6567	190.372	23.6567	18676.2	3155.8	91952.9	37129.6
2005	36391.3	24756.7	5954.81	6432.59	22234.4	183208	408848	88525.6	141514
1	782.629	644.393	35.9749	26.1193	7925.72	46010.6	9392.62	10.2767	2641.65
2	16545	16145.4	2398.89	4680.96	2951.36	7182.54	110254	1644.69	16852.9
3	558.039	329.162	41.0994	15.3845	6022.76	13489.4	16189	617.098	1002.76
4	3295.3	538.724	1.79789	41.6801	3935.48	68.95	467.174	128.87	6942.13
5	361.941	36.2211	603.19	21.7326	0.00929433	0.879387	1.32265	0	12584.7
6	367.174	308.734	7.40454	61.7468	57.6178	63.8569	4029.07	44.8806	31866.9
7	3916.84	3205.76	1702.29	688.02	77.6917	72770	203925	2423.01	25574.9
8	1977.94	1977.94	1136.22	712.06	211.969	25952.9	59512.3	6.37728	6853.54
9	315.321	314.996	1.47997	9.13487	1025.31	341.865	1549.41	529.533	750.387
10	8271.19	1255.34	26.45	175.748	26.45	17326.9	3528.43	83120.9	36444.2
2010	35511.8	24400.5	5499.12	6414.51	13502	130502	339447	79636.4	120242
1	695.833	571.55	36.5093	25.9927	3852.33	27329.9	11810.8	10.8028	2435.61
2	17768.3	17386.8	2728.6	5042.11	2419.48	6993.68	114334	1959.23	17700
3	402.502	257.078	53.1223	12.614	3530.23	6335.29	4026.13	547.637	1220.26
4	2649.56	432.675	1.48095	33.5168	2527.72	16.75	361.526	158.417	8344.53
5	274.222	27.4222	457.037	16.4533	0	0	0	0	5291.87
6	395.229	309.207	4.12846	61.8413	38.6187	41.6796	2531.81	40.2623	27304.6
7	3191.43	2480.59	1324.58	528.401	76.9696	52795.7	131296	1789.14	14704
8	1428.19	1428.19	874.232	514.148	180.261	19901.9	71280.1	6.89315	5616.9
9	284.716	284.235	0.976313	8.2428	857.996	255.429	1345.88	608.421	659.836
10	8421.74	1222.77	18.4457	171.189	18.4457	16831.8	2460.65	74515.6	36964.7
2012	31672.3	20855.3	4699.39	5425.46	11023.8	111726	281223	76642	110644
1	617.623	506.653	30.4197	23.9875	3046.85	21023.7	11134.2	14.8122	1484.11
2	14894.5	14579.6	2385.02	4228.08	2175.02	5833.19	93125.5	1701.35	14649.2
3	405.803	262.209	50.8178	11.4001	2502.01	5105.47	3892.85	556.483	952.235
4	2667.46	435.512	1.29519	34.5247	2310.24	19.47	388.945	47.5525	8331.65
5	238.671	23.8671	397.786	14.3203	0	0	0	0	4632.33
6	324.808	269.537	6.97702	53.9073	54.3241	58.4756	3720.75	37.3143	26938.3
7	2803.03	2098.26	1057.95	444.395	71.5733	45358.4	99140.2	1461.72	10684.7
8	1207.56	1207.56	747.52	434.723	130.053	17386	65853	6.74692	4934.49
9	234.125	233.851	0.631839	6.78168	712.765	193.551	1168.1	563.584	689.743
10	8278.69	1238.16	20.9817	173.342	20.9817	16748.2	2798.95	72252.5	37346.9
2014	29499.4	18790.7	4201.99	4839.19	9084.32	99536.9	244638	74513.4	102949
1	650.185	525.759	29.0099	24.7661	2463.86	16685	10150.5	14.3601	983.979
2	13342.7	13067.3	2218.33	3789.52	1691.91	5198.52	80496.1	1605.9	12791.1
3	361.58	208.947	21.2538	9.40811	2587.22	4634.37	3530.74	490.3	653.483
4	2511.96	427.479	1.42968	33.6966	1166.76	23.2	412.585	43.2096	8307.91
5	271.975	27.1975	453.291	16.3185	0	0	0	0	3629.71
6	309.084	249.769	5.57204	49.9538	45.2316	47.7687	3052.75	32.2025	25300.1
7	2566.28	1849.24	858.085	389.23	71.7263	40598.5	80304.2	1206.42	8484.2
8	955.657	955.657	591.957	344.036	137.305	15060.5	62513.7	6.51513	4434.65
9	224.094	223.837	0.72981	6.49128	897.984	209.228	1199.44	595.622	682.368
10	8305.85	1255.47	22.3261	175.766	22.3261	17079.9	2978.31	70518.8	37681.1
Finland	301556	192840	44584.2	40075.7	582446	1.29035e+06	3.82081e+06	257175	919674
1990	70830.2	49775.3	9025.52	7211.57	217512	263142	767792	37184.5	230075
1	17614.9	11314.5	25.05	854.057	128351	39471.1	46410	1215.99	28205.5
2	7085.35	6863.94	2211.7	1990.54	340.406	3835.56	146281	0	15071.5
3	9730.79	6989.79	174.745	202.704	25060.7	22216.2	0	0	0
4	14822	11027	275.675	319.783	54085	6219	0	0	0
5	1544.47	1084.6	0	650.761	0	0	0	0	7755
6	401.917	401.917	0	80.3833	0	0	0	256.931	48247.5
7	14413.3	7828.23	4238.7	1701.68	5032.28	134325	468067	255.312	82059.8
8	4003.9	3702.37	2062.49	1332.85	4597.92	56861.6	103330	3.60635	47927.8
9	0.000184243	0.000184243	0	5.34305e-06	30	100	10	309.539	554.811
10	1213.59	562.933	37.1509	78.8107	14.5383	112.924	3694.15	35143.1	252.998
1995	43609.8	30345.4	7764.44	6178.73	81313.2	240336	663133	35347.3	194466
1	5044.24	2836.93	17.325	191.611	44502	39985	39010	944.594	21393.8
2	7238.01	7011.82	2209.78	2033.43	333.398	3756.6	144023	0	14378.1
3	6904	5693	142.325	165.097	11287	20738	0	0	0
4	4125	2492	62.3	72.268	19810	10587	0	0	0
5	2166.81	1521.64	0	912.982	0	0	0	0	7472
6	359.461	359.461	0	71.8922	0	0	0	249.431	35592.8
7	12686.4	6373.41	3340.92	1381.86	1733.22	110167	372611	955.617	66973.2
8	3842.37	3552.65	1960.8	1278.95	3575.45	54808.2	104209	3.61636	47875.6
9	0.000239678	0.000239678	0	6.95066e-06	60	200	200	368.79	569.378
10	1243.6	504.537	30.9812	70.6353	12.1111	94.1376	3079.94	32825.2	211.104
2000	42672.4	24868.4	6975.57	5329.08	74412.6	197082	590789	36831.6	142917
1	10005.7	3183.89	114.59	231.016	56839.8	36117.6	67154.1	1078.97	16508.4
2	7390.66	7159.7	2207.85	2076.31	326.39	3677.63	141766	0	13684.7
3	4135.31	3191.99	79.7998	92.5677	9220.12	21716.6	0	0	0
4	1907.19	1398.36	34.959	40.5525	4966.63	6449.17	0	0	543.503
5	1094.29	768.465	0	461.079	0	0	0	0	3608.3
6	700	75	0.84191	15	195	20	4915.9	198.431	31983.6
7	11629.6	4942.81	2585.86	1064.97	211.352	92963.9	290695	1918.26	51287.1
8	3773.82	3490.65	1919.69	1256.63	2610.5	35863.2	82992.3	4.36798	24585.6
9	12.0003	10.0003	0.000156018	0.29001	29	173	16.6	421.385	509.514
10	2023.87	647.525	31.9718	90.6536	13.7602	100.382	3248.83	33210.2	205.809
2005	40133.6	24275.4	6078.58	5483.95	63062.4	170698	517493	38364.8	115896
1	4519.97	1849.14	251.207	106.256	41227.5	27976.3	71715.4	1005.57	14024.9
2	8687.11	8415.64	2595.3	2440.53	386.398	4353.78	166023	0	15970.9
3	6748.47	3806.29	95.1573	110.382	12558.9	24691.3	0	0	0
4	2139.52	1586.72	39.6681	46.015	8287.31	7739.91	0	0	629.85
5	2342.69	1645.15	0	987.088	0.0463738	17.56	0	0	4054.41
6	231.468	149.516	0.699012	29.9032	0	0	0	238.361	26716.8
7	11000	3829.72	1834.89	817.691	63.0414	74740.2	187334	1995.64	31365
8	2595.04	2401.79	1234.82	864.643	488.914	30861.2	89609.3	4.35678	22438.2
9	16.0275	12.272	0.000193956	0.355887	39.3755	235.535	121.562	466.687	517.042
10	1853.31	579.126	26.8455	81.0776	10.864	82.5184	2689.42	34654.2	179.396
2010	36264.1	21979.7	5287.25	5641.03	59757.6	156518	455162	37138.8	87812.9
1	4184.64	1031.08	43.8246	33.6834	38078.6	49905.9	61782	633.308	8298.2
2	11482.6	11123.8	3145.99	3225.9	485.23	5467.38	208608	0	18646.8
3	2152.32	1714.44	22.1904	59.915	6112.2	19309.9	0	0	0
4	2662.97	1509.14	92.1762	188.951	14715	7435.86	0	0	7336.12
5	1991.88	1398.75	0	839.253	0	0	0	0	3627.62
6	363	361	0.771991	72.2	45.4	0	1	130.711	20445.4
7	10128.3	2820.26	1173.29	594.557	64.9774	49406.2	100835	1613.27	16549.4
8	1685.88	1564.38	791.506	563.176	178.576	24648.8	82254.7	4.10201	12177.6
9	7.46205	5.10368	1.54006	0.148007	70.3451	293	34	480.167	633.587
10	1605.05	451.77	15.9603	63.2478	7.33412	51.3031	1647.77	34277.3	98.3015
2012	34873.9	21368.2	5011.74	5198.11	45770.3	137030	432229	36191	78206
1	3948.97	1435.84	22.5755	66.7262	24211.4	38051	57656.8	532.659	5918.67
2	11377.4	11021.9	3117.17	3196.35	480.785	5417.3	206697	0	18476
3	2152.32	1714.44	22.1904	59.915	6112.2	19309.9	0	0	0
4	2662.97	1509.14	92.1762	188.951	14715	7435.86	0	0	7336.12
5	1154.08	810.435	0	486.261	0.0399972	0.0100053	0	0	3122.57
6	422.179	412.086	0.672013	82.4172	36.28	0.00833811	12.2551	164.781	17876
7	9871.56	2547.77	996.07	534.403	64.3304	43280.6	77807.9	1424.86	13208.8
8	1546.62	1430.84	742.843	515.101	116.964	23115.2	88151.6	4.44005	11550.1
9	0.431656	0.100032	0.00380901	0.00290092	24.73	360.95	21.63	496.942	609.724
10	1737.35	485.609	18.0474	67.9853	8.61862	58.846	1881.39	33567.4	108.049
2014	33171.7	20227.4	4441.12	5033.23	40618.4	125541	394211	36117.1	70301.3
1	3500.13	1213.13	5.507	47.8083	19635.3	34667.5	52387.5	568.605	5219.89
2	10448.2	10121.7	2849.1	2935.3	445.777	5022.84	188743	0	16900.8
3	2168.62	1722.4	18.2498	59.915	5967.91	19500.7	0	0	0
4	2662.97	1509.14	75.8073	188.951	14367.6	7435.86	0	0	7336.12
5	1734.68	1218.17	0	730.899	0	0.799994	0	0	3002.86
6	454.58	442.837	0.620857	88.5673	14.72	0.00682509	9.40878	212.819	16225.6
7	8952.28	2235.71	851.92	467.859	48.5245	38048.8	65367.8	1292.58	11260
8	1313.82	1215.05	616.205	437.416	93.6671	20228	85336.2	4.35754	9700.45
9	3.9775	3.38163	0.0157171	0.0980671	34.4952	563.871	34.1322	491.347	516.714
10	1932.39	545.837	23.6982	76.4172	10.3977	72.639	2332.47	33547.4	138.876
Iceland	6460.65	3942.86	33.4902	0	59177.7	42160	533774	0	32174.3
1990	598.158	334.518	1.56527	0	3297.98	6495.57	52907.7	0	9245.58
1	0	0	0	0	0	0	0	0	0
2	0	0	0	0	0	0	0	0	0
3	168.158	153.518	1.56527	0	3182.92	718.224	10642.4	0	53.2824
4	0	0	0	0	0	0	0	0	0
5	0	0	0	0	0	0	0	0	0
6	0	0	0	0	0	0	0	0	0
7	430	181	0	0	115.065	5777.34	42265.3	0	9192.3
8	0	0	0	0	0	0	0	0	0
9	0	0	0	0	0	0	0	0	0
10	0	0	0	0	0	0	0	0	0
1995	621.49	355.791	1.78475	0	2852.08	6012.22	47555.4	0	7870.42
1	0	0	0	0	0	0	0	0	0
2	0	0	0	0	0	0	0	0	0
3	191.49	174.791	1.78475	0	2731.36	819.47	12139.4	0	53.1797
4	0	0	0	0	0	0	0	0	0
5	0	0	0	0	0	0	0	0	0
6	0	0	0	0	0	0	0	0	0
7	430	181	0	0	120.724	5192.75	35415.9	0	7817.24
8	0	0	0	0	0	0	0	0	0
9	0	0	0	0	0	0	0	0	0
10	0	0	0	0	0	0	0	0	0
2000	732.819	454.802	3.02917	0	5036.68	4835.21	45287.5	0	3685.92
1	0	0	0	0	0	0	0	0	0
2	0	0	0	0	0	0	0	0	0
3	302.876	273.9	3.02917	0	4979.66	1280.62	27339.5	0	81.2351
4	0	0	0	0	0	0	0	0	0
5	0	0	0	0	0	0	0	0	0
6	0	0	0	0	0	0	0	0	0
7	429.943	180.902	0	0	57.0186	3554.58	17948	0	3604.69
8	0	0	0	0	0	0	0	0	0
9	0	0	0	0	0	0	0	0	0
10	0	0	0	0	0	0	0	0	0
2005	805.262	511.566	3.93824	0	6091.74	5532.82	47961.9	0	2866.82
1	0	0	0	0	0	0	0	0	0
2	0	0	0	0	0	0	0	0	0
3	339.104	299.87	3.93824	0	6067.72	1413	32878.3	0	86.5474
4	0	0	0	0	0	0	0	0	0
5	0	0	0	0	0	0	0	0	0
6	0	0	0	0	0	0	0	0	0
7	466.158	211.695	0	0	24.0208	4119.81	15083.6	0	2780.27
8	0	0	0	0	0	0	0	0	0
9	0	0	0	0	0	0	0	0	0
10	0	0	0	0	0	0	0	0	0
2010	1142.81	667.37	7.59739	0	13028.2	6515.59	113282	0	3052.89
1	0	0	0	0	0	0	0	0	0
2	0	0	0	0	0	0	0	0	0
3	518.459	438.894	7.59739	0	13002.7	1902.45	98428.7	0	79.87
4	0	0	0	0	0	0	0	0	0
5	0	0	0	0	0	0	0	0	0
6	0	0	0	0	0	0	0	0	0
7	624.351	228.475	0	0	25.4647	4613.14	14853.5	0	2973.02
8	0	0	0	0	0	0	0	0	0
9	0	0	0	0	0	0	0	0	0
10	0	0	0	0	0	0	0	0	0
2012	1328.35	854.518	8.247	0	13472.5	6591.92	112732	0	2930.2
1	0	0	0	0	0	0	0	0	0
2	0	0	0	0	0	0	0	0	0
3	692.204	609.534	8.247	0	13447.7	2041.16	98714.3	0	97.1243
4	0	0	0	0	0	0	0	0	0
5	0	0	0	0	0	0	0	0	0
6	0	0	0	0	0	0	0	0	0
7	636.142	244.984	0	0	24.7382	4550.77	14017.9	0	2833.08
8	0	0	0	0	0	0	0	0	0
9	0	0	0	0	0	0	0	0	0
10	0	0	0	0	0	0	0	0	0
2014	1231.76	764.292	7.3284	0	15398.6	6176.68	114047	0	2522.43
1	0	0	0	0	0	0	0	0	0
2	0	0	0	0	0	0	0	0	0
3	622.273	549.016	7.3284	0	15374.1	1990	100908	0	94.0632
4	0	0	0	0	0	0	0	0	0
5	0	0	0	0	0	0	0	0	0
6	0	0	0	0	0	0	0	0	0
7	609.491	215.276	0	0	24.4792	4186.67	13138.4	0	2428.37
8	0	0	0	0	0	0	0	0	0
9	0	0	0	0	0	0	0	0	0
10	0	0	0	0	0	0	0	0	0
Norway	282646	238006	16497.6	53942.2	8086.84	570566	2.7752e+06	174906	695786
1990	41458.5	33214.2	2195.73	7354.06	4366.23	95579.5	636524	22640.7	117932
1	0	0	0	0	0	0	0	0	0
2	21129.5	21129.5	1021.25	6127.56	0	0	152409	0	0
3	8400.1	8400.1	0	243.603	0	18074.5	350.704	43.7	0
4	0	0	0	0	0	0	0	0	0
5	0	0	0	0	0	0	0	0	0
6	0	0	0	0	0	0	688.095	0	51882.5
7	10555.4	2361.31	914.477	506.754	3299.99	64712.8	433182	170.757	52307
8	1372.39	1322.21	259.996	475.995	1066.25	12792.1	49894.8	2.54775	13742.8
9	0	0	0	0	0	0	0	0	0
10	1.04152	1.04152	0	0.145813	0	0	0	22423.7	0
1995	45411.8	37825.8	2523.26	7738.82	2246.2	96269.2	579393	24144.9	120634
1	0	0	0	0	0	0	0	0	0
2	22174.4	22174.4	1057.26	6430.59	0	0	158712	0	0
3	11943.4	11943.4	34.142	346.358	0	22144.3	25106.5	474.085	15561.1
4	0	0	0	0	0	0	0	0	0
5	0	0	0	0	0	0	0	0	0
6	0	0	0	0	0	0	422.163	0	49254.7
7	10120.1	2574.44	1071.16	554.012	1740.33	59479.3	345634	791.681	42370
8	1172.95	1132.56	360.696	407.721	505.87	14645.7	49517.7	2.81337	13447.9
9	0	0	0	0	0	0	0	0	0
10	0.987147	0.987147	0	0.138201	0	0	0	22876.3	0
2000	43045.1	37128.3	2498.8	8078.41	907.655	92271.1	466446	25299.5	112781
1	0	0	0	0	0	0	0	0	0
2	23980.4	23980.4	1155.92	6954.3	0	0	167801	0	0
3	9876.95	9876.95	27.359	286.431	0	26589	21946.1	677.513	22762.9
4	0	0	0	0	0	0	0	0	0
5	0	0	0	0	0	0	0	0	0
6	0	0	0	0	0	0	550.801	0	47228.6
7	8234.09	2346.94	1038.74	505.234	409.058	52129.3	227440	1861.08	29899.5
8	952.723	923.087	276.78	332.311	498.597	13552.8	48707.7	2.83364	12889.8
9	0	0	0	0	0	0	0	0	0
10	0.954065	0.954065	0	0.133569	0	0	0	22758.1	0
2005	43634	38247.6	2664.97	8803.79	394.13	83680.6	354433	26585.2	100031
1	0	0	0	0	0	0	0	0	0
2	26776.5	26776.5	1340.5	7765.18	0	0	159651	0	0
3	8349.56	8349.56	15.429	242.137	0	23165.1	6445.56	551.16	21126.1
4	0	0	0	0	0	0	0	0	0
5	0	0	0	0	0	0	0	0	0
6	0	0	0	0	0	0	345.886	0	46173.8
7	7615.32	2255.57	1055.37	484.927	57.3708	48178.4	139721	2001.67	20118.7
8	891.718	865.041	253.665	311.415	336.76	12337.2	48269.6	3.43741	12612.3
9	0	0	0	0	0	0	0	0	0
10	0.93818	0.93818	0	0.131345	0	0	0	24028.9	0
2010	40301.9	34391.1	2575.66	8592.08	60.2504	73108.7	285596	26019.1	81425.1
1	0	0	0	0	0	0	0	0	0
2	26788.7	26788.7	1432.85	7768.74	0	0	150228	0	0
3	4936.56	4936.56	30.9828	143.16	4.26	23517	5637.4	569.699	15284.9
4	0	0	0	0	0	0	0	0	0
5	0	0	0	0	0	0	0	0	0
6	0	0	0	0	0	0	463.627	0	41392.9
7	7796.67	1906.86	901.553	407.171	44.2231	39124.2	81113.6	1483.07	12275.2
8	779.106	758.02	210.274	272.887	11.7673	10467.6	48153.7	4.38008	12472.1
9	0	0	0	0	0	0	0	0	0
10	0.876913	0.876913	0	0.122768	0	0	0	23961.9	0
2012	40121.8	34172.6	2295.04	8269.28	57.6767	66535	255235	24979.3	80753.9
1	0	0	0	0	0	0	0	0	0
2	25902	25902	1395.91	7511.58	0	0	142906	0	0
3	6030.46	6030.46	25.3957	174.883	0.5609	20674.2	6674.34	633.264	17327.8
4	0	0	0	0	0	0	0	0	0
5	0	0	0	0	0	0	0	0	0
6	0	0	0	0	0	0	352.813	0	42991.3
7	7435.78	1506.33	673.699	318.821	45.7434	35823.2	56952.3	658.749	7927.36
8	752.726	732.971	200.034	263.87	11.3724	10037.6	48349.4	4.66347	12507.4
9	0	0	0	0	0	0	0	0	0
10	0.849961	0.849961	0	0.118995	0	0	0	23682.6	0
2014	28673.2	23026.7	1744.19	5105.81	54.6986	63122	197570	25237.7	82229.3
1	0	0	0	0	0	0	0	0	0
2	15115.7	15115.7	872.172	4383.55	0	0	89308.2	0	0
3	5766.45	5766.45	22.7313	167.227	0.191	22012.3	4943.3	664.684	15890.4
4	0	0	0	0	0	0	0	0	0
5	0	0	0	0	0	0	0	0	0
6	0	0	0	0	0	0	352.153	0	45655.3
7	7091.23	1461.81	670.224	309.428	43.8444	32389.5	54857.3	922.611	8242.84
8	698.96	681.906	179.061	245.486	10.6633	8720.19	48109.2	4.47451	12440.9
9	0	0	0	0	0	0	0	0	0
10	0.825445	0.825445	0	0.115562	0	0	0	23646	0
Sweden	307384	204276	34415.1	36822	288028	1.26717e+06	4.74596e+06	392272	1.72849e+06
1990	58551.2	41813.7	6516.97	6851.82	99281.7	266265	1.10001e+06	56826.5	378887
1	4723.83	4085.4	206.649	244.68	19353.4	20718.1	9540.02	262.284	2880.71
2	14191.7	13437.7	1725.89	3896.92	12657	13406.3	146665	364.637	18412.7
3	4545.43	3759.69	1222.68	300.775	19715.3	23179.2	22013.7	388.81	6706.17
4	16340.9	11715.2	0	348.019	38286.7	20102.4	21438.2	2365.57	30099.6
5	387.891	158.421	0	59.9988	23.6301	93.0501	13.0401	2.3771	19838.1
6	346.703	283.363	0.833568	56.6321	2.98134	15.5107	474.455	35.1691	108348
7	10666.8	4654.87	2079.98	997.95	6157.02	139667	764801	1769.96	135308
8	2375.7	2265.15	1210.47	815.455	3033.19	34000.3	135041	10.9949	22995.3
9	651.514	650.111	70.4677	18.8532	52.5843	65.071	19.3575	2605.19	2190.07
10	4320.91	803.839	0	112.538	0	15018	0	49021.5	32108.7
1995	38860.1	25806.5	5754.4	5869	37927.3	214889	880692	56288.9	284046
1	2947.75	2372.26	198.105	189.781	11660.2	15455.9	15516.5	289.615	2512.22
2	12685.7	12033.6	1525.15	3489.74	7622.26	10460.3	134711	284.613	16771.2
3	3500.46	2797.87	909.889	223.83	13718.1	18510.4	20791.4	360.517	4123.58
4	1123.79	157.904	0	12.6323	0	0	0	0	3080.16
5	275.961	68.1404	0	40.8843	0	0	0	0	11641.4
6	385.503	284.962	0.838975	56.9925	5.35022	13.1263	400.379	29.2015	89069.4
7	10594.2	4383.19	1903.54	937.1	3192.08	122979	567134	3230.08	98850.7
8	2286.91	2179.73	1138.03	784.703	1722.43	33320.7	142069	12.0611	24648.8
9	728.083	727.018	78.8523	21.0835	6.96474	50.8487	69.3887	2663.74	2017.85
10	4331.71	801.839	0	112.257	0	14098.1	0	49419.1	31331.2
2000	45297.9	30548	5199.99	5487.9	38196.6	203991	707649	60948.1	244267
1	3176.08	2460.31	218.858	187.117	7384.11	14970.8	22276.8	439.81	2293.76
2	11179.7	10629.5	1324.41	3082.55	2587.58	7514.39	122757	204.59	15129.7
3	2455.5	1836.06	597.101	146.885	7720.84	13841.7	19569.1	332.224	1540.99
4	9964.29	7481.36	177.859	224.788	19824.4	15336.4	24007.6	2703.1	26225.6
5	229.541	43.3357	0.978859	23.6685	10.7299	109.074	28.9501	2.90229	8001.12
6	424.862	287.088	0.844419	57.3681	7.7191	10.7419	327.402	23.2339	69979.6
7	10521.7	4111.52	1727.1	876.25	227.13	106292	369465	4690.19	62393.6
8	2198.12	2094.31	1065.6	753.951	411.677	32641.1	149098	13.1274	26302.3
9	805.584	804.712	87.2505	23.3367	22.3452	96.6265	119.42	2722.29	1846.2
10	4342.51	799.839	0	111.977	0	13178.1	0	49816.6	30553.8
2005	45701.9	30306.3	4844.44	5205.89	31770.9	171975	587002	57346.2	224583
1	4662.98	3563.91	235.953	272.851	9233.21	17198.4	33449.8	623.88	3192.19
2	10591.4	10087.4	1357.26	2925.34	1488.74	6057.25	128222	189.213	14478.2
3	2197.61	1763.55	540.707	141.084	5625.84	13337.9	19896.6	318.446	1533.96
4	10082.6	7508.29	128.782	227.112	15053.1	15143.1	24721.9	2662.89	21891.7
5	269.952	57.8546	1.06737	32.1622	12.6897	73.4398	20.8477	2.47968	8501.23
6	407.163	279.464	0.859082	55.8389	7.0849	10.9045	332.715	23.7346	80571.3
7	10508.2	3609.9	1578.23	763.837	100.558	81887.6	220131	4335.02	37496.5
8	1903.63	1814.51	912.199	653.224	238.741	26263.2	160073	11.7257	26667.4
9	834.503	833.951	89.3832	24.1846	10.9671	178.78	153.399	2735.01	1476.83
10	4243.85	787.53	0	110.254	0	11824.3	0	46443.8	28773.1
2010	42676.7	27670.4	4398.42	4813.14	30302.2	147400	525351	53664.2	213630
1	6085.13	4663.64	260.445	359.8	10408.2	20972.8	46455.6	842.262	4155.76
2	9662.1	9206.53	1233	2669.89	1011.02	5447.6	121564	184.22	13075.9
3	2325.72	1863.27	559.673	149.062	5317.29	14252.6	22730.3	338.381	1708.14
4	7127.96	5159.87	96.8884	155.467	13075.1	14165	23664.9	2430.91	22814.4
5	374.29	140.151	13.8088	51.2185	239.973	403.375	73.8744	7.8899	7528.97
6	311.535	211.013	0.705559	42.1593	5.28197	8.23854	251.39	17.946	86792.8
7	9770.57	2982.05	1233.73	624.901	80.2849	58765.2	128780	3155.4	21622.7
8	1815.35	1731.91	908.004	623.488	154.842	21322.3	181647	9.05943	26275.3
9	924.013	923.628	92.1668	26.7852	10.2117	146.452	183.985	2765.47	997.798
10	4280.08	788.367	0	110.371	0	11916.2	0	43912.6	28658.1
2012	39982.7	25863.8	4040.37	4504.73	27441.5	134659	483302	53297.9	196546
1	5285.61	4060.22	229.339	311.265	8279.1	17369.7	41330.1	748.229	3547.3
2	9058.02	8641.95	1205.34	2506.16	925.894	5058.32	119554	176.092	12395.6
3	2171.24	1733.52	512.399	138.682	4615.31	13406.8	21518.4	317.837	1607.27
4	6708.77	5132.27	79.335	153.943	13357.6	14699.9	27623.5	2466.39	21762.3
5	240.2	68.1075	0.903085	38.6767	19.5265	200.082	52.8592	4.32375	7729.72
6	269.664	187.219	0.680293	37.4003	4.17061	7.8361	239.398	17.2387	83468.8
7	9251.71	2651.85	992.936	552.256	71.0623	51229.9	88297.5	2590.92	12958.1
8	1836.34	1751.8	926.33	630.648	157.757	21536.8	184474	8.67752	23922.3
9	842.554	842.076	93.1077	24.4202	11.0953	160.253	212.533	2793.35	858.57
10	4318.64	794.802	0	111.272	0	10989.6	0	44174.8	28296.1
2014	36313.1	22266.6	3660.51	4089.5	23108.1	127990	461956	53899.8	186531
1	4634.4	3550.2	201.086	271.544	6602.05	15246.2	38022.3	686.509	3080.05
2	8081.37	7711.4	1101.94	2236.3	851.58	4729.24	114048	161.746	11255.4
3	2034.62	1622.27	461.946	129.782	4100.77	12829.4	20484.6	303.446	1520.54
4	4936.19	3315.65	66.1192	101.698	11298	14679.3	28558.1	2464.94	20816.2
5	264.091	76.5627	1.16768	43.1276	15.4891	162.274	45.8293	4.18855	6365.17
6	283.302	193.293	0.667604	38.6128	4.65985	7.72399	235.892	16.8832	80499.7
7	9037.82	2459.58	839.027	509.706	66.2711	46901.8	76282.7	2180.22	11029.8
8	1809.63	1726.5	894.706	621.54	157.985	20980.8	184070	8.59665	22280
9	796.697	796.236	93.8456	23.0908	11.3428	139.249	208.417	2787.11	726.444
10	4435.02	814.926	0	114.09	0	12314.1	0	45286.2	28957.6

## Sheet: Table S3, Nordic shipping
Emissions [ton/year]
	Ash	PM2.5	EC	OC	SOx	SO4	NOx	CO	NMVOC
Shipping
1990	4125.82	62917.5	5638.66	14120.2	472479	39032.9	944876	58426.1	7628.51
1995	4363.16	66536.9	5963.03	14932.5	496828	41278.3	993571	61437.1	7626.24
2000	4649.59	71008.9	6354.46	15913.1	532171	44092.1	1.02589e+06	65399	7651.9
2005	4445.1	67266.5	6075.06	15213.9	493668	41532.8	964286	62752.1	7324.78
2010	3992.68	43804.4	5456.65	13685.6	236443	20669.7	895538	60006.4	7023.99
2012	3944.38	41030.5	5390.71	13518.1	206754	18177.4	862763	59202.3	6937.63
2014	3774.18	39264.7	5158.04	12951.8	198438	17380.6	773309	55520.7	6536.15

## Sheet: CAMS-REGv4.2_rawData
Country	Year	GNFR sector	Pollutant	Emissions [ton/year]
Denmark	2010	A	PM10	604.596
Denmark	2010	A	PM2.5	482.861
Denmark	2010	A	EC	44.1116
Denmark	2010	A	OC	50.4768
Denmark	2010	A	SO2	3611.68
Denmark	2010	A	NOX	19064.1
Denmark	2010	A	CO	11505.2
Denmark	2010	A	NH3	10.8028
Denmark	2010	A	NMVOC	2371.21
Denmark	2010	B	PM10	3143.3
Denmark	2010	B	PM2.5	778.443
Denmark	2010	B	EC	16.4925
Denmark	2010	B	OC	55.6504
Denmark	2010	B	SO2	6298.59
Denmark	2010	B	NOX	14617.8
Denmark	2010	B	CO	4693.27
Denmark	2010	B	NH3	706.054
Denmark	2010	B	NMVOC	9629.2
Denmark	2010	C	PM10	17768.3
Denmark	2010	C	PM2.5	17386.8
Denmark	2010	C	EC	8594.45
Denmark	2010	C	OC	6896.1
Denmark	2010	C	SO2	2419.48
Denmark	2010	C	NOX	6993.68
Denmark	2010	C	CO	114334
Denmark	2010	C	NH3	1959.23
Denmark	2010	C	NMVOC	17700
Denmark	2010	D	PM10	279.57
Denmark	2010	D	PM2.5	32.7705
Denmark	2010	D	EC	20.4815
Denmark	2010	D	OC	3.27705
Denmark	2010	D	SO2	327.56
Denmark	2010	D	NOX	166.289
Denmark	2010	D	CO	283.476
Denmark	2010	D	NH3	0
Denmark	2010	D	NMVOC	5495.2
Denmark	2010	E	PM10	395.229
Denmark	2010	E	PM2.5	309.207
Denmark	2010	E	EC	0
Denmark	2010	E	OC	0
Denmark	2010	E	SO2	38.6187
Denmark	2010	E	NOX	41.6796
Denmark	2010	E	CO	2531.81
Denmark	2010	E	NH3	40.2623
Denmark	2010	E	NMVOC	27304.6
Denmark	2010	F1	PM10	54.1413
Denmark	2010	F1	PM2.5	54.1413
Denmark	2010	F1	EC	15.0191
Denmark	2010	F1	OC	29.6124
Denmark	2010	F1	SO2	25.4743
Denmark	2010	F1	NOX	6025.14
Denmark	2010	F1	CO	116673
Denmark	2010	F1	NH3	1633.19
Denmark	2010	F1	NMVOC	10629.4
Denmark	2010	F2	PM10	1560.02
Denmark	2010	F2	PM2.5	1560.02
Denmark	2010	F2	EC	1074.02
Denmark	2010	F2	OC	364.497
Denmark	2010	F2	SO2	51.4953
Denmark	2010	F2	NOX	46765
Denmark	2010	F2	CO	14597.1
Denmark	2010	F2	NH3	154.833
Denmark	2010	F2	NMVOC	2224.41
Denmark	2010	F3	PM10	0
Denmark	2010	F3	PM2.5	0
Denmark	2010	F3	EC	0
Denmark	2010	F3	OC	0
Denmark	2010	F3	SO2	0
Denmark	2010	F3	NOX	5.57205
Denmark	2010	F3	CO	25.8919
Denmark	2010	F3	NH3	1.11448
Denmark	2010	F3	NMVOC	7.25426
Denmark	2010	F4	PM10	1577.27
Denmark	2010	F4	PM2.5	866.432
Denmark	2010	F4	EC	14.428
Denmark	2010	F4	OC	55.8867
Denmark	2010	F4	SO2	0
Denmark	2010	F4	NOX	0
Denmark	2010	F4	CO	0
Denmark	2010	F4	NH3	0
Denmark	2010	F4	NMVOC	1842.95
Denmark	2010	H	PM10	10.4267
Denmark	2010	H	PM2.5	10.4267
Denmark	2010	H	EC	0
Denmark	2010	H	OC	1.87681
Denmark	2010	H	SO2	99.9717
Denmark	2010	H	NOX	1308.32
Denmark	2010	H	CO	1342.9
Denmark	2010	H	NH3	0.111256
Denmark	2010	H	NMVOC	180.447
Denmark	2010	I	PM10	1523.02
Denmark	2010	I	PM2.5	1523.02
Denmark	2010	I	EC	454.987
Denmark	2010	I	OC	718.667
Denmark	2010	I	SO2	127.383
Denmark	2010	I	NOX	19587.3
Denmark	2010	I	CO	74749.3
Denmark	2010	I	NH3	6.98705
Denmark	2010	I	NMVOC	5950.17
Denmark	2010	J	PM10	279.367
Denmark	2010	J	PM2.5	278.886
Denmark	2010	J	EC	50.9125
Denmark	2010	J	OC	138.307
Denmark	2010	J	SO2	530.437
Denmark	2010	J	NOX	89.1404
Denmark	2010	J	CO	1062.41
Denmark	2010	J	NH3	608.421
Denmark	2010	J	NMVOC	456.501
Denmark	2010	K	PM10	2545.98
Denmark	2010	K	PM2.5	555.378
Denmark	2010	K	EC	0
Denmark	2010	K	OC	384.492
Denmark	2010	K	SO2	0
Denmark	2010	K	NOX	0
Denmark	2010	K	CO	0
Denmark	2010	K	NH3	39662.3
Denmark	2010	K	NMVOC	0
Denmark	2010	L	PM10	5677.88
Denmark	2010	L	PM2.5	479.184
Denmark	2010	L	EC	9.68538
Denmark	2010	L	OC	65.4229
Denmark	2010	L	SO2	0.540309
Denmark	2010	L	NOX	4.37931
Denmark	2010	L	CO	127
Denmark	2010	L	NH3	34767.2
Denmark	2010	L	NMVOC	1528.73
Finland	2010	A	PM10	2173.08
Finland	2010	A	PM2.5	733.383
Finland	2010	A	EC	65.6554
Finland	2010	A	OC	85.85
Finland	2010	A	SO2	30450.1
Finland	2010	A	NOX	42630.4
Finland	2010	A	CO	13472.3
Finland	2010	A	NH3	2.74
Finland	2010	A	NMVOC	1376.72
Finland	2010	B	PM10	6824.92
Finland	2010	B	PM2.5	4178.29
Finland	2010	B	EC	173.057
Finland	2010	B	OC	152.147
Finland	2010	B	SO2	28244
Finland	2010	B	NOX	33974.3
Finland	2010	B	CO	44676.2
Finland	2010	B	NH3	615.586
Finland	2010	B	NMVOC	14824.2
Finland	2010	C	PM10	12840.4
Finland	2010	C	PM2.5	11588.8
Finland	2010	C	EC	5136.38
Finland	2010	C	OC	5106.93
Finland	2010	C	SO2	5965.73
Finland	2010	C	NOX	12188.3
Finland	2010	C	CO	194127
Finland	2010	C	NH3	1364.67
Finland	2010	C	NMVOC	25240.2
Finland	2010	D	PM10	1991.97
Finland	2010	D	PM2.5	1398.91
Finland	2010	D	EC	639.086
Finland	2010	D	OC	315.667
Finland	2010	D	SO2	0
Finland	2010	D	NOX	0
Finland	2010	D	CO	0
Finland	2010	D	NH3	0
Finland	2010	D	NMVOC	4069.85
Finland	2010	E	PM10	221.868
Finland	2010	E	PM2.5	211.077
Finland	2010	E	EC	0
Finland	2010	E	OC	0
Finland	2010	E	SO2	52.5389
Finland	2010	E	NOX	8.03716
Finland	2010	E	CO	244.65
Finland	2010	E	NH3	175.929
Finland	2010	E	NMVOC	20903.3
Finland	2010	F1	PM10	81.8087
Finland	2010	F1	PM2.5	81.8087
Finland	2010	F1	EC	22.4085
Finland	2010	F1	OC	44.9592
Finland	2010	F1	SO2	23.5536
Finland	2010	F1	NOX	10245.5
Finland	2010	F1	CO	81585.4
Finland	2010	F1	NH3	1496.45
Finland	2010	F1	NMVOC	9547.73
Finland	2010	F2	PM10	1618.33
Finland	2010	F2	PM2.5	1618.33
Finland	2010	F2	EC	1097.05
Finland	2010	F2	OC	390.959
Finland	2010	F2	SO2	45.345
Finland	2010	F2	NOX	41526
Finland	2010	F2	CO	13749.2
Finland	2010	F2	NH3	101.795
Finland	2010	F2	NMVOC	1896.69
Finland	2010	F3	PM10	0
Finland	2010	F3	PM2.5	0
Finland	2010	F3	EC	0
Finland	2010	F3	OC	0
Finland	2010	F3	SO2	0
Finland	2010	F3	NOX	30.3543
Finland	2010	F3	CO	32.6169
Finland	2010	F3	NH3	3.55859
Finland	2010	F3	NMVOC	20.9471
Finland	2010	F4	PM10	7116.61
Finland	2010	F4	PM2.5	1110.86
Finland	2010	F4	EC	11.2962
Finland	2010	F4	OC	121.072
Finland	2010	F4	SO2	0
Finland	2010	F4	NOX	0
Finland	2010	F4	CO	0
Finland	2010	F4	NH3	0
Finland	2010	F4	NMVOC	2243.11
Finland	2010	G	PM10	14.8885
Finland	2010	G	PM2.5	14.8885
Finland	2010	G	EC	6.3874
Finland	2010	G	OC	4.44503
Finland	2010	G	SO2	5.20106
Finland	2010	G	NOX	233.825
Finland	2010	G	CO	13.1937
Finland	2010	G	NH3	0
Finland	2010	G	NMVOC	15.0767
Finland	2010	H	PM10	6.19864
Finland	2010	H	PM2.5	6.19864
Finland	2010	H	EC	0
Finland	2010	H	OC	1.11576
Finland	2010	H	SO2	51.6202
Finland	2010	H	NOX	723.288
Finland	2010	H	CO	1196.62
Finland	2010	H	NH3	0
Finland	2010	H	NMVOC	145.786
Finland	2010	I	PM10	1762.95
Finland	2010	I	PM2.5	1760.92
Finland	2010	I	EC	477.993
Finland	2010	I	OC	870.034
Finland	2010	I	SO2	60.2328
Finland	2010	I	NOX	24203.8
Finland	2010	I	CO	81838
Finland	2010	I	NH3	6.44582
Finland	2010	I	NMVOC	12239
Finland	2010	J	PM10	142.314
Finland	2010	J	PM2.5	141.572
Finland	2010	J	EC	26.1865
Finland	2010	J	OC	70.0467
Finland	2010	J	SO2	0
Finland	2010	J	NOX	0
Finland	2010	J	CO	0
Finland	2010	J	NH3	485.433
Finland	2010	J	NMVOC	140.249
Finland	2010	K	PM10	445.34
Finland	2010	K	PM2.5	143.97
Finland	2010	K	EC	0
Finland	2010	K	OC	99.6717
Finland	2010	K	SO2	0
Finland	2010	K	NOX	0
Finland	2010	K	CO	0
Finland	2010	K	NH3	18502
Finland	2010	K	NMVOC	0
Finland	2010	L	PM10	1722.42
Finland	2010	L	PM2.5	213.463
Finland	2010	L	EC	0.354296
Finland	2010	L	OC	18.9071
Finland	2010	L	SO2	0.317708
Finland	2010	L	NOX	7.81453
Finland	2010	L	CO	74.6775
Finland	2010	L	NH3	12792.1
Finland	2010	L	NMVOC	3874.41
Iceland	2010	A	PM10	111.109
Iceland	2010	A	PM2.5	74.5889
Iceland	2010	A	EC	7.45889
Iceland	2010	A	OC	14.9178
Iceland	2010	A	SO2	14.6298
Iceland	2010	A	NOX	15.7785
Iceland	2010	A	CO	5.97018
Iceland	2010	A	NH3	0.0243177
Iceland	2010	A	NMVOC	0.176738
Iceland	2010	B	PM10	576.377
Iceland	2010	B	PM2.5	488.441
Iceland	2010	B	EC	0.0265478
Iceland	2010	B	OC	92.9785
Iceland	2010	B	SO2	13463.1
Iceland	2010	B	NOX	2543.45
Iceland	2010	B	CO	98706.3
Iceland	2010	B	NH3	14.5007
Iceland	2010	B	NMVOC	394.685
Iceland	2010	C	PM10	5.39316
Iceland	2010	C	PM2.5	3.78565
Iceland	2010	C	EC	1.95076
Iceland	2010	C	OC	1.51203
Iceland	2010	C	SO2	17.5427
Iceland	2010	C	NOX	15.5609
Iceland	2010	C	CO	11.2025
Iceland	2010	C	NH3	0.00104587
Iceland	2010	C	NMVOC	0.67576
Iceland	2010	D	PM10	0
Iceland	2010	D	PM2.5	0
Iceland	2010	D	EC	0
Iceland	2010	D	OC	0
Iceland	2010	D	SO2	58680.5
Iceland	2010	D	NOX	0
Iceland	2010	D	CO	0
Iceland	2010	D	NH3	0
Iceland	2010	D	NMVOC	196.33
Iceland	2010	E	PM10	58.402
Iceland	2010	E	PM2.5	34.8699
Iceland	2010	E	EC	0
Iceland	2010	E	OC	0
Iceland	2010	E	SO2	1.48118
Iceland	2010	E	NOX	0.753895
Iceland	2010	E	CO	22.6808
Iceland	2010	E	NH3	1.44415
Iceland	2010	E	NMVOC	1136.68
Iceland	2010	F1	PM10	13.6133
Iceland	2010	F1	PM2.5	13.6133
Iceland	2010	F1	EC	4.084
Iceland	2010	F1	OC	7.21507
Iceland	2010	F1	SO2	2.62124
Iceland	2010	F1	NOX	721.342
Iceland	2010	F1	CO	7381.92
Iceland	2010	F1	NH3	119.211
Iceland	2010	F1	NMVOC	833.536
Iceland	2010	F2	PM10	85.4345
Iceland	2010	F2	PM2.5	85.4345
Iceland	2010	F2	EC	56.3054
Iceland	2010	F2	OC	21.8468
Iceland	2010	F2	SO2	0.492191
Iceland	2010	F2	NOX	1853.62
Iceland	2010	F2	CO	685.968
Iceland	2010	F2	NH3	3.68881
Iceland	2010	F2	NMVOC	130.385
Iceland	2010	F3	PM10	0
Iceland	2010	F3	PM2.5	0
Iceland	2010	F3	EC	0
Iceland	2010	F3	OC	0
Iceland	2010	F3	SO2	0
Iceland	2010	F3	NOX	0
Iceland	2010	F3	CO	0
Iceland	2010	F3	NH3	0
Iceland	2010	F3	NMVOC	0
Iceland	2010	F4	PM10	87.3171
Iceland	2010	F4	PM2.5	47.4772
Iceland	2010	F4	EC	0.791584
Iceland	2010	F4	OC	2.79003
Iceland	2010	F4	SO2	0
Iceland	2010	F4	NOX	0
Iceland	2010	F4	CO	0
Iceland	2010	F4	NH3	0
Iceland	2010	F4	NMVOC	140.215
Iceland	2010	H	PM10	1.11969
Iceland	2010	H	PM2.5	1.11969
Iceland	2010	H	EC	0
Iceland	2010	H	OC	0.201543
Iceland	2010	H	SO2	9.70364
Iceland	2010	H	NOX	135.66
Iceland	2010	H	CO	91.3745
Iceland	2010	H	NH3	0
Iceland	2010	H	NMVOC	0.511157
Iceland	2010	I	PM10	67.8014
Iceland	2010	I	PM2.5	67.8014
Iceland	2010	I	EC	30.4525
Iceland	2010	I	OC	21.7061
Iceland	2010	I	SO2	128.9
Iceland	2010	I	NOX	1051.47
Iceland	2010	I	CO	347.192
Iceland	2010	I	NH3	0
Iceland	2010	I	NMVOC	108.824
Iceland	2010	J	PM10	136.539
Iceland	2010	J	PM2.5	95.7859
Iceland	2010	J	EC	23.0581
Iceland	2010	J	OC	44.3511
Iceland	2010	J	SO2	26.1166
Iceland	2010	J	NOX	23.4233
Iceland	2010	J	CO	131.792
Iceland	2010	J	NH3	3.68545
Iceland	2010	J	NMVOC	265.497
Iceland	2010	K	PM10	101.688
Iceland	2010	K	PM2.5	29.4723
Iceland	2010	K	EC	0
Iceland	2010	K	OC	20.4039
Iceland	2010	K	SO2	0
Iceland	2010	K	NOX	0
Iceland	2010	K	CO	0
Iceland	2010	K	NH3	2321.54
Iceland	2010	K	NMVOC	0
Iceland	2010	L	PM10	71.2629
Iceland	2010	L	PM2.5	3.42008
Iceland	2010	L	EC	0.547213
Iceland	2010	L	OC	1.86789
Iceland	2010	L	SO2	0
Iceland	2010	L	NOX	0
Iceland	2010	L	CO	0
Iceland	2010	L	NH3	2735.36
Iceland	2010	L	NMVOC	6.40884e-05
Norway	2010	A	PM10	740.568
Norway	2010	A	PM2.5	631.212
Norway	2010	A	EC	63.414
Norway	2010	A	OC	122.255
Norway	2010	A	SO2	1646.57
Norway	2010	A	NOX	2018
Norway	2010	A	CO	5788.15
Norway	2010	A	NH3	0
Norway	2010	A	NMVOC	1443.01
Norway	2010	B	PM10	9352.33
Norway	2010	B	PM2.5	5360.87
Norway	2010	B	EC	266.035
Norway	2010	B	OC	1098.34
Norway	2010	B	SO2	13752.7
Norway	2010	B	NOX	68632.7
Norway	2010	B	CO	165546
Norway	2010	B	NH3	521.554
Norway	2010	B	NMVOC	14245.6
Norway	2010	C	PM10	25394
Norway	2010	C	PM2.5	24605.2
Norway	2010	C	EC	13278
Norway	2010	C	OC	9796.5
Norway	2010	C	SO2	907.382
Norway	2010	C	NOX	2772.16
Norway	2010	C	CO	150654
Norway	2010	C	NH3	94.7476
Norway	2010	C	NMVOC	10447.3
Norway	2010	D	PM10	1077.24
Norway	2010	D	PM2.5	814.524
Norway	2010	D	EC	15.8163
Norway	2010	D	OC	9.72406
Norway	2010	D	SO2	33.7253
Norway	2010	D	NOX	1271.74
Norway	2010	D	CO	1236.83
Norway	2010	D	NH3	0
Norway	2010	D	NMVOC	43881.3
Norway	2010	E	PM10	452.411
Norway	2010	E	PM2.5	307.952
Norway	2010	E	EC	0
Norway	2010	E	OC	0
Norway	2010	E	SO2	9.02975
Norway	2010	E	NOX	14.02
Norway	2010	E	CO	485.25
Norway	2010	E	NH3	16.3377
Norway	2010	E	NMVOC	41414.9
Norway	2010	F1	PM10	10.4128
Norway	2010	F1	PM2.5	9.95271
Norway	2010	F1	EC	2.55212
Norway	2010	F1	OC	5.6002
Norway	2010	F1	SO2	10.0493
Norway	2010	F1	NOX	1991.37
Norway	2010	F1	CO	50556.1
Norway	2010	F1	NH3	888.772
Norway	2010	F1	NMVOC	5827.42
Norway	2010	F2	PM10	1306.49
Norway	2010	F2	PM2.5	1244.1
Norway	2010	F2	EC	879.234
Norway	2010	F2	OC	273.648
Norway	2010	F2	SO2	33.5012
Norway	2010	F2	NOX	36734.5
Norway	2010	F2	CO	17445
Norway	2010	F2	NH3	172.183
Norway	2010	F2	NMVOC	3168.32
Norway	2010	F3	PM10	7.09966
Norway	2010	F3	PM2.5	6.78594
Norway	2010	F3	EC	2.03578
Norway	2010	F3	OC	3.59655
Norway	2010	F3	SO2	0
Norway	2010	F3	NOX	1201.5
Norway	2010	F3	CO	3301.28
Norway	2010	F3	NH3	422.635
Norway	2010	F3	NMVOC	1587.68
Norway	2010	F4	PM10	1932.63
Norway	2010	F4	PM2.5	616.916
Norway	2010	F4	EC	9.25374
Norway	2010	F4	OC	41.7746
Norway	2010	F4	SO2	0
Norway	2010	F4	NOX	0
Norway	2010	F4	CO	0
Norway	2010	F4	NH3	0
Norway	2010	F4	NMVOC	767.984
Norway	2010	H	PM10	15.6056
Norway	2010	H	PM2.5	15.6056
Norway	2010	H	EC	0
Norway	2010	H	OC	2.80902
Norway	2010	H	SO2	42.1784
Norway	2010	H	NOX	1576.21
Norway	2010	H	CO	2464.93
Norway	2010	H	NH3	0
Norway	2010	H	NMVOC	405.333
Norway	2010	I	PM10	1279.8
Norway	2010	I	PM2.5	1254.03
Norway	2010	I	EC	503.036
Norway	2010	I	OC	465.578
Norway	2010	I	SO2	43.9577
Norway	2010	I	NOX	17256
Norway	2010	I	CO	112477
Norway	2010	I	NH3	5.7179
Norway	2010	I	NMVOC	21852
Norway	2010	J	PM10	283.483
Norway	2010	J	PM2.5	282.241
Norway	2010	J	EC	53.2626
Norway	2010	J	OC	136.361
Norway	2010	J	SO2	3.82349
Norway	2010	J	NOX	16.8992
Norway	2010	J	CO	37.6448
Norway	2010	J	NH3	340.13
Norway	2010	J	NMVOC	1026.38
Norway	2010	K	PM10	916.315
Norway	2010	K	PM2.5	288.346
Norway	2010	K	EC	0
Norway	2010	K	OC	199.624
Norway	2010	K	SO2	0
Norway	2010	K	NOX	0
Norway	2010	K	CO	0
Norway	2010	K	NH3	11647.8
Norway	2010	K	NMVOC	0
Norway	2010	L	PM10	560.63
Norway	2010	L	PM2.5	29.2159
Norway	2010	L	EC	2.25417
Norway	2010	L	OC	7.27052
Norway	2010	L	SO2	0.429694
Norway	2010	L	NOX	3.48276
Norway	2010	L	CO	101
Norway	2010	L	NH3	19247.9
Norway	2010	L	NMVOC	728.523
Sweden	2010	A	PM10	2545.56
Sweden	2010	A	PM2.5	1940.84
Sweden	2010	A	EC	193.26
Sweden	2010	A	OC	366.895
Sweden	2010	A	SO2	6788.38
Sweden	2010	A	NOX	15686.9
Sweden	2010	A	CO	7860.51
Sweden	2010	A	NH3	367.792
Sweden	2010	A	NMVOC	3915.7
Sweden	2010	B	PM10	9024.65
Sweden	2010	B	PM2.5	6612.7
Sweden	2010	B	EC	202.586
Sweden	2010	B	OC	343.114
Sweden	2010	B	SO2	18384.4
Sweden	2010	B	NOX	30404
Sweden	2010	B	CO	28175.8
Sweden	2010	B	NH3	2687.06
Sweden	2010	B	NMVOC	20556.6
Sweden	2010	C	PM10	9655.58
Sweden	2010	C	PM2.5	9200.86
Sweden	2010	C	EC	3482.42
Sweden	2010	C	OC	3685.57
Sweden	2010	C	SO2	968.182
Sweden	2010	C	NOX	5388.65
Sweden	2010	C	CO	121524
Sweden	2010	C	NH3	183.375
Sweden	2010	C	NMVOC	13070.9
Sweden	2010	D	PM10	397.776
Sweden	2010	D	PM2.5	163.636
Sweden	2010	D	EC	73.6364
Sweden	2010	D	OC	37.7622
Sweden	2010	D	SO2	239.382
Sweden	2010	D	NOX	336.804
Sweden	2010	D	CO	60.247
Sweden	2010	D	NH3	6.58713
Sweden	2010	D	NMVOC	5341.88
Sweden	2010	E	PM10	291.517
Sweden	2010	E	PM2.5	207.6
Sweden	2010	E	EC	0
Sweden	2010	E	OC	0
Sweden	2010	E	SO2	5.28198
Sweden	2010	E	NOX	8.23856
Sweden	2010	E	CO	250.777
Sweden	2010	E	NH3	17.946
Sweden	2010	E	NMVOC	61843.6
Sweden	2010	F1	PM10	48.8342
Sweden	2010	F1	PM2.5	48.8342
Sweden	2010	F1	EC	14.6503
Sweden	2010	F1	OC	25.8821
Sweden	2010	F1	SO2	41.2899
Sweden	2010	F1	NOX	7712.82
Sweden	2010	F1	CO	114113
Sweden	2010	F1	NH3	2934.36
Sweden	2010	F1	NMVOC	17757.7
Sweden	2010	F2	PM10	1376.01
Sweden	2010	F2	PM2.5	1376.01
Sweden	2010	F2	EC	934.772
Sweden	2010	F2	OC	330.927
Sweden	2010	F2	SO2	39.2969
Sweden	2010	F2	NOX	52219
Sweden	2010	F2	CO	14809.1
Sweden	2010	F2	NH3	207.28
Sweden	2010	F2	NMVOC	2466.12
Sweden	2010	F3	PM10	0
Sweden	2010	F3	PM2.5	0
Sweden	2010	F3	EC	0
Sweden	2010	F3	OC	0
Sweden	2010	F3	SO2	0
Sweden	2010	F3	NOX	43.9361
Sweden	2010	F3	CO	88.7261
Sweden	2010	F3	NH3	13.7929
Sweden	2010	F3	NMVOC	75.5279
Sweden	2010	F4	PM10	13957.9
Sweden	2010	F4	PM2.5	2791.57
Sweden	2010	F4	EC	32.257
Sweden	2010	F4	OC	202.009
Sweden	2010	F4	SO2	0
Sweden	2010	F4	NOX	0
Sweden	2010	F4	CO	0
Sweden	2010	F4	NH3	0
Sweden	2010	F4	NMVOC	1270.34
Sweden	2010	H	PM10	27.3412
Sweden	2010	H	PM2.5	27.3412
Sweden	2010	H	EC	0
Sweden	2010	H	OC	4.92142
Sweden	2010	H	SO2	93.5319
Sweden	2010	H	NOX	948.796
Sweden	2010	H	CO	1440.21
Sweden	2010	H	NH3	0
Sweden	2010	H	NMVOC	156.014
Sweden	2010	I	PM10	1591.02
Sweden	2010	I	PM2.5	1507.96
Sweden	2010	I	EC	172.775
Sweden	2010	I	OC	985.833
Sweden	2010	I	SO2	60.8459
Sweden	2010	I	NOX	20755.8
Sweden	2010	I	CO	146104
Sweden	2010	I	NH3	9.15911
Sweden	2010	I	NMVOC	15975
Sweden	2010	J	PM10	877.286
Sweden	2010	J	PM2.5	865.327
Sweden	2010	J	EC	157.977
Sweden	2010	J	OC	429.31
Sweden	2010	J	SO2	11.2553
Sweden	2010	J	NOX	176.622
Sweden	2010	J	CO	713.667
Sweden	2010	J	NH3	1233.36
Sweden	2010	J	NMVOC	1000.83
Sweden	2010	K	PM10	2244.93
Sweden	2010	K	PM2.5	580.437
Sweden	2010	K	EC	0
Sweden	2010	K	OC	401.841
Sweden	2010	K	SO2	0
Sweden	2010	K	NOX	0
Sweden	2010	K	CO	0
Sweden	2010	K	NH3	22514.8
Sweden	2010	K	NMVOC	0
Sweden	2010	L	PM10	2132.05
Sweden	2010	L	PM2.5	237.054
Sweden	2010	L	EC	1.0884
Sweden	2010	L	OC	22.2452
Sweden	2010	L	SO2	0.459475
Sweden	2010	L	NOX	3.72414
Sweden	2010	L	CO	108
Sweden	2010	L	NH3	24359.1
Sweden	2010	L	NMVOC	10255.3

## Sheet: Table S4, CAMS-REGv4.2
Emissions [ton/year]
	PM10	PM2.5	EC	OC	SO2	NOX	CO	NH3	NMVOC
Denmark	35419.1	24317.5	10294.6	8764.27	13531.2	114668	341925	79550.5	85320
2010	35419.1	24317.5	10294.6	8764.27	13531.2	114668	341925	79550.5	85320
A	604.596	482.861	44.1116	50.4768	3611.68	19064.1	11505.2	10.8028	2371.21
B	3143.3	778.443	16.4925	55.6504	6298.59	14617.8	4693.27	706.054	9629.2
C	17768.3	17386.8	8594.45	6896.1	2419.48	6993.68	114334	1959.23	17700
D	279.57	32.7705	20.4815	3.27705	327.56	166.289	283.476	0	5495.2
E	395.229	309.207	0	0	38.6187	41.6796	2531.81	40.2623	27304.6
F1	54.1413	54.1413	15.0191	29.6124	25.4743	6025.14	116673	1633.19	10629.4
F2	1560.02	1560.02	1074.02	364.497	51.4953	46765	14597.1	154.833	2224.41
F3	0	0	0	0	0	5.57205	25.8919	1.11448	7.25426
F4	1577.27	866.432	14.428	55.8867	0	0	0	0	1842.95
H	10.4267	10.4267	0	1.87681	99.9717	1308.32	1342.9	0.111256	180.447
I	1523.02	1523.02	454.987	718.667	127.383	19587.3	74749.3	6.98705	5950.17
J	279.367	278.886	50.9125	138.307	530.437	89.1404	1062.41	608.421	456.501
K	2545.98	555.378	0	384.492	0	0	0	39662.3	0
L	5677.88	479.184	9.68538	65.4229	0.540309	4.37931	127	34767.2	1528.73
Finland	36963.1	23202.5	7655.86	7281.81	64898.6	165772	431009	35546.7	96537.2
2010	36963.1	23202.5	7655.86	7281.81	64898.6	165772	431009	35546.7	96537.2
A	2173.08	733.383	65.6554	85.85	30450.1	42630.4	13472.3	2.74	1376.72
B	6824.92	4178.29	173.057	152.147	28244	33974.3	44676.2	615.586	14824.2
C	12840.4	11588.8	5136.38	5106.93	5965.73	12188.3	194127	1364.67	25240.2
D	1991.97	1398.91	639.086	315.667	0	0	0	0	4069.85
E	221.868	211.077	0	0	52.5389	8.03716	244.65	175.929	20903.3
F1	81.8087	81.8087	22.4085	44.9592	23.5536	10245.5	81585.4	1496.45	9547.73
F2	1618.33	1618.33	1097.05	390.959	45.345	41526	13749.2	101.795	1896.69
F3	0	0	0	0	0	30.3543	32.6169	3.55859	20.9471
F4	7116.61	1110.86	11.2962	121.072	0	0	0	0	2243.11
G	14.8885	14.8885	6.3874	4.44503	5.20106	233.825	13.1937	0	15.0767
H	6.19864	6.19864	0	1.11576	51.6202	723.288	1196.62	0	145.786
I	1762.95	1760.92	477.993	870.034	60.2328	24203.8	81838	6.44582	12239
J	142.314	141.572	26.1865	70.0467	0	0	0	485.433	140.249
K	445.34	143.97	0	99.6717	0	0	0	18502	0
L	1722.42	213.463	0.354296	18.9071	0.317708	7.81453	74.6775	12792.1	3874.41
Iceland	1316.06	945.81	124.675	229.791	72345.1	6361.06	107384	5199.46	3207.52
2010	1316.06	945.81	124.675	229.791	72345.1	6361.06	107384	5199.46	3207.52
A	111.109	74.5889	7.45889	14.9178	14.6298	15.7785	5.97018	0.0243177	0.176738
B	576.377	488.441	0.0265478	92.9785	13463.1	2543.45	98706.3	14.5007	394.685
C	5.39316	3.78565	1.95076	1.51203	17.5427	15.5609	11.2025	0.00104587	0.67576
D	0	0	0	0	58680.5	0	0	0	196.33
E	58.402	34.8699	0	0	1.48118	0.753895	22.6808	1.44415	1136.68
F1	13.6133	13.6133	4.084	7.21507	2.62124	721.342	7381.92	119.211	833.536
F2	85.4345	85.4345	56.3054	21.8468	0.492191	1853.62	685.968	3.68881	130.385
F3	0	0	0	0	0	0	0	0	0
F4	87.3171	47.4772	0.791584	2.79003	0	0	0	0	140.215
H	1.11969	1.11969	0	0.201543	9.70364	135.66	91.3745	0	0.511157
I	67.8014	67.8014	30.4525	21.7061	128.9	1051.47	347.192	0	108.824
J	136.539	95.7859	23.0581	44.3511	26.1166	23.4233	131.792	3.68545	265.497
K	101.688	29.4723	0	20.4039	0	0	0	2321.54	0
L	71.2629	3.42008	0.547213	1.86789	0	0	0	2735.36	6.40884e-05
Norway	43329	35467	15074.9	12163.1	16483.4	133489	510093	33357.8	146796
2010	43329	35467	15074.9	12163.1	16483.4	133489	510093	33357.8	146796
A	740.568	631.212	63.414	122.255	1646.57	2018	5788.15	0	1443.01
B	9352.33	5360.87	266.035	1098.34	13752.7	68632.7	165546	521.554	14245.6
C	25394	24605.2	13278	9796.5	907.382	2772.16	150654	94.7476	10447.3
D	1077.24	814.524	15.8163	9.72406	33.7253	1271.74	1236.83	0	43881.3
E	452.411	307.952	0	0	9.02975	14.02	485.25	16.3377	41414.9
F1	10.4128	9.95271	2.55212	5.6002	10.0493	1991.37	50556.1	888.772	5827.42
F2	1306.49	1244.1	879.234	273.648	33.5012	36734.5	17445	172.183	3168.32
F3	7.09966	6.78594	2.03578	3.59655	0	1201.5	3301.28	422.635	1587.68
F4	1932.63	616.916	9.25374	41.7746	0	0	0	0	767.984
H	15.6056	15.6056	0	2.80902	42.1784	1576.21	2464.93	0	405.333
I	1279.8	1254.03	503.036	465.578	43.9577	17256	112477	5.7179	21852
J	283.483	282.241	53.2626	136.361	3.82349	16.8992	37.6448	340.13	1026.38
K	916.315	288.346	0	199.624	0	0	0	11647.8	0
L	560.63	29.2159	2.25417	7.27052	0.429694	3.48276	101	19247.9	728.523
Sweden	44170.4	25560.2	5265.42	6836.31	26632.3	133685	435248	54534.6	153686
2010	44170.4	25560.2	5265.42	6836.31	26632.3	133685	435248	54534.6	153686
A	2545.56	1940.84	193.26	366.895	6788.38	15686.9	7860.51	367.792	3915.7
B	9024.65	6612.7	202.586	343.114	18384.4	30404	28175.8	2687.06	20556.6
C	9655.58	9200.86	3482.42	3685.57	968.182	5388.65	121524	183.375	13070.9
D	397.776	163.636	73.6364	37.7622	239.382	336.804	60.247	6.58713	5341.88
E	291.517	207.6	0	0	5.28198	8.23856	250.777	17.946	61843.6
F1	48.8342	48.8342	14.6503	25.8821	41.2899	7712.82	114113	2934.36	17757.7
F2	1376.01	1376.01	934.772	330.927	39.2969	52219	14809.1	207.28	2466.12
F3	0	0	0	0	0	43.9361	88.7261	13.7929	75.5279
F4	13957.9	2791.57	32.257	202.009	0	0	0	0	1270.34
H	27.3412	27.3412	0	4.92142	93.5319	948.796	1440.21	0	156.014
I	1591.02	1507.96	172.775	985.833	60.8459	20755.8	146104	9.15911	15975
J	877.286	865.327	157.977	429.31	11.2553	176.622	713.667	1233.36	1000.83
K	2244.93	580.437	0	401.841	0	0	0	22514.8	0
L	2132.05	237.054	1.0884	22.2452	0.459475	3.72414	108	24359.1	10255.3

## Sheet: Table S5, Nomenclatures
Our Nordic inventory uses SNAP nomenclature for the sectors, and CAMS-REGv4.2 uses GNFR. Below is a comparison table of the two.
SNAP		TNO GNFR
01	Combustion in the production and transformation of energy	A & B
02	Non-industrial combustion plants	C
03	Industrial combustion plants	B
04	Industrial processes without combustion	B
05	Extraction and distribution of fossil fuels and geothermal energy	D
06	Use of solvents and other products	E
07	Road Transport	F
08	Other mobile sources and machinery	I & G & H
09	Waste treatment and disposal	J
010	Agriculture	K & L
TNO GNFR
A	A_PublicPower
B	B_Industry
C	C_OtherStationaryComb
D	D_Fugitives
E	E_Solvents
F	F_RoadTransport
G	G_Shipping
H	H_Aviation
I	I_OffRoad
J	J_Waste
K	K_AgriLivestock
L	L_AgriOther
TNO GNFR
F1	F_RoadTransport_exhaust_gasoline
F2	F_RoadTransport_exhaust_diesel
F3	F_RoadTransport_exhaust_LPG_gas
F4	F_RoadTransport_non-exhaust
